# Supplementary material for: Integrated analysis of transcriptomics and metabolomics and high-throughput amplicon sequencing reveals the synergistic effects of secondary metabolites and rhizosphere microbiota on root rot resistance in Psammosilene tunicoides
Source: Front Microbiol. 2025 Apr 14;16:1554406. doi: 10.3389/fmicb.2025.1554406 (PMC12034638; doi:10.3389/fmicb.2025.1554406)
Supplement: Supplementary file 5 [file Table_5.xlsx]

## Sheet: Sheet1
Index	Q1 (Da)	Q3 (Da)	Molecular weight (Da)	Formula	Ionization model	Compounds	物质	Class I	物质一级分类	Class II	物质二级分类	CAS	Level	WI1	WI2	WI3	CD3	CD4	CD5	CH3	CH4	CH5	QC01	QC02	QC03	cpd_ID	kegg_map
Zaxn005783	315.2	315.2	316.24	C21H32O2	[M-H]-	Methyl neoabietate	新枞酸甲酯	Terpenoids	萜类	Ditepenoids	二萜	3310-97-2	2	136020	54912.9	390380	397745	105314	34093.2	44304.1	158368	320865	246910	249088	247801	-	-
pmn001738	403.12	223.06	404.132	C17H24O11	[M-H]-	Oleoside 11-methyl ester	木樨榄苷-11-甲酯	Terpenoids	萜类	Monoterpenoids	倍萜	60539-23-3	3	210200	515.775	7370.58	2376.58	42920.7	29413.1	3462.08	34542.6	1330.91	25728.8	25782.6	25978.4	-	-
Lmqn008975	433.23	152.99	434.243	C21H39O7P	[M-H]-	PA(18:2/0:0)	磷脂酸(18:2/0:0)	Lipids	脂质	Glycerol ester	甘油酯	-	3	1.09207e+06	465526	748570	2.72402e+06	2.84575e+06	3.11664e+06	1.50989e+06	1.18348e+06	1.67829e+06	2.26095e+06	2.26229e+06	2.23551e+06	-	-
MWSslk208	301.22	301.22	302.225	C20H30O2	[M-H]-	Kaurenoic Acid	贝壳杉烯酸	Terpenoids	萜类	Ditepenoids	二萜	6730-83-2	1	3.81733e+07	7.56102e+06	1.21888e+08	1.17807e+08	3.32139e+07	2.77202e+06	3.55501e+06	5.6122e+07	1.22341e+08	1.00275e+08	9.90262e+07	9.91296e+07	C11874	ko00904,ko01100,ko01110
Zbdn001947	301.09	123.01	302.1	C13H18O8	[M-H]-	Isotachioside*	异它乔糖苷*	Phenolic acids	酚酸类	Phenolic acids	酚酸类	31427-08-4	1	986204	982587	514971	197865	393065	191054	157121	103293	161530	715620	720372	710090	-	-
pmc0066	333.06	137.05	332.052	C10H13N4O7P	[M+H]+	2'-Deoxyinosine-5'-monophosphate	2'-脱氧肌苷-5'-单磷酸	Nucleotides and derivatives	核苷酸及其衍生物	Nucleotides and derivatives	核苷酸及其衍生物	3393-18-8	3	1.43065e+07	1.106e+07	8.08401e+06	1.1075e+07	1.31012e+07	1.07316e+07	565849	5.9193e+06	6.65938e+06	3.01711e+06	2.9657e+06	2.98379e+06	C06196	ko00230,ko01232
pme1194	228.1	112.05	227.091	C9H13N3O4	[M+H]+	2'-Deoxycytidine	2'-脱氧胞苷	Nucleotides and derivatives	核苷酸及其衍生物	Nucleotides and derivatives	核苷酸及其衍生物	951-77-9	3	687701	293593	668847	368728	166610	134364	99727.7	159777	68520.4	192474	191668	195069	C00881	ko00240,ko01100,ko01232,ko02010
pmp001270	494.32	184.07	493.317	C24H48NO7P	[M+H]+	LysoPC 16:1*	溶血磷脂酰胆碱 16:1*	Lipids	脂质	LPC	溶血磷脂酰胆碱	76790-27-7	1	588935	174828	204643	627710	1.22773e+06	682475	1.21442e+06	688357	703365	336997	330705	332405	-	-
Zmdn002353	451.13	289.07	452.132	C21H24O11	[M-H]-	Epicatechin-6-C-β-D-glucopyranoside	表儿茶素-6-C-β-D-葡萄糖苷	Flavonoids	黄酮	Flavanols	黄烷醇类	-	1	2.49734e+06	2.39846e+06	139319	211059	1.0351e+06	176637	35410.4	26422.6	6314.05	373643	377862	381196	-	-
pmp001264	274.27	256.27	273.267	C16H35NO2	[M+H]+	Hexadecylsphingosine	十六烷基鞘胺醇	Lipids	脂质	Sphingolipids	鞘脂	-	1	7.65566e+06	1.16837e+07	9.49599e+06	7.71601e+06	7.55497e+06	6.36525e+06	6.85043e+06	7.71139e+06	6.20391e+06	1.08846e+07	1.09657e+07	1.07495e+07	-	-
pmb0197	298.11	166.07	297.107	C11H15N5O5	[M+H]+	N7-Methylguanosine	N7-甲基鸟苷	Nucleotides and derivatives	核苷酸及其衍生物	Nucleotides and derivatives	核苷酸及其衍生物	20244-86-4	3	89218	52049.7	67791.6	64642.7	38207.2	26908.4	18436.8	28191.1	25785.5	65584.4	66447.2	66928.9	C20674	-
Zmhn000892	301.09	139.05	302.1	C13H18O8	[M-H]-	4-O-Glucosyl-3,4-dihydroxybenzyl alcohol	4-O-葡萄糖基-3,4-二羟基苄醇	Phenolic acids	酚酸类	Phenolic acids	酚酸类	-	3	543138	632021	213193	52814.2	158671	62288.7	28382.7	21464	23926.9	205107	202415	207484	-	-
mws4170	179.06	59.01	180.063	C6H12O6	[M-H]-	D-Glucose	D-葡萄糖	Others	其它类	Saccharides	糖类	50-99-7	3	1.28138e+06	1.77884e+06	1.29114e+06	1.0187e+06	1.00444e+06	770876	458079	876832	668717	1.29721e+06	1.28848e+06	1.31996e+06	C00031	ko00010,ko00030,ko00052,ko00500,ko00520,ko00524,ko00901,ko01100,ko01110,ko02010
MWSmce682	149.05	59.01	150.053	C5H10O5	[M-H]-	DL-Xylose	DL-木糖	Others	其它类	Saccharides	糖类	25990-60-7	3	49309.8	68967.1	79827.1	72106.9	69917.6	42150	46320.6	90216.2	46664.4	37496.3	37735.8	36772.4	-	-
MWSmce035	485.34	405.32	486.334	C30H46O5	[M-H]-	3,16-Dihydroxy-23-oxoolean-12-en-28-oic acid (Quillaic acid)	3,16-二羟基-23-氧代齐墩果-12-烯-28-酸 (皂皮酸)	Terpenoids	萜类	Triterpene	三萜	631-01-6	1	3.42965e+06	3.89019e+06	2.78553e+06	8.70354e+06	3.03342e+06	1.57257e+06	1.22544e+06	915328	746706	3.49495e+06	3.39927e+06	3.44135e+06	C08972	-
Lmbn007891	313.24	183.14	314.246	C18H34O4	[M-H]-	Hydroxy ricinoleic acid	羟基蓖麻油酸	Lipids	脂质	Free fatty acids	游离脂肪酸	-	1	9696.13	25973.1	14697.1	34490.6	19236.2	28738.8	11405	19615.9	21075.3	23239.9	22640.9	22717.3	-	-
mws5035	279.17	120.08	278.163	C15H22N2O3	[M+H]+	L-Leucyl-L-phenylalanine	L-亮氨酰-L-苯丙氨酸	Amino acids and derivatives	氨基酸及其衍生物	Amino acids and derivatives	氨基酸及其衍生物	56217-82-4	2	408861	268118	229261	453993	177266	166646	149153	237907	240962	521608	533192	519073	-	-
pmb0374	136.06	119.04	135.054	C5H5N5	[M+H]+	2-Aminopurine	2-氨基嘌呤	Nucleotides and derivatives	核苷酸及其衍生物	Nucleotides and derivatives	核苷酸及其衍生物	452-06-2	1	139273	60726.6	63478	85045.6	123257	122373	60909.7	75171.5	79441.6	97101.7	96230.9	98995.6	-	-
pme1383	170.08	134.06	169.074	C8H11NO3	[M+H]+	Pyridoxine	吡哆醇	Others	其它类	Vitamin	维生素	65-23-6	1	433131	2.40458e+06	416835	377612	315498	375764	461540	502474	433598	771453	794349	779690	C00314	ko00750,ko01100,ko01240
Cmmn013275	301.22	301.22	302.225	C20H30O2	[M-H]-	Isopimaric acid	异海松酸	Terpenoids	萜类	Ditepenoids	二萜	5835-26-7	1	4.20897e+07	8.27998e+06	1.3696e+08	134590107	3.79563e+07	2.87299e+06	3.9431e+06	5.67639e+07	1.37811e+08	1.1151e+08	1.13241e+08	1.15e+08	-	-
Lmyn011818	467.32	467.32	468.324	C30H44O4	[M-H]-	3,19-Epoxy-3,22-dihydroxydammara-20,24-dien-26-oic acid δ-lactone (Semialactone)	3,19-环氧-3,22-二羟基达玛烷-20,24-二烯-26-酸 δ-内酯 (半翅盐肤木内酯)	Terpenoids	萜类	Triterpene	三萜	366450-46-6	2	5.3314e+06	1.88887e+06	2.15686e+06	4.63238e+06	2.65882e+06	1.2073e+06	1.11732e+06	246230	214637	2.31122e+06	2.31111e+06	2.37396e+06	-	-
pme1178	284.1	152.06	283.092	C10H13N5O5	[M+H]+	Guanosine	鸟苷	Nucleotides and derivatives	核苷酸及其衍生物	Nucleotides and derivatives	核苷酸及其衍生物	118-00-3	1	6.7624e+06	4.32133e+06	4.94555e+06	7.83113e+06	1.0176e+07	1.08868e+07	5.94725e+06	7.0209e+06	7.8456e+06	8.97209e+06	9.12958e+06	8.83598e+06	C00387	ko00230,ko01100,ko01232,ko02010
Zmyn004449	309.21	171.1	310.214	C18H30O4	[M-H]-	9-Hydroxy-12-oxo-10(E),15(Z)-octadecadienoic acid	9-羟基-12-氧代-10(E),15(Z)-十八碳二烯酸	Lipids	脂质	Free fatty acids	游离脂肪酸	-	1	18236.8	16928.9	25135.4	36569.3	18447.3	17222.6	9645.63	13644.3	13181.7	20950.5	20570.2	20253.9	C21923	ko00592,ko01110
mws0988	315.05	165.04	316.058	C16H12O7	[M-H]-	Rhamnetin; 3,5,3',4'-Tetrahydroxy-7-Methoxyflavone	鼠李素	Flavonoids	黄酮	Flavonols	黄酮醇	90-19-7	3	16143.5	1151.48	7400.56	6661.38	3660.01	2483.52	9	9	9	7858.1	8145.5	8039.64	C10176	-
Zmjp000624	168.06	150.05	167.058	C8H9NO3	[M+H]+	Pyridoxal	吡哆醛	Others	其它类	Vitamin	维生素	66-72-8	2	272513	245377	205016	259908	207429	231423	175922	207703	313832	204200	211812	208843	C00250	ko00750,ko01100,ko01240
Lmyn012331	281.25	281.25	282.256	C18H34O2	[M-H]-	Petroselinic acid*	岩芹酸*	Lipids	脂质	Free fatty acids	游离脂肪酸	593-39-5	1	1.47082e+07	1.61389e+07	2.20016e+07	2.88629e+07	2.62357e+07	1.39028e+07	2.07124e+07	1.03623e+07	1.65771e+07	2.17631e+07	2.10123e+07	2.16333e+07	C08363	-
mws0396	281.25	281.25	282.256	C18H34O2	[M-H]-	Elaidic Acid*	反油酸*	Lipids	脂质	Free fatty acids	游离脂肪酸	112-79-8	1	1.47082e+07	1.61389e+07	2.20016e+07	2.88629e+07	2.62357e+07	1.39028e+07	2.07124e+07	1.03623e+07	1.65771e+07	2.17631e+07	2.10123e+07	2.16333e+07	C01712	-
Cmmp006152	471.31	471.31	472.319	C29H44O5	[M-H]-	Norarjunolic acid	去甲阿江榄仁酸	Terpenoids	萜类	Triterpene	三萜	60393-90-0	2	619996	233513	621873	6.53283e+06	217879	191736	25272.8	38032.6	23768	658954	637968	637135	-	-
MWSmce539	315.25	185.12	314.246	C18H34O4	[M+H]+	Dibutyl sebacate	癸二酸二丁酯	Lipids	脂质	Free fatty acids	游离脂肪酸	109-43-3	3	31242.4	25655.7	107118	149648	29107.6	12745.3	9097.39	32012.3	37033.3	52611.7	54698.5	53214.4	-	-
MWS5164	203.15	70.07	202.143	C8H18N4O2	[M+H]+	N,N'-Dimethylarginine;SDMA*	N,N'-二甲基精氨酸*	Amino acids and derivatives	氨基酸及其衍生物	Amino acids and derivatives	氨基酸及其衍生物	30344-00-4	1	2.63824e+06	657248	426090	758823	1.66944e+06	1.17214e+06	1.57768e+06	390420	411111	2.9091e+06	2.81479e+06	2.80316e+06	-	-
Zmpn000199	209.03	85.03	210.038	C6H10O8	[M-H]-	D-Galactaric acid	D-半乳糖二酸	Others	其它类	Saccharides	糖类	526-99-8	3	126681	240176	437927	318858	290263	302045	100771	502381	145719	115198	119847	116376	C00879	ko00053,ko01100
mws0366	277.22	277.22	278.225	C18H30O2	[M-H]-	γ-Linolenic Acid*	γ-亚麻酸*	Lipids	脂质	Free fatty acids	游离脂肪酸	506-26-3	1	1.63096e+07	1.15034e+07	1.13119e+07	2.5899e+07	1.89948e+07	1.2447e+07	1.31366e+07	7.72019e+06	1.01417e+07	1.67476e+07	1.65612e+07	16078843	C06426	ko00591,ko01040,ko01100
Lmyn012274	469.33	469.33	470.34	C30H46O4	[M-H]-	3,25-Epoxy-3-hydroxyolean-18-en-28-oic acid (Semimoronic acid)	3,25-环氧-3-羟基齐墩果-18-烯-28-酸 (3,25-环氧模绕醇酸)	Terpenoids	萜类	Triterpene	三萜	102053-38-3	2	231888	155286	105654	97756.4	137625	31500.4	32047.9	34435.1	40604	130938	135492	136160	-	-
Zmhn001926	299.08	137.02	300.084	C13H16O8	[M-H]-	1-O-Salicyloyl-β-D-glucose	1-O-水杨酰-β-D-葡萄糖	Phenolic acids	酚酸类	Phenolic acids	酚酸类	60517-74-0	1	1.9611e+07	1.01758e+07	1.80925e+07	9.14967e+06	1.67091e+07	1.10355e+07	4.99731e+06	4.8039e+06	2.77404e+06	6.20773e+06	6.33819e+06	6.48104e+06	-	-
mws1346	162.08	98.06	161.069	C6H11NO4	[M+H]+	DL-2-Aminoadipic acid	DL-2-氨基己二酸	Alkaloids	生物碱	Alkaloids	生物碱	542-32-5	3	186126	177472	341545	201213	288196	178580	111544	369169	124795	215971	210157	219365	C00956	ko00300,ko00310,ko00311,ko01100,ko01110,ko01210,ko01230
Lmdn001560	345.12	165.06	346.126	C15H22O9	[M-H]-	6-DeoxyCatalpol	6-脱氧梓醇	Terpenoids	萜类	Monoterpenoids	倍萜	99499-99-7	1	223550	125173	108489	54391.9	105265	70678.8	67606.7	67274.4	79222.5	69323.5	72334.5	71406.6	-	-
pmb0865	518.32	184.07	517.317	C26H48NO7P	[M+H]+	LysoPC 18:3(2n isomer)*	溶血磷脂酰胆碱 18:3(2n异构)*	Lipids	脂质	LPC	溶血磷脂酰胆碱	-	1	4.76035e+06	1.42522e+06	1.85601e+06	4.50002e+06	5.72464e+06	3.7922e+06	6.6946e+06	3.89749e+06	4.0377e+06	6.63817e+06	6.91371e+06	6.68336e+06	-	-
Lmsn012480	483.31	421.31	484.319	C30H44O5	[M-H]-	2,19-Dihydroxy-3-oxoursa-1,12-dien-28-oic acid (Fupenzic acid)	2,19-二羟基-3-氧代熊果-1,12-二烯-28-酸 (覆盆子酸)	Terpenoids	萜类	Triterpene	三萜	119725-20-1	2	498567	208258	187960	451665	199677	112195	97108.6	23302.7	15680.7	167996	175330	174195	-	-
pmb0881	478.29	337.27	477.286	C23H44NO7P	[M+H]+	LysoPE 18:2*	溶血磷脂酰乙醇胺 18:2*	Lipids	脂质	LPE	溶血磷脂酰乙醇胺	-	2	3.83527e+07	1.51282e+07	1.55406e+07	2.08529e+07	2.98029e+07	2.14745e+07	2.39307e+07	2.48139e+07	2.57476e+07	3.85603e+07	3.91559e+07	3.74129e+07	-	-
pmb0883	482.32	341.31	481.317	C23H48NO7P	[M+H]+	LysoPE 18:0	溶血磷脂酰乙醇胺 18:0	Lipids	脂质	LPE	溶血磷脂酰乙醇胺	69747-55-3	3	31167.2	20559.5	25752.5	60455.6	65426.3	32988.8	73808.5	53742.5	117414	55220.6	56342.8	53787.3	-	-
Cmmn005231	391.14	59.01	392.147	C20H24O8	[M-H]-	Massoniresinol; Vladinol A	马尾松树脂醇	Lignans and Coumarins	木脂素和香豆素	Lignans	木脂素	96087-10-4	2	133877	26839.3	122650	18266.8	26276.3	25835.1	14748	37794.6	33055.9	37334.7	38959.8	38942.5	-	-
mws0058	299.06	284.03	300.063	C16H12O6	[M-H]-	Diosmetin (5,7,3'-Trihydroxy-4'-methoxyflavone)*	香叶木素*	Flavonoids	黄酮	Flavones	黄酮	520-34-3	3	7431.72	24739	6808.34	21637.1	15435.7	22459.3	7267.96	31887.9	8460.82	21555.2	21339.2	22346.4	C10038	-
NK10253223	168.06	94.06	167.058	C8H9NO3	[M+H]+	2-Amino-3-methoxybenzoic acid	2-氨基-3-甲氧基苯甲酸	Phenolic acids	酚酸类	Phenolic acids	酚酸类	3177-80-8	3	264707	247124	198892	248135	199975	221310	154436	180192	288910	203017	200912	193675	C05831	ko00380
mws1024	147.05	129.03	148.052	C9H8O2	[M-H]-	p-Coumaraldehyde	对香豆醛	Phenolic acids	酚酸类	Phenolic acids	酚酸类	2538-87-6	3	11024.4	3539.84	14983.1	11520.8	10462.7	3809.45	2476.53	5778.44	3334.26	10614.7	10819.5	10298.7	C05608	ko00940,ko01100,ko01110
mws0062	287.06	241.05	286.048	C15H10O6	[M+H]+	Isoluteolin (Orobol)(5,7,3',4'-tetrahydroxyisoflavone)	异木犀草素(香豌豆苷元)	Flavonoids	黄酮	Isoflavones	异黄酮	480-23-9	3	630832	15550.1	133018	81702.4	87934.1	28765.8	13284.7	6956.54	10180.9	137877	144579	139536	C10510	-
mws2623	281.25	281.25	282.256	C18H34O2	[M-H]-	11-Octadecanoic acid(Vaccenic acid)*	11-十八碳烯酸*	Lipids	脂质	Free fatty acids	游离脂肪酸	506-17-2	1	1.33887e+07	1.60852e+07	2.12177e+07	2.78315e+07	2.49179e+07	1.43594e+07	1.97315e+07	9.92084e+06	1.50813e+07	2.08361e+07	2.10477e+07	2.18365e+07	C21944	-
Lhwp111001	647.38	439.32	646.372	C36H54O10	[M+H]+	Gypsogenin-3-β-D-glucecronoside	王不留行次皂苷	Terpenoids	萜类	Triterpene Saponin	三萜皂苷	-	3	354116	381684	338537	134588	171362	111447	97762.2	141054	125155	222308	216941	211369	-	-
pme1109	152.06	135.03	151.049	C5H5N5O	[M+H]+	Guanine	鸟嘌呤	Nucleotides and derivatives	核苷酸及其衍生物	Nucleotides and derivatives	核苷酸及其衍生物	73-40-5	2	510065	303157	442951	359756	398550	125534	120011	86937.3	57612.5	206893	216419	206800	C00242	ko00230,ko01100,ko01232
Zmyn004714	297.24	183.14	298.251	C18H34O3	[M-H]-	Ricinoleic acid	蓖麻油酸	Lipids	脂质	Free fatty acids	游离脂肪酸	141-22-0	3	21450.9	19194.5	41887.8	22276.1	22661.7	7748.68	12416.7	7495.44	9503.95	20772.3	20188.1	21279.2	C08365	-
mws0639	153.02	109.03	154.027	C7H6O4	[M-H]-	2,3-Dihydroxybenzoic Acid*	2,3-二羟基苯甲酸*	Phenolic acids	酚酸类	Phenolic acids	酚酸类	303-38-8	3	222242	262191	185956	375855	401849	255842	228862	243544	228214	221282	209945	217648	C00196	ko01110
Lmzn006169	471.35	471.35	472.355	C30H48O4	[M-H]-	3,19-Dihydroxyurs-12-en-28-oic acid (Pomolic acid)	3,19-二羟基熊果-12-烯-28-酸 (坡模酸)	Terpenoids	萜类	Triterpene	三萜	13849-91-7	1	5.9984e+06	3.2114e+06	2.01485e+06	1.91459e+07	3.57303e+06	1.28252e+06	826041	594122	822025	4.05594e+06	3.86798e+06	3.877e+06	-	-
Zbzn008048	293.18	221.15	294.183	C17H26O4	[M-H]-	Embelin	酸藤子酚	Quinones	醌类	Quinones	醌类	550-24-3	1	455753	468719	506311	475963	483867	476744	494912	581441	504531	440776	464097	446232	-	-
Lskp211413	463.31	185.11	462.298	C27H42O6	[M+H]+	2,3,20,22,25-Pentahydroxy-14-methyl-18-norcholesta-7,12-dien-6-one (Stachysterone A)	2,3,20,22,25-五羟基-14-甲基-18-去甲基胆甾烷-7,12-二烯-6-酮 (旌节花甾酮 A)	Steroids	甾体	Steroid	甾体	30655-78-8	3	7170.72	8561.59	8381.44	8266.36	7344.88	4898.1	5065.53	5392.18	5279.94	5327.77	5054.07	5135.47	-	-
Lcyp000112	370.14	209.07	369.132	C19H19N3O5	[M+H]+	Dichotomide XI	银柴胡氨XI	Amino acids and derivatives	氨基酸及其衍生物	Amino acids and derivatives	氨基酸及其衍生物	1258956-46-5	2	354963	3703.01	13888.4	236948	9068.05	17426	6089.97	725.343	5473.52	97131	96431.3	92303.9	-	-
Zahp012577	280.26	81.07	279.256	C18H33NO	[M+H]+	octadecadienoic acid amide	十八碳二烯酸酰胺	Alkaloids	生物碱	Alkaloids	生物碱	-	1	290560	398809	548913	257850	393011	345361	289926	334535	304942	524631	551633	527899	-	-
zjgp122317	515.15	177.05	514.148	C26H26O11	[M+H]+	4-O-(2''-O-acetyl-6''-P-coumaroyl-β-D-glucopyranosyl)-P-coumaric acid	4-O-(2''-O-乙酰基-6''-P-香豆酰-β-D-吡喃葡萄糖基)-P-香豆酸	Others	其它类	Others	其它	-	1	4.6848e+06	2.79504e+06	267997	375167	133638	95743	605136	259746	454408	8.17551e+06	8.33276e+06	7.88919e+06	-	-
pma1303	492.31	184.07	491.301	C24H46NO7P	[M+H]+	LysoPC 16:2*	溶血磷脂酰胆碱 16:2*	Lipids	脂质	LPC	溶血磷脂酰胆碱	-	2	52791.8	26805.3	35416.1	70623.5	223513	125623	128919	93508.1	113990	57179.9	58699.1	60472.2	-	-
mws0242	173.08	111.08	174.089	C8H14O4	[M-H]-	Suberic Acid	辛二酸	Organic acids	有机酸	Organic acids	有机酸	505-48-6	3	151294	59300.4	445122	287887	293084	160236	40279.7	56851.3	51702.5	178431	168732	175472	C08278	-
Lmwp003442	449.11	287.06	448.101	C21H20O11	[M+H]+	Amoenin	山野豌豆苷(山柰酚-3-O-甘露糖苷)	Flavonoids	黄酮	Flavonols	黄酮醇	-	2	9.23533e+06	981692	2.64049e+06	2.01944e+06	2.38788e+06	1.03034e+06	756771	440528	458922	5.295e+06	5.14704e+06	4.99968e+06	-	-
MWS2430	241.22	241.21	242.225	C15H30O2	[M-H]-	13-methylmyristic acid	13-甲基十四烷酸	Lipids	脂质	Free fatty acids	游离脂肪酸	2485-71-4	3	506053	444486	642105	584812	540663	453009	249252	370717	308413	702497	741492	736160	-	-
mws0005	161.11	144.08	160.1	C10H12N2	[M+H]+	Tryptamine	色胺	Alkaloids	生物碱	Plumerane	吲哚类生物碱	61-54-1	3	395809	526949	454483	759273	1.7746e+06	364583	336908	265692	191676	225025	237706	227534	C00398	ko00380,ko00901,ko01100,ko01110
mws0193	190.12	84.08	189.111	C7H15N3O3	[M+H]+	L-Homocitrulline	L-高瓜氨酸	Amino acids and derivatives	氨基酸及其衍生物	Amino acids and derivatives	氨基酸及其衍生物	1190-49-4	3	161709	913842	135507	418607	240031	137670	355338	609314	611755	416180	398142	421200	C02427	-
MWS0205	157.04	97	158.044	C4H6N4O3	[M-H]-	Allantoin	尿囊素	Organic acids	有机酸	Organic acids	有机酸	97-59-6	3	380049	18582.8	37063.6	39263.5	60429.5	56104.4	69334.7	28955.4	11033	165874	158481	167636	C01551	-
pmp001251	520.34	184.07	519.332	C26H50NO7P	[M+H]+	LysoPC 18:2(2n isomer)	溶血磷脂酰胆碱 18:2(2n异构)	Lipids	脂质	LPC	溶血磷脂酰胆碱	-	1	6.58608e+07	2.20826e+07	2.79148e+07	4.55266e+07	4.78185e+07	3.15329e+07	3.10859e+07	3.0376e+07	2.65761e+07	5.60687e+07	5.69988e+07	5.37778e+07	-	-
Lmmp000897	611.14	287.05	610.132	C30H26O14	[M+H]+	Gallocatechin-(4α→8)-gallocatechin	没食子儿茶素-(4α→8)-没食子儿茶素	Flavonoids	黄酮	Flavanols	黄烷醇类	-	3	4.30641e+06	769609	5.43436e+06	1.74186e+06	2.55359e+06	1.37627e+06	1.74147e+06	1.02968e+06	1.16437e+06	1.59245e+06	1.65875e+06	1.56561e+06	-	-
pme3017	104.07	58.07	103.063	C4H9NO2	[M+H]+	2-Aminoisobutyric acid	2-氨基异丁酸	Organic acids	有机酸	Organic acids	有机酸	62-57-7	2	3.40626e+06	2.82757e+06	3.53685e+06	2.79268e+06	3.76883e+06	2.7803e+06	3.53643e+06	2.81714e+06	3.54669e+06	3.28332e+06	3.40057e+06	3.48493e+06	C03665	-
HX1349	133.05	69.04	132.042	C5H8O4	[M+H]+	dihydro-4-hydroxy-5-hydroxymethyl-2(3H)-furanone	二氢-4-羟基-5-羟甲基-2(3H)-呋喃酮	Others	其它类	Others	其它	-	2	56331.9	51465.1	56419.8	52600.9	116055	48722.9	228777	49117.9	52786.4	78191.6	80551.5	83037.5	-	-
pmn001705	471.35	471.35	472.355	C30H48O4	[M-H]-	3,24-Dihydroxy-17,21-semiacetal-12(13)oleanolic fruit	3,24-二羟基-17,21-半缩醛基-12(13)齐墩果	Terpenoids	萜类	Triterpene	三萜	-	3	5.07629e+06	3.64349e+06	1.69686e+06	1.64766e+07	3.6269e+06	1.29567e+06	727893	629367	925392	3.8913e+06	3.77612e+06	4.0131e+06	-	-
Cmmn013378	301.22	301.22	302.225	C20H30O2	[M-H]-	Levopimaric acid	左旋海松酸	Terpenoids	萜类	Ditepenoids	二萜	79-54-9	1	6.56353e+06	1.64089e+06	1.96989e+07	4.17938e+07	6.34794e+06	701569	867815	9.15706e+06	30855643	2.05017e+07	2.17243e+07	2.0786e+07	-	-
pmf0297	297.32	183.21	298.324	C20H42O	[M-H]-	1-Eicosanol	正二十醇	Lipids	脂质	Free fatty acids	游离脂肪酸	629-96-9	3	21131.9	16613	38029.3	20712.4	20995	6411.16	14831.2	7091.33	9206.92	17782.5	17276.4	18363	-	-
Lmbn005287	311.22	249.22	312.23	C18H32O4	[M-H]-	7S,8S-DiHODE; (9Z,12Z)-(7S,8S)-Dihydroxyoctadeca-9,12-dienoic acid	7,8-二羟基-9,12-十八碳二烯酸	Lipids	脂质	Free fatty acids	游离脂肪酸	143288-65-7	2	171292	561905	279637	529284	707714	504468	134683	248013	141514	271686	268613	284458	C07354	ko00591
MWS80007	311.22	249.22	312.23	C18H32O4	[M-H]-	13-Hydroperoxy-9Z,11E-octadecadienoic acid	13-过氧化羟基-9Z,11E-十八碳二烯酸	Lipids	脂质	Free fatty acids	游离脂肪酸	23017-93-8	2	171292	561905	279637	529284	707714	504468	134683	248013	141514	271686	268613	284458	-	-
MWS201465	295.13	120.08	294.122	C14H18N2O5	[M+H]+	Glu-Phe	L-谷氨酸-L-苯丙氨酸	Amino acids and derivatives	氨基酸及其衍生物	Amino acids and derivatives	氨基酸及其衍生物	20556-22-3	1	149577	107321	141871	239379	171133	110166	139968	130373	134191	270634	285506	270970	-	-
pmb0854	518.32	184.07	517.317	C26H48NO7P	[M+H]+	LysoPC 18:3*	溶血磷脂酰胆碱 18:3*	Lipids	脂质	LPC	溶血磷脂酰胆碱	-	1	4.90319e+06	1.59751e+06	1.71746e+06	4.69529e+06	6.43141e+06	3.9472e+06	8.75685e+06	4.41401e+06	4.5237e+06	7.27815e+06	7.40218e+06	6.9684e+06	-	-
Hmjn008136	469.33	469.33	470.34	C30H46O4	[M-H]-	2,3-Dihydroxyoleana-11,13(18)-dien-28-oic acid (Camaldulenic acid)	2,3-二羟基齐墩果-11,13(18)-二烯-28-酸 (脱氢山楂酸)	Terpenoids	萜类	Triterpene	三萜	71850-15-2	1	1.91688e+07	1.51107e+07	1.12685e+07	4.26845e+07	2.04294e+07	8.73519e+06	6.18014e+06	3.23315e+06	4.49654e+06	1.47637e+07	1.42302e+07	1.51425e+07	-	-
Zmjn004133	311.22	293.21	312.23	C18H32O4	[M-H]-	9S-Hydroperoxy-10E,12Z-octadecadienoic acid	9S-氢过氧-10E,12Z-十八碳二烯酸	Lipids	脂质	Free fatty acids	游离脂肪酸	5502-91-0	3	12154.9	23631.7	25907.5	209946	68935.5	14036.6	18748.8	15170.3	9348.36	16638.3	17251.1	17714.4	C14827	ko00591,ko01100
Hmhp001812	282.12	136.06	281.112	C11H15N5O4	[M+H]+	2'-O-Methyladenosine	2-甲氧基腺苷	Nucleotides and derivatives	核苷酸及其衍生物	Nucleotides and derivatives	核苷酸及其衍生物	2140-79-6	1	178044	129352	192927	243592	248017	250106	302812	147473	332903	332044	345773	324885	-	-
mws0178	353.09	191.06	354.095	C16H18O9	[M-H]-	Chlorogenic acid (3-O-Caffeoylquinic acid)*	绿原酸 (3-O-咖啡酰奎宁酸)*	Phenolic acids	酚酸类	Phenolic acids	酚酸类	327-97-9	3	536592	297635	111958	121857	154841	139108	66785.2	161670	142312	127050	128388	134802	C00852	ko00940,ko00941,ko00945,ko01110
mws0001	133.06	74.02	132.054	C4H8N2O3	[M+H]+	L-Asparagine	L-天冬酰胺	Amino acids and derivatives	氨基酸及其衍生物	Amino acids and derivatives	氨基酸及其衍生物	70-47-3	3	250035	176064	201549	273058	479921	220952	888226	286907	287589	379910	394452	404866	C00152	ko00250,ko00460,ko00970,ko01100,ko01110,ko01230
HJN041	451.12	289.07	452.132	C21H24O11	[M-H]-	Epicatechin glucoside*	表儿茶素苷*	Flavonoids	黄酮	Flavanols	黄烷醇类	-	2	4.14385e+06	8.40339e+06	428277	4.685e+06	8.82459e+06	2.48318e+06	666946	470471	153171	2.45074e+06	2.39099e+06	2.29812e+06	-	-
Zmyn004732	293.21	185.12	294.219	C18H30O3	[M-H]-	2R-hydroxy-9Z,12Z,15Z-octadecatrienoic acid	2R-羟基-9Z,12Z,15Z-十八碳三烯酸	Lipids	脂质	Free fatty acids	游离脂肪酸	-	3	25737.8	51008.7	59748	112802	38437	37869.8	18620.8	50058.2	40454.7	56129.8	59859.5	57687	C16342	ko00592
Zmyn000108	209.03	85.03	210.038	C6H10O8	[M-H]-	D-Saccharic acid	D-蔗糖酸	Others	其它类	Saccharides	糖类	87-73-0	3	157841	254946	438548	327253	320296	292351	80272.4	528346	100323	113456	106679	108234	C00818	ko00053,ko01100
pmn001706	471.35	471.35	472.355	C30H48O4	[M-H]-	2,3-Dihydroxyolean-12-en-28-oic acid (2-Hydroxyoleanolic acid)*	2,3-二羟基齐墩果-12-烯-28-酸 (2-羟基齐墩果酸)*	Terpenoids	萜类	Triterpene	三萜	26707-60-8	2	4.96139e+06	3.47933e+06	1.72959e+06	1.66452e+07	3.44802e+06	1.25102e+06	759295	688046	828981	3.62555e+06	3.52503e+06	3.76066e+06	-	-
pmp000344	271.06	243.06	270.053	C15H10O5	[M+H]+	3',4',7-Trihydroxyflavone	3',4',7-三羟基黄酮	Flavonoids	黄酮	Flavones	黄酮	2150-11-0	3	92274.3	11679.5	37188.9	232213	7368.17	8001.47	7571.31	4866.76	8547.12	135148	127837	127705	-	-
mws0866	259.02	96.97	260.03	C6H13O9P	[M-H]-	D-Glucose 6-phosphate*	D-葡萄糖-6-磷酸*	Others	其它类	Saccharides	糖类	56-73-5	2	844594	941164	533416	475595	548293	502584	345593	237783	406523	800731	854084	819202	C00092	ko00500,ko00524,ko00562,ko01100,ko01110
Zajn002491	451.12	289.07	452.132	C21H24O11	[M-H]-	catechin-4-β-D-galactopyranoside*	儿茶素-4-β-D-吡喃半乳糖苷*	Flavonoids	黄酮	Flavanols	黄烷醇类	-	2	4.13378e+06	8.60883e+06	420542	4.58727e+06	8.51331e+06	2.45966e+06	722784	503229	166038	2.27372e+06	2.42903e+06	2.35778e+06	-	-
Zaxn005611	315.2	315.2	316.24	C21H32O2	[M-H]-	Methyl abieta	松香酸甲酯	Terpenoids	萜类	Ditepenoids	二萜	-	2	87480.9	57730.8	165993	200489	75939.2	63912.4	23878.5	105631	138449	116645	124651	120984	-	-
pme3961	252.11	136.06	251.102	C10H13N5O3	[M+H]+	2'-Deoxyadenosine*	2'-脱氧腺苷*	Nucleotides and derivatives	核苷酸及其衍生物	Nucleotides and derivatives	核苷酸及其衍生物	958-09-8	3	3.24447e+06	1.04665e+06	1.58184e+06	1.76785e+06	877315	572722	543478	708181	306418	1.25169e+06	1.18404e+06	1.25767e+06	C00559	ko00230,ko01100,ko01232,ko02010
MWSHY0040	433.11	271.06	432.106	C21H20O10	[M+H]+	Oroxin A	木蝴蝶苷 A	Flavonoids	黄酮	Flavones	黄酮	57396-78-8	2	2.79082e+06	1.4236e+06	7.75872e+06	1.10857e+06	2.19673e+06	910379	145581	286946	150082	1.27194e+06	1.35452e+06	1.28968e+06	-	-
pme0430	575.12	285.04	576.127	C30H24O12	[M-H]-	Procyanidin A1	原花青素 A1	Tannins	鞣质	Proanthocyanidins	原花青素	103883-03-0	3	8097.73	37348.8	1197.06	34817.7	27766.8	39879.3	17675.2	25396.1	21615.2	17368.1	17445	18431.2	-	-
Zjbn102543	475.18	179.07	476.183	C28H28O7	[M-H]-	Bletilols B	Bletilols B	Others	其它类	Others	其它	-	3	6.44503e+06	20875.2	4.16956e+06	798528	2.53201e+06	942430	507229	348306	399557	2.85054e+06	2.93086e+06	3.04749e+06	-	-
Hmjn003948	487.35	487.35	488.35	C30H48O5	[M-H]-	2,3,6-Trihydroxyurs-12-en-28-oic acid (Madasiatic acid)	2,3,6-三羟基熊果-12-烯-28-酸 (马达积雪草酸)	Terpenoids	萜类	Triterpene	三萜	26532-66-1	2	652559	258653	596160	1.19952e+06	1.4714e+06	280229	131837	72698.8	45609.3	528877	501949	534968	-	-
mws1329	463.09	301.04	464.096	C21H20O12	[M-H]-	Quercetin-7-O-glucoside	槲皮素-7-O-葡萄糖苷	Flavonoids	黄酮	Flavonols	黄酮醇	491-50-9	3	112089	172899	62249.1	1.21196e+06	1.45496e+06	1.82719e+06	170652	276734	254489	230646	246739	238663	C12639	-
HX1348	133.05	69.03	132.042	C5H8O4	[M+H]+	2-hydroxymethyl-D-ribono-γ-lactone	2-羟甲基-D-核糖基-γ-内酯	Others	其它类	Others	其它	-	2	114093	127011	80607.9	51733.5	96118.9	62009.1	141671	72545.4	67399.3	76793.2	81415.6	76858.4	-	-
mws1434	431.1	311.05	432.106	C21H20O10	[M-H]-	Apigenin-6-C-glucoside (Isovitexin)*	芹菜素-6-C-葡萄糖苷 (异牡荆素)*	Flavonoids	黄酮	Flavones	黄酮	38953-85-4	3	57186.2	117746	47581.2	783533	346402	114100	42188.6	67545.7	38619.4	178687	170343	167455	C01714	ko00944
pme2735	399.14	250.09	398.137	C15H22N6O5S	[M+H]+	S-(5'-Adenosyl)-L-methionine	S-(5'-腺苷基)-L-蛋氨酸	Amino acids and derivatives	氨基酸及其衍生物	Amino acids and derivatives	氨基酸及其衍生物	29908-03-0	3	120403	66432.6	70571.8	58699	50108.3	49885.4	81151.5	13516.4	136083	96178.8	91369.1	90204.3	C00019	ko00261,ko00270,ko00330,ko00908,ko00999,ko01100,ko01110,ko01230,ko01240,ko04122
mws1051	399.14	250.09	399.144	C15H23N6O5S+	[M]+	S-Adenosylmethionine	S-腺苷蛋氨酸	Amino acids and derivatives	氨基酸及其衍生物	Amino acids and derivatives	氨基酸及其衍生物	485-80-3	3	120403	66432.6	70571.8	58699	50108.3	49885.4	81151.5	13516.4	136083	96178.8	91369.1	90204.3	-	-
pmb0889	279.23	95.09	278.225	C18H30O2	[M+H]+	Punicic acid (9Z,11E,13Z-octadecatrienoic acid)	石榴酸 (9Z,11E,13Z-十八碳三烯酸)	Lipids	脂质	Free fatty acids	游离脂肪酸	544-72-9	3	228148	431441	363576	1.1853e+06	1.42102e+06	1.35772e+06	347161	453815	333828	707255	730841	682228	C08364	-
pmb1650	279.23	149.13	278.225	C18H30O2	[M+H]+	Octadeca-11E,13E,15Z-trienoic acid	十八碳-9E,13E,15Z-三烯酸	Lipids	脂质	Free fatty acids	游离脂肪酸	25575-00-2	3	4.30963e+07	4.53736e+07	5.14791e+07	3.10903e+07	3.62617e+07	2.40232e+07	2.16534e+07	2.29954e+07	2.19209e+07	3.21343e+07	3.37211e+07	3.15543e+07	-	-
Hahn002315	579.21	417.16	580.216	C28H36O13	[M-H]-	syringaresinol-4-O-β-D-glucopyranoside*	丁香树脂酚-4-O-葡萄糖苷*	Others	其它类	Others	其它	-	1	374490	339872	782705	256149	1.15601e+06	388444	117216	150762	227531	308570	330324	315918	-	-
Wmhp000055	169.05	65.04	168.042	C8H8O4	[M+H]+	2,5-Dimethoxybenzoquinone*	2,5-二甲氧基苯醌*	Quinones	醌类	Quinones	醌类	3117-03-1	1	2.74229e+06	2.08674e+06	7.02713e+06	680524	1.52449e+06	666911	258232	515706	501730	1.69574e+06	1.7094e+06	1.80733e+06	-	-
Rfmb087	311.22	293.21	312.23	C18H32O4	[M-H]-	9-Hydroxy-13-oxo-10-octadecenoic Acid	9-羟基-13-氧代-10-十八碳烯酸	Lipids	脂质	Free fatty acids	游离脂肪酸	-	3	20622.5	22486.4	41138.6	66862.1	52370.1	63317.1	15686.9	18986.8	15442.8	39757.9	42215.1	42343.5	-	-
Lmzn006284	471.35	471.35	472.355	C30H48O4	[M-H]-	2-Hydroxyursolic acid*	2-羟基熊果酸*	Terpenoids	萜类	Triterpene	三萜	-	2	1.25444e+06	1.17652e+06	1.0112e+06	3.55991e+06	1.46848e+06	576583	399181	261738	417577	1.19682e+06	1.19914e+06	1.12615e+06	-	-
Lcyn000106	551.18	193.05	552.184	C26H32O13	[M-H]-	Dichotomoside A	银柴胡新木质素-β-D-葡萄糖苷A	Lignans and Coumarins	木脂素和香豆素	Lignans	木脂素	-	2	443910	333683	293597	183785	322653	200466	64811.1	124571	205806	225873	235467	242461	-	-
Zmln000899	343.11	181.05	344.111	C15H20O9	[M-H]-	Syringaldehyde-4-O-glucoside	丁香醛-4-O-葡萄糖苷	Phenolic acids	酚酸类	Phenolic acids	酚酸类	-	2	196655	33921.1	198759	51222.9	72849.2	41548.3	32331.6	38465.9	32948.8	158576	155707	147987	-	-
pme0230	268.1	136.06	267.097	C10H13N5O4	[M+H]+	Adenosine	腺苷	Nucleotides and derivatives	核苷酸及其衍生物	Nucleotides and derivatives	核苷酸及其衍生物	58-61-7	1	3.84616e+07	1.47757e+07	2.20608e+07	4.69647e+07	6.39194e+07	6.46436e+07	4.5359e+07	4.5915e+07	4.06027e+07	5.31084e+07	5.35689e+07	5.01371e+07	C00212	ko00230,ko01100,ko01232,ko02010
pmp001141	506.2	145.06	505.195	C25H31NO10	[M+H]+	Cimicifugamide	升麻酰胺	Alkaloids	生物碱	Phenolamine	酚胺	-	2	638889	64943.7	75231.9	42615.5	77256.3	86229.4	15397.6	36580.2	69474.4	50568.8	53848	50732.8	-	-
Zmjp003031	611.16	449.11	610.153	C27H30O16	[M+H]+	Orientin-2''-O-galactoside	荭草素-2''-O-半乳糖苷	Flavonoids	黄酮	Flavones	黄酮	-	2	2.31279e+06	469160	2.86181e+06	1.27826e+06	1.47562e+06	871036	1.07807e+06	664414	713231	1.07829e+06	1.03248e+06	1.10887e+06	-	-
pme0014	148.06	84.04	147.053	C5H9NO4	[M+H]+	L-Glutamic acid	L-谷氨酸	Amino acids and derivatives	氨基酸及其衍生物	Amino acids and derivatives	氨基酸及其衍生物	56-86-0	1	3.72634e+07	2.52626e+07	4.35111e+07	1.08005e+07	1.43818e+07	8.82767e+06	1.85971e+07	2.38953e+07	1.11225e+07	1.93784e+07	2.08177e+07	2.0226e+07	C00025	ko00220,ko00250,ko00330,ko00332,ko00340,ko00430,ko00470,ko00480,ko00524,ko00630,ko00650,ko00660,ko00860,ko00910,ko00970,ko01100,ko01110,ko01200,ko01210,ko01230,ko01240,ko02010
Hmpp003270	449.11	287.05	448.101	C21H20O11	[M+H]+	Luteolin-4'-O-glucoside*	木犀草素-4'-O-葡萄糖苷*	Flavonoids	黄酮	Flavones	黄酮	6920-38-3	3	1.60222e+06	643516	1.25035e+06	527403	600673	253295	37716	110463	59431.9	779333	836821	817542	-	-
mws0884	328.05	134.05	329.053	C10H12N5O6P	[M-H]-	Cyclic 3',5'-Adenylic acid	环-3',5'-腺嘌呤核苷酸	Nucleotides and derivatives	核苷酸及其衍生物	Nucleotides and derivatives	核苷酸及其衍生物	60-92-4	1	234912	157356	175589	516891	1.33113e+06	949631	572224	200844	616335	798108	836043	857310	C00575	ko00230,ko01100
mws1155	181.07	101.02	182.079	C6H14O6	[M-H]-	D-Mannitol	D-甘露醇	Others	其它类	Saccharides	糖类	69-65-8	3	87035	38385.5	198137	309820	71696.4	29285.2	16191.3	27149.8	23199.9	34293.5	36875.2	35690.1	C00392	ko00051,ko01100,ko02010
pme3827	198.08	152.07	197.069	C9H11NO4	[M+H]+	3,4-Dihydroxy-L-phenylalanine (L-Dopa)	3,4-二羟基-L-苯丙氨酸 (左旋多巴)	Amino acids and derivatives	氨基酸及其衍生物	Amino acids and derivatives	氨基酸及其衍生物	59-92-7	3	146738	144761	144606	66506.2	124378	61186.9	332148	69137.9	68311.2	177167	187535	189801	C00355	ko00350,ko00950,ko00965,ko01100,ko01110
Zmcp102201	205.09	149.02	204.079	C12H12O3	[M+H]+	Senkyunolide B	洋川芎内酯 B	Others	其它类	Lactones	内酯类化合物	93236-67-0	1	2.36134e+06	2.58868e+06	3.0032e+06	1.42414e+06	1.31827e+06	998359	706423	935355	783639	1.52243e+06	1.56785e+06	1.45768e+06	C09921	-
pmn001610	307.26	307.26	308.272	C20H36O2	[M-H]-	Eicosadienoic acid	二十碳二烯酸	Lipids	脂质	Free fatty acids	游离脂肪酸	5598-38-9	3	848346	805404	836700	1.26742e+06	941638	857779	702553	511900	652229	934002	897909	966605	C16525	ko01040
Lmcp002302	312.13	180.09	311.123	C12H17N5O5	[M+H]+	N6-(2-Hydroxyethyl)adenosine	N6-(2-羟乙基)腺苷	Nucleotides and derivatives	核苷酸及其衍生物	Nucleotides and derivatives	核苷酸及其衍生物	4338-48-1	3	122403	94467	98373.3	73505.5	72903.2	46617.3	52450.9	68205.9	55564.6	115383	107228	112397	-	-
Lmhp008589	476.28	335.26	475.27	C23H42NO7P	[M+H]+	LysoPE 18:3(2n isomer)*	溶血磷脂酰乙醇胺 18:3(2n异构)*	Lipids	脂质	LPE	溶血磷脂酰乙醇胺	-	1	354377	183234	177110	353647	566558	311997	709320	407655	729796	976255	1.0419e+06	979774	-	-
Wbmn010451	487.34	487.34	488.35	C30H48O5	[M-H]-	2,3,23-Trihydroxyolean-12-en-28-oic acid methyl ester	2,3,23-三羟基齐墩果烷-12-烯-28-酸 甲酯	Terpenoids	萜类	Triterpene	三萜	-	1	2.70212e+06	3.67673e+06	2.05107e+06	5.10235e+07	2.38753e+06	1.15363e+06	749131	291712	457824	1.04385e+07	1.04149e+07	9.77026e+06	-	-
pmp000579	463.12	301.07	462.116	C22H22O11	[M+H]+	Diosmetin-7-O-galactoside	香叶木素-7-O-半乳糖苷	Flavonoids	黄酮	Flavones	黄酮	-	3	84817	93881.2	25213.4	144279	154496	136661	30872.6	63210.9	29428.8	59139.8	58048.9	55013.8	-	-
YC512118	282.28	247.24	281.272	C18H35NO	[M+H]+	Oleamide (9-Octadecenamide)	油酸酰胺 (9-十八碳烯酰胺)	Lipids	脂质	Free fatty acids	游离脂肪酸	301-02-0	1	12209.1	13397.1	15545.6	14155.2	16233.8	25309.8	15338.5	12416	16950.4	20616.9	19143	20090.2	C19670	-
Zmzp000145	189.16	84.08	188.153	C9H20N2O2	[M+H]+	Trimethyllysine	三甲基赖氨酸	Amino acids and derivatives	氨基酸及其衍生物	Amino acids and derivatives	氨基酸及其衍生物	23284-33-5	1	4.58023e+06	3.54816e+07	1.13973e+06	1.48646e+07	4.00589e+06	2.48586e+06	2.86977e+06	1.96921e+07	2.21236e+07	1.4522e+07	1.36483e+07	1.35919e+07	C03793	ko00310,ko01100
pmn001498	575.35	279.2	516.335	C33H44N2O3	[M+CH3COOH-H]-	Isodendrocrepine*	异玫瑰石斛碱*	Alkaloids	生物碱	Alkaloids	生物碱	50906-94-0	1	1.32493e+06	434650	1.03294e+06	1.16854e+06	1.15793e+06	1.24729e+06	752663	533929	659356	1.49116e+06	1.43186e+06	1.54354e+06	-	-
Lmmn003663	329.09	167.04	330.095	C14H18O9	[M-H]-	5-Glucosyloxy-2-Hydroxybenzoic acid methyl ester	5-葡萄糖氧基-2-羟基苯甲酸甲酯	Phenolic acids	酚酸类	Phenolic acids	酚酸类	-	2	35563.7	35721.1	35119.4	15051	37186.4	28380.6	10187.4	10839.5	16480.3	18627.3	19676.4	20032.5	-	-
mws0066	315.05	151	316.058	C16H12O7	[M-H]-	Isorhamnetin; 3'-Methoxy-3,4',5,7-Tetrahydroxyflavone	异鼠李素	Flavonoids	黄酮	Flavonols	黄酮醇	480-19-3	3	5970.96	17481.1	7586.17	12141.7	2656.49	10964	13622.5	23188.4	14438.1	18385.2	17147.5	17353.7	C10084	-
mws4052	102.06	56.05	101.048	C4H7NO2	[M+H]+	1-Aminocyclopropane-1-carboxylic acid	1-氨基环丙烷-1-羧酸	Organic acids	有机酸	Organic acids	有机酸	22059-21-8	3	507313	372474	497398	149861	341189	133269	453985	353037	220604	311744	314209	333790	C01234	ko00270,ko01100,ko01110
Zmgn000173	149.05	75.01	150.053	C5H10O5	[M-H]-	D-Ribose	D-核糖	Others	其它类	Saccharides	糖类	50-69-1	3	11577.1	35891.1	37506.8	17438.5	25063.8	21758.3	30161.2	62842.9	10642.6	27154.7	26464.2	25183.7	C00121	ko00030,ko01100,ko02010
Zmhn003257	299.06	284.04	300.063	C16H12O6	[M-H]-	5,7,2'-Trhiyroxy-8-methoxyflavone*	韧黄芩素 II*	Flavonoids	黄酮	Flavones	黄酮	-	3	5600.37	19090.2	3966.64	17396.3	10320.8	14553.8	6087.98	26994.1	6318.86	16872.9	18198.4	17751.3	-	-
Lskp211490	487.34	441.34	486.334	C30H46O5	[M+H]+	2,3,23-Trihydroxyurs-12,19-dien-28-oic acid	2,3,23-三羟基熊果-12,19-二烯-28-酸	Terpenoids	萜类	Triterpene	三萜	-	2	131009	317144	86952.6	205835	154012	74006.3	83817.6	46458.2	103797	126767	121573	117359	-	-
Zmdp000292	189.14	70.07	188.127	C7H16N4O2	[M+H]+	Arginine methyl ester	精氨酸甲酯	Amino acids and derivatives	氨基酸及其衍生物	Amino acids and derivatives	氨基酸及其衍生物	-	2	5.37389e+06	398385	784545	358507	2.80447e+06	1.77346e+06	1.02334e+06	1.24069e+06	304829	6.28893e+06	5.84653e+06	6.21402e+06	-	-
Lmqn000780	606.08	384.98	607.082	C17H27N3O17P2	[M-H]-	Uridine 5'-diphospho-N-acetylglucosamine	尿苷二磷酸乙酰葡萄糖胺	Nucleotides and derivatives	核苷酸及其衍生物	Nucleotides and derivatives	核苷酸及其衍生物	528-04-1	2	19158.1	25496.4	34929.7	34182.8	31011.8	19834.4	12221.7	19806.3	41265.4	20122.3	20654	19126.3	C00043	ko00520,ko00524,ko01100,ko01250
Cmzn005251	433.11	271.06	434.121	C21H22O10	[M-H]-	6-O-Caffeoylarbutin	6-O-咖啡酰熊果苷	Phenolic acids	酚酸类	Phenolic acids	酚酸类	136172-60-6	2	204703	121705	64120.7	166610	135339	112838	80746.4	74384.4	78326.6	75758.7	71492.3	70431.8	-	-
MWS2070	179.07	92.03	180.079	C10H12O3	[M-H]-	Propyl 4-hydroxybenzoate	4-羟基苯甲酸丙酯	Phenolic acids	酚酸类	Phenolic acids	酚酸类	94-13-3	1	2.96941e+06	2.66061e+06	4.26374e+06	2.20581e+06	2.21439e+06	1.37404e+06	1.66625e+06	1.51044e+06	1.0802e+06	1.79167e+06	1.93609e+06	1.85251e+06	-	-
MWSHY0027	373.13	343.09	372.121	C20H20O7	[M+H]+	Tangeretin (4',5,6,7,8-Pentamethoxyflavone)*	桔皮素 (4',5,6,7,8-五甲氧基黄酮)*	Flavonoids	黄酮	Flavones	黄酮	481-53-8	1	8291.41	35523.4	5651.1	36986	6097.47	13126.9	1838.37	76114.1	9144.35	21246.3	21234.5	19837.1	C10190	-
Lmsn013282	469.33	407.33	470.34	C30H46O4	[M-H]-	3-Oxo-19-hydroxyurs-12-en-28-oic acid (Pomonic acid)	3-氧代-19-羟基熊果-12-烯-28-酸 (坡模酮酸)	Terpenoids	萜类	Triterpene	三萜	13849-90-6	1	278909	74684.1	96171.8	342312	185703	74143.3	42793.3	11135.3	14556.9	101628	108234	100762	-	-
pme0295	146.08	86.06	145.074	C6H11NO3	[M+H]+	4-Acetamidobutyric acid	4-乙酰氨基丁酸	Organic acids	有机酸	Organic acids	有机酸	3025-96-5	3	135792	172603	69251.8	167331	249681	81177	104872	91448.9	173755	173289	178929	187411	C02946	ko00330,ko01100
Hmqp006235	516.3	184.07	515.301	C26H46NO7P	[M+H]+	LysoPC 18:4	溶血磷脂酰胆碱 18:4	Lipids	脂质	LPC	溶血磷脂酰胆碱	-	3	219325	33364.3	59145.2	116760	92948.6	65317.6	184877	66604.7	67898.8	234246	237889	220534	-	-
Lmbn003970	329.23	211.14	330.241	C18H34O5	[M-H]-	9,12,13-TriHOME; 9(S),12(S),13(S)-Trihydroxy-10(E)-octadecenoic acid	9(S),12(S),13(S)-三羟基-10(E)-十八烯酸	Lipids	脂质	Free fatty acids	游离脂肪酸	97134-11-7	2	6145.72	5371.86	6683.8	9769.13	11354.4	14919.3	2161.33	5039.24	5902.48	11731.6	10834.6	11240.2	C14833	ko00591
mws0260	175.12	116.07	174.112	C6H14N4O2	[M+H]+	L-Arginine	L-精氨酸	Amino acids and derivatives	氨基酸及其衍生物	Amino acids and derivatives	氨基酸及其衍生物	74-79-3	1	7.49941e+07	3.24601e+06	2.68149e+07	8.7998e+06	117899693	3.94683e+07	2.50547e+08	5.9064e+07	7.50696e+06	1.20539e+08	1.26879e+08	1.17338e+08	C00062	ko00220,ko00261,ko00330,ko00470,ko00970,ko01100,ko01110,ko01230,ko02010
pmb0981	348.07	136.06	347.063	C10H14N5O7P	[M+H]+	Adenosine 5'-monophosphate	腺苷-5'-单磷酸	Nucleotides and derivatives	核苷酸及其衍生物	Nucleotides and derivatives	核苷酸及其衍生物	61-19-8	3	1.15894e+06	774330	1.36697e+06	1.76073e+06	1.84188e+06	1.55674e+06	1.80852e+06	1.432e+06	1.67451e+06	1.93702e+06	1.8312e+06	1.98072e+06	C00020	ko00230,ko00908,ko01100,ko01110,ko01232,ko01240
Hayp002810	287.1	227.08	286.095	C15H14N2O4	[M+H]+	Dichotomine C	Dichotomine C	Alkaloids	生物碱	Alkaloids	生物碱	-	1	184790	55257.7	209196	151257	23777.7	35000.2	43072.1	29423.4	18123.6	101568	94796.7	94766.5	-	-
Wmzn006169	471.35	407.33	472.355	C30H48O4	[M-H]-	3,16-Dihydroxyolean-12-en-28-oic acid (Echinocystic acid)	3,16-二羟基齐墩果-12-烯-28-酸 (刺囊酸)	Terpenoids	萜类	Triterpene	三萜	510-30-5	1	115195	64715.5	34570	365331	67102.7	24131.3	13410.2	11243.3	13481.3	73946.1	68269.4	70373	C08942	-
MWStz070	182.08	91.05	181.074	C9H11NO3	[M+H]+	N-(2-Hydroxy-4-methoxyphenyl)acetamide	N-(2-羟基-4-甲氧基苯基)乙酰胺	Alkaloids	生物碱	Phenolamine	酚胺	58469-06-0	1	2.66935e+06	2.82098e+06	1.15678e+06	2.27278e+06	4.5772e+06	1.66213e+06	7.51273e+06	3.95847e+06	2.07929e+06	4.86735e+06	5.26417e+06	5.17385e+06	-	-
Zbdn002066	301.09	123.01	302.1	C13H18O8	[M-H]-	Tachioside*	它乔糖苷*	Phenolic acids	酚酸类	Phenolic acids	酚酸类	109194-60-7	1	567035	487756	338327	140858	289282	136118	110096	70009.7	120256	427034	452230	418247	-	-
Lmhp012042	355.28	263.24	354.277	C21H38O4	[M+H]+	2-Linoleoylglycerol*	2-亚油酰甘油酯*	Lipids	脂质	Glycerol ester	甘油酯	3443-82-1	1	140152	122948	177051	80048	126386	99323.4	76349.5	55623.3	42923.7	130706	121742	122040	-	-
Hmln000297	179.05	59.01	180.063	C6H12O6	[M-H]-	Inositol	肌醇	Others	其它类	Saccharides	糖类	87-89-8	3	830489	1.76952e+06	1.2005e+06	1.06178e+06	1.279e+06	783105	447711	761221	649353	939002	1.01502e+06	999479	C00137	ko00052,ko00053,ko00562,ko01100,ko01110,ko01250,ko02010,ko04070
pmb2922	565.05	323.03	566.055	C15H24N2O17P2	[M-H]-	Uridine 5'-diphospho-D-glucose	尿苷 5'-二磷酸-D-葡萄糖	Nucleotides and derivatives	核苷酸及其衍生物	Nucleotides and derivatives	核苷酸及其衍生物	133-89-1	2	1.16298e+06	809997	923585	326654	176735	135171	237481	203215	129364	743227	684727	720648	C00029	ko00040,ko00052,ko00053,ko00500,ko00520,ko00524,ko00561,ko00908,ko01100,ko01110,ko01240,ko01250
pme0193	147.08	84.04	146.069	C5H10N2O3	[M+H]+	L-Glutamine	L-谷氨酰胺	Amino acids and derivatives	氨基酸及其衍生物	Amino acids and derivatives	氨基酸及其衍生物	56-85-9	3	2.08201e+07	7.53336e+06	2.05607e+07	2.37703e+07	6.2126e+07	3.14616e+07	1.11207e+08	3.64399e+07	2.84394e+07	3.50186e+07	3.76617e+07	3.76339e+07	C00064	ko00220,ko00230,ko00240,ko00250,ko00470,ko00630,ko00750,ko00910,ko00970,ko01100,ko01230,ko01232,ko01240,ko02010
mws1397	441.08	169.02	442.09	C22H18O10	[M-H]-	Epicatechin gallate*	表儿茶素没食子酸酯*	Flavonoids	黄酮	Flavanols	黄烷醇类	1257-08-5	1	39954.8	47210.6	43876.5	354448	232314	188271	64792.1	65993.5	34227.2	112014	103747	105173	-	-
Lmyn008503	143.11	143.11	144.115	C8H16O2	[M-H]-	Octanoic acid	辛酸	Lipids	脂质	Free fatty acids	游离脂肪酸	124-07-2	2	10173.2	7357.31	11208.1	7849.47	8023.99	2968.99	3221.48	3970.89	3554.69	4947.51	5031.45	5350.44	C06423	ko00061,ko00785,ko01100,ko01240
MWSslk185	389.12	359.08	388.116	C20H20O8	[M+H]+	5-Demethylnobiletin	去甲基川陈皮素	Flavonoids	黄酮	Flavones	黄酮	2174-59-6	1	13615.9	51355.6	4257.76	82488.2	5338.25	25987.7	1510.25	95492.4	14762.2	26774.4	28368.6	29054.6	-	-
HJAP023	773.22	611.17	772.206	C33H40O21	[M+H]+	Kaempferol-6,8-di-C-glucoside-7-O-glucoside	山柰酚-6,8-二-C-葡萄糖苷-7-O-葡萄糖苷	Flavonoids	黄酮	Flavonols	黄酮醇	-	2	126263	37862.4	199334	248375	165594	105487	181445	224669	218833	177385	191404	179235	-	-
Lmhn005110	299.06	284.02	300.063	C16H12O6	[M-H]-	Aracarpene 1	9-甲氧基-6H-[1]苯并呋喃[3,2-c]色烯-3,4,10-三醇	Flavonoids	黄酮	Isoflavones	异黄酮	1261245-78-6	3	363443	7772.83	63859.3	163907	15627.5	15790.6	8880.56	8503.37	8585.26	108493	117874	112373	-	-
MWSmce674	451.36	89.06	450.35	C31H46O2	[M+H]+	Phylloquinone (Vitamin K1)	叶绿醌 (维生素K1)	Others	其它类	Vitamin	维生素	84-80-0	3	18069.8	16648.7	10558.6	12633.1	20017.4	9578.74	10315.2	18003.2	22562.5	21281.6	23126.7	21937.3	-	-
pmn001497	575.35	279.2	516.335	C33H44N2O3	[M+CH3COOH-H]-	Dendrocrepine*	玫瑰石斛碱*	Alkaloids	生物碱	Alkaloids	生物碱	51020-39-4	1	397632	96979.5	279764	208744	258907	194808	269417	144225	102455	343521	340857	367880	-	-
Lmbn001609	145.05	83.05	146.058	C6H10O4	[M-H]-	2-Acetyl-2-Hydroxybutanoic Acid	2-乙酰-2-羟基丁酸	Organic acids	有机酸	Organic acids	有机酸	-	3	50606.5	29970.8	42442.4	10425.4	17838.1	9309.19	11360.4	11108.4	44803.8	39626.5	38863	36487.3	C06006	ko00290,ko01100,ko01110,ko01210,ko01230
mws0254	156.08	110.07	155.07	C6H9N3O2	[M+H]+	L-Histidine	L-组氨酸	Amino acids and derivatives	氨基酸及其衍生物	Amino acids and derivatives	氨基酸及其衍生物	71-00-1	3	3.55383e+06	2.84975e+06	2.80414e+06	3.46036e+06	2.05345e+07	3.83016e+06	4.35776e+07	9.55303e+06	5.82828e+06	8.16643e+06	8.49033e+06	7.79379e+06	C00135	ko00340,ko00410,ko00470,ko00970,ko01100,ko01110,ko01230,ko02010
Zbsp011022	425.38	191	424.371	C30H48O	[M+H]+	Lup-20(29)-en-3-one (Lupenone)	羽扇豆-20(29)-烯-3-酮 (羽扇豆烯酮)	Terpenoids	萜类	Triterpene	三萜	1617-70-5	2	26128.9	6042.74	26006.8	109531	93963.4	19332.1	5484.96	2887.18	2435.57	47214.8	47225.6	50811.3	C16990	-
pmb0801	346.11	184.06	345.106	C14H19NO9	[M+H]+	4-Pyridoxic acid-O-glucoside	4-吡哆酸-O-葡萄糖苷	Others	其它类	Vitamin	维生素	-	3	121942	46185.3	90497.9	22456.7	373227	22283.9	13540.6	16042.9	8713.7	35547.6	37811.3	34856.1	-	-
pme3227	579.17	433.11	578.164	C27H30O14	[M+H]+	Vitexin-2''-O-rhamnoside	牡荆素-2''-O-鼠李糖苷	Flavonoids	黄酮	Flavones	黄酮	64820-99-1	2	210718	380641	134841	1.30673e+06	2.60339e+06	345012	118214	170228	63825.9	642403	637037	688219	C12628	ko00944
Lmhp009497	502.29	361.27	501.286	C25H44NO7P	[M+H]+	LysoPE 20:4*	溶血磷脂酰乙醇胺 20:4*	Lipids	脂质	LPE	溶血磷脂酰乙醇胺	-	2	23384.7	5775.23	26795.7	58850.1	11205.2	5844.33	20467.1	14222.8	13587.8	15698	16903.9	16949.4	-	-
Lmhp009349	502.29	361.27	501.286	C25H44NO7P	[M+H]+	LysoPE 20:4(2n isomer)*	溶血磷脂酰乙醇胺 20:4(2n异构)*	Lipids	脂质	LPE	溶血磷脂酰乙醇胺	-	2	23384.7	5775.23	26795.7	58850.1	11205.2	5844.33	20467.1	14222.8	13587.8	15698	16903.9	16949.4	-	-
Zmjp003179	581.15	449.11	580.143	C26H28O15	[M+H]+	Orientin-2''-O-xyloside	荭草素-2''-O-木糖苷	Flavonoids	黄酮	Flavones	黄酮	-	2	11136.4	9154.86	86984.5	548485	121302	13582.5	6025.69	9474.58	6988.31	485982	517795	528121	-	-
MWSHY0013	255.07	181.06	254.058	C15H10O4	[M+H]+	3,4'-Dihydroxyflavone	3,4'-二羟基黄酮	Flavonoids	黄酮	Flavones	黄酮	14919-49-4	2	6.25423e+07	4.25857e+06	4.27552e+07	4.31427e+07	1.09964e+07	2.95962e+07	8.02443e+06	1.74426e+06	1.81758e+07	3.0474e+07	3.31319e+07	3.12875e+07	-	-
Zmyn004676	293.21	113.1	294.219	C18H30O3	[M-H]-	17-Hydroxylinolenic acid	17-羟基亚麻酸	Lipids	脂质	Free fatty acids	游离脂肪酸	-	2	62230.2	81703.7	97940.1	302936	143366	142332	59363.6	95881.1	68916.1	137756	127958	138315	C16346	ko00592
pmp000411	565.16	433.1	564.148	C26H28O14	[M+H]+	Genistein-8-C-apiosyl(1→6)glucoside	染料木素-8-C-芹糖基(1→6)葡萄糖苷	Flavonoids	黄酮	Isoflavones	异黄酮	-	3	84491.7	501059	435747	467407	1.3458e+06	205037	11320.5	32813.1	37318.4	378053	366540	346873	-	-
Lmjn003562	693.2	175.04	694.211	C32H38O17	[M-H]-	3,6'-Diferuloylsucrose	3,6'-二阿魏酰蔗糖	Phenolic acids	酚酸类	Phenolic acids	酚酸类	107172-40-7	1	126792	29809.3	9936.22	7858.57	10768.1	6037.6	20074.3	6095.93	7161.61	99828.7	107986	100780	-	-
pmf0138	179.06	59.01	180.063	C6H12O6	[M-H]-	D-Mannose	甘露糖	Others	其它类	Saccharides	糖类	3458-28-4	3	902737	1.59645e+06	1.02387e+06	791321	963712	654470	410790	661553	562713	980343	994590	915794	C00159	ko00051,ko00052,ko00520,ko01100,ko01250,ko02010
Zblp004317	206.08	120.09	205.074	C11H11NO3	[M+H]+	(S)-3-(2-oxopropyl)-3-hydroxyindolin-2-one	(S)-3-(2-氧丙基)-3-羟基吲哚-2-酮	Alkaloids	生物碱	Plumerane	吲哚类生物碱	-	2	333892	264127	288184	214074	211095	191475	265150	131148	215824	227206	247670	235141	-	-
Lmbn005369	295.23	195.14	296.235	C18H32O3	[M-H]-	13(S)-HODE;13(S)-Hydroxyoctadeca-9Z,11E-dienoic acid*	13-羟基十八烷基-9,11-二烯酸*	Lipids	脂质	Free fatty acids	游离脂肪酸	10219-69-9	1	126400	161661	188716	595182	677428	1.03354e+06	129822	195667	142376	385217	357665	357139	C14762	ko00591
Zmhn001883	329.09	209.04	330.095	C14H18O9	[M-H]-	Vanillic acid-4-O-glucoside	香草酸-4-O-葡萄糖苷	Phenolic acids	酚酸类	Phenolic acids	酚酸类	32142-31-7	3	13040.6	16012.3	7467.37	12166.7	8147.69	14690.4	4640.81	9078.13	9459.92	13126.3	14337.6	13815	-	-
Zmdp001647	247.13	184.1	246.122	C10H18N2O5	[M+H]+	γ-Glutamyl-L-valine	γ-谷氨酰胺缬氨酸	Amino acids and derivatives	氨基酸及其衍生物	Amino acids and derivatives	氨基酸及其衍生物	-	3	25572.2	9489.25	21217.1	19264.4	39986.7	8493.25	17303.9	5494.95	662.6	31115.9	33735.6	33504.6	-	-
MWSHY0171	579.15	409.09	578.142	C30H26O12	[M+H]+	Procyanidin B2	原花青素 B2	Tannins	鞣质	Proanthocyanidins	原花青素	29106-49-8	1	2.39633e+06	7.30001e+06	327600	4.7412e+06	4.54828e+06	3.56583e+06	3.69455e+06	1.72688e+06	2.12624e+06	2.76017e+06	3.00814e+06	2.8326e+06	C17639	-
pmp000548	301.07	286.05	300.063	C16H12O6	[M+H]+	Pratensein*	红车轴草素*	Flavonoids	黄酮	Isoflavones	异黄酮	2284-31-3	3	16858.9	38789.7	7952.07	43285.3	29710.6	29999.9	10927.1	90283	12866.2	62135.8	62673.6	57736.3	C10520	ko00943
Zmhp003514	301.07	286.05	300.063	C16H12O6	[M+H]+	6,7,8-Tetrahydroxy-5-methoxyflavone*	6,7,8-三羟基-5-甲氧基黄酮*	Flavonoids	黄酮	Flavones	黄酮	-	3	16858.9	38789.7	7952.07	43285.3	29710.6	29999.9	10927.1	90283	12866.2	62135.8	62673.6	57736.3	-	-
Zmyn007277	282.08	238.09	283.084	C16H13NO4	[M-H]-	Avenanthramide D	燕麦蒽酰胺 D	Alkaloids	生物碱	Phenolamine	酚胺	-	1	1.21521e+06	88414.3	127762	392709	46154.5	160222	61547.9	28145.3	104136	966025	917920	884080	-	-
mws1488	255.23	237.22	256.24	C16H32O2	[M-H]-	Palmitic acid	棕榈酸	Lipids	脂质	Free fatty acids	游离脂肪酸	57-10-3	3	60950.5	75825.1	72353.4	81243.5	67473.4	58853.2	69905.3	65112.2	56579	64915.4	60121.3	65145.6	C00249	ko00061,ko00062,ko00071,ko00073,ko01040,ko01100,ko01212
HJN097	1133.54	1133.54	1134.55	C54H86O25	[M-H]-	Azukisaponin VI	赤豆皂苷 VI	Terpenoids	萜类	Triterpene Saponin	三萜皂苷	82801-39-6	2	2.01994e+06	3.3945e+06	2.50971e+06	1.17125e+06	1.5276e+06	1.77592e+06	1.41218e+06	1.05993e+06	1.68989e+06	1.8545e+06	1.97279e+06	2.02562e+06	-	-
pmb0876	454.29	313.27	453.286	C21H44NO7P	[M+H]+	LysoPE 16:0*	溶血磷脂酰乙醇胺 16:0*	Lipids	脂质	LPE	溶血磷脂酰乙醇胺	53862-35-4	1	3.29545e+06	4.38021e+06	2.94222e+06	6.72708e+06	1.05772e+07	6.75712e+06	1.67632e+07	9.98861e+06	1.31167e+07	9.19107e+06	1.00158e+07	9.39384e+06	-	-
pmb0782	86.1	69.07	85.0891	C5H11N	[M+H]+	Piperidine	哌啶	Alkaloids	生物碱	Piperidine alkaloids	哌啶类生物碱	110-89-4	3	1.04177e+06	905428	427343	498622	3.68054e+06	614989	6.09478e+06	507607	785693	1.73873e+06	1.89013e+06	1.76363e+06	C01746	ko00960
Qayp004861	507.33	301.18	506.324	C29H46O7	[M+H]+	2-Acetyl-Ecdysone	2-乙酰基-蜕皮甾酮	Steroids	甾体	Steroid	甾体	-	2	18595.3	39416.6	50179.1	48745.3	33000	43457.9	103129	44361.3	21385.3	71710.3	67360.4	65745.9	-	-
Hamp004722	179.07	119.05	178.063	C10H10O3	[M+H]+	isosclerone	isosclerone	Others	其它类	Others	其它	-	3	257470	132985	209920	218782	276700	80676.7	64085.9	91161.9	63103.7	300332	295096	275442	-	-
pmn001694	329.23	229.15	330.241	C18H34O5	[M-H]-	9,10,13-Trihydroxy-11-Octadecenoic Acid	9,10,13-三羟基-11-十八碳烯酸	Lipids	脂质	Free fatty acids	游离脂肪酸	29907-57-1	2	160486	118677	192398	247631	310647	307566	115423	158613	137209	241099	263670	248886	C14835	ko00591
mws0214	181.07	71.01	182.079	C6H14O6	[M-H]-	D-Sorbitol	D-山梨糖醇	Others	其它类	Saccharides	糖类	50-70-4	3	212836	77701.4	532734	636407	140406	80829.6	21220.6	45553.1	37076	76479.1	77157.8	70859.7	C00794	ko00051,ko00052,ko01100,ko02010
Zahp011689	205.09	149.02	204.079	C12H12O3	[M+H]+	2,2-dimethylchromene-6-carboxylic acid	2,2-dimethylchromene-6-carboxylic acid	Others	其它类	Others	其它	34818-56-9	3	1.89148e+06	1.98557e+06	2.58791e+06	1.21179e+06	1.10128e+06	787688	649119	857838	643865	1.31204e+06	1.19602e+06	1.25405e+06	-	-
Lmqn008288	299.26	299.26	300.266	C18H36O3	[M-H]-	3-Hydroxyoctadecanoic Acid	3-羟基十八烷酸	Lipids	脂质	Free fatty acids	游离脂肪酸	45261-96-9	2	8.66472e+06	1.84408e+06	4.07454e+07	4.30996e+07	6.45141e+06	847403	1.01515e+06	1.41796e+07	3.41e+07	2.5379e+07	2.32502e+07	2.50193e+07	-	-
Jmwn002117	331.1	153.02	332.111	C14H20O9	[M-H]-	2-(3,4-dihydroxyphenyl)ethanediol 1-O-β-D-glucopyranoside	2-(3,4-二羟苯基)乙二醇-1-O-β-D-吡喃葡萄糖苷	Phenolic acids	酚酸类	Phenolic acids	酚酸类	-	1	421328	218579	260528	118810	175812	90260	228495	79162.4	356993	291131	312412	286430	-	-
Lmzn005892	485.33	423.33	486.334	C30H46O5	[M-H]-	Isoceanothic acid	异美洲茶酸	Terpenoids	萜类	Triterpene	三萜	-	2	1.07769e+06	1.17875e+06	709423	2.51587e+06	829164	465957	320235	253528	200208	866080	919207	951286	-	-
pmn001581	315.05	241.05	316.058	C16H12O7	[M-H]-	Sexangularetin	3,5,7,4'-四羟基-8-甲氧基黄酮	Flavonoids	黄酮	Flavonols	黄酮醇	571-74-4	3	269194	7274.5	11569.2	6775.37	5539.22	3653.4	5595.07	6132.48	9821.25	45646.7	42446.1	46459.7	C10185	-
mws1337	220.12	90.05	219.111	C9H17NO5	[M+H]+	D-Pantothenic Acid	D-泛酸(维生素B5)	Others	其它类	Vitamin	维生素	79-83-4	1	9.71764e+06	9.4642e+06	1.20896e+07	7.78567e+06	9.58076e+06	9.02719e+06	8.67235e+06	8.20066e+06	7.21559e+06	5.04663e+06	5.38668e+06	4.91661e+06	C00864	ko00410,ko00770,ko01100,ko01110,ko01240
Lmnn102709	537.2	195.06	538.205	C26H34O12	[M-H]-	(-)-olivil-4'-O-bate-D-glucopyranoside	(-)-橄榄树脂素-4-O-β-D-吡喃型葡萄糖	Lignans and Coumarins	木脂素和香豆素	Lignans	木脂素	-	1	2.18183e+06	229244	465168	455030	513512	158918	16237	29798.4	50174	1.80659e+06	1.82964e+06	1.97137e+06	-	-
Zmcn009787	469.33	439.32	470.34	C30H46O4	[M-H]-	23-Hydroxy-3-oxoolean-12-en-28-oic acid (Hederagonic acid)	23-羟基-3-氧代齐墩果-12-烯-28-酸 (常春藤酮酸)	Terpenoids	萜类	Triterpene	三萜	466-01-3	1	221852	61486.1	163575	369377	174566	66675.6	51699.9	8966.44	7093.9	100241	102061	93099.5	-	-
Lmqn000432	333.06	333.06	334.067	C9H19O11P	[M-H]-	1-(sn-Glycero-3-phospho)-1D-myo-inositol	1-(sn-甘油-3-磷酸)-1D-肌醇	Others	其它类	Saccharides	糖类	-	2	85722.6	2.63525e+06	869367	3.8293e+06	3.03706e+06	3.03739e+06	151596	860293	1.25815e+06	638429	702237	663085	-	-
pme0432	575.12	285.04	576.127	C30H24O12	[M-H]-	Procyanidin A2	原花青素 A2	Tannins	鞣质	Proanthocyanidins	原花青素	41743-41-3	3	79006.9	81108.1	97984.2	572017	233885	485030	410375	520984	444542	146946	135777	148466	C10237	-
Lmyn003971	521.2	359.15	522.21	C26H34O11	[M-H]-	Dihydrodehydrodiconiferyl alcohol-4-O-glucoside	二氢脱氢双松柏醇-4-O-葡萄糖苷	Lignans and Coumarins	木脂素和香豆素	Lignans	木脂素	-	2	483517	205557	334755	87414.3	252215	112845	30885.5	35861	24038.1	140871	143970	154395	-	-
zjmp120230	469.33	405.31	468.324	C30H44O4	[M+H]+	11,12-epoxy-13-hydroxy-3-Oxooleanane-28-oic acid gamma-lactone (Liquidambaric Lactone)	11,12-环氧-13-羟基-3-氧代齐墩果烷-28-酸 γ-内酯 (路路通内酯)	Terpenoids	萜类	Triterpene	三萜	185051-75-6	2	104747	73207.5	64550.2	52367.9	67803.7	18290.2	16629.9	19333.3	22754.4	76704.6	83494.6	76942.5	-	-
mws0567	146.09	87.04	145.085	C5H11N3O2	[M+H]+	4-Guanidinobutyric acid	4-胍基丁酸	Organic acids	有机酸	Organic acids	有机酸	463-00-3	3	2.01933e+06	1.06472e+06	1.86748e+06	1.02401e+06	1.85089e+06	945580	788950	666516	1.05009e+06	996959	1.09747e+06	1.02957e+06	C01035	ko00330,ko01100
MWS4354	282.12	150.08	281.112	C11H15N5O4	[M+H]+	N6-methyladenosine	N6-甲基腺苷	Nucleotides and derivatives	核苷酸及其衍生物	Nucleotides and derivatives	核苷酸及其衍生物	1867-73-8	3	221455	124197	159738	142137	305267	108119	62351.6	65400.1	61855.2	146734	140175	132940	-	-
mws5042	223.11	120.09	222.1	C11H14N2O3	[M+H]+	L-Glycyl-L-phenylalanine*	L-甘氨酰-L-苯丙氨酸*	Amino acids and derivatives	氨基酸及其衍生物	Amino acids and derivatives	氨基酸及其衍生物	721-66-4	2	220705	162611	320395	537152	411334	436108	308390	318340	317842	380908	398831	361251	-	-
MWS4295	299.26	253.25	300.266	C18H36O3	[M-H]-	DL-2-hydroxystearic acid*	DL-2-羟基硬脂酸*	Lipids	脂质	Free fatty acids	游离脂肪酸	629-22-1	3	75718.9	86122.6	158644	104069	130584	87448.7	93989.3	69290.5	51760.4	73077.1	70226.1	66204.6	-	-
pme2827	239.24	223.24	240.245	C16H32O	[M-H]-	Palmitaldehyde	棕榈醛	Lipids	脂质	Free fatty acids	游离脂肪酸	629-80-1	3	4.65136e+07	4.70316e+07	4.53065e+07	3.97877e+07	4.83346e+07	4.80413e+07	4.41367e+07	4.11763e+07	4.54382e+07	3.10469e+07	3.41335e+07	3.18532e+07	C00517	ko00071
pmb0789	332.13	152.07	331.127	C14H21NO8	[M+H]+	Pyridoxine-5'-O-glucoside	吡哆醇-5'-O-葡萄糖苷	Others	其它类	Vitamin	维生素	-	3	864075	195346	855003	121708	132065	93556.7	75816.5	76590.8	70137.5	342303	350761	318031	C03996	-
Lmzn006024	483.31	483.31	484.319	C30H44O5	[M-H]-	2-Aldehydo-A(1)-norlup-20(29)-en-27,28-dioic acid (Zizyberanal acid)	2-醛基-A(1)-降羽扇豆烷-20(29)-烯-27,28-二酸 (大枣新酸)	Terpenoids	萜类	Triterpene	三萜	1167421-91-1	1	2.51244e+06	693305	822815	7.58452e+06	2.06181e+06	541551	161173	133374	102570	987646	1.01376e+06	918213	-	-
Lcsn000193	597.22	327.12	598.226	C28H38O14	[M-H]-	isatioxyneolignoside E	isatioxyneolignoside E	Lignans and Coumarins	木脂素和香豆素	Lignans	木脂素	-	3	3.18241e+06	1.32567e+06	748244	228906	415798	200516	189973	114303	55033	1.42529e+06	1.57176e+06	1.53851e+06	-	-
pme1014	445.31	341.28	444.303	C31H40O2	[M+H]+	Menatetrenone (Vitamin K2)	四烯甲萘醌 (维生素 K2)	Others	其它类	Vitamin	维生素	11032-49-8	3	859761	708705	1.16675e+06	623868	569048	505607	802039	409665	268828	509453	503911	552613	-	-
Zazp002547	205.1	146.06	204.09	C11H12N2O2	[M+H]+	cyclo-(Gly-Phe)	环(丙氨酰-苯丙氨酸)	Amino acids and derivatives	氨基酸及其衍生物	Amino acids and derivatives	氨基酸及其衍生物	10125-07-2	2	5.4049e+07	6.26663e+07	8.26038e+06	3.04212e+07	6.8187e+07	3.81113e+07	6.06599e+07	1.52572e+07	1.21967e+07	4.32201e+07	4.72904e+07	4.33246e+07	-	-
Zmzn000113	146.05	102.06	147.053	C5H9NO4	[M-H]-	L-threo-3-Methylaspartate	L-苏式-3-甲基天冬氨酸	Amino acids and derivatives	氨基酸及其衍生物	Amino acids and derivatives	氨基酸及其衍生物	6061-13-8	3	248954	207693	194179	77946.5	134467	59038.3	210902	144285	94013.3	224377	207838	203476	C03618	ko00630,ko00660,ko01100,ko01200
Zjlp100901	471.35	425.34	470.34	C30H46O4	[M+H]+	3-Hydroxy-23-oxoolean-12-en-28-oic acid (Gypsogenin)	3-羟基-23-氧代齐墩果-12-烯-28-酸 (丝石竹皂苷元)	Terpenoids	萜类	Triterpene	三萜	-	1	8.06236e+06	8.01432e+06	8.25526e+06	7.72591e+06	7.28145e+06	7.58955e+06	8.39407e+06	7.58772e+06	7.49151e+06	7.05791e+06	7.82822e+06	7.38612e+06	-	-
MWSslk181	419.13	257.09	418.126	C21H22O9	[M+H]+	Isoliquiritin	异甘草苷	Flavonoids	黄酮	Chalcones	查耳酮	5041-81-6	2	843213	110175	826037	656259	191509	71380	24407.6	18488.3	10238.4	380172	369024	408179	C16978	-
Lmmn003323	271.23	225.22	272.235	C16H32O3	[M-H]-	2-Hydroxyhexadecanoic acid	2-羟基十六烷酸	Organic acids	有机酸	Organic acids	有机酸	764-67-0	1	656539	477765	1.12799e+06	659215	591091	440735	600409	373593	307957	641888	709137	696621	-	-
Hmmp001310	188.07	118.07	187.063	C11H9NO2	[M+H]+	3-Indoleacrylic acid	3-吲哚丙烯酸	Alkaloids	生物碱	Plumerane	吲哚类生物碱	1204-06-4	1	7.33483e+06	9.36229e+06	679505	3.18719e+06	1.67701e+07	3.57134e+06	8.82384e+06	1.9317e+06	1.17286e+06	4.84794e+06	5.00772e+06	5.36803e+06	C21283	-
Zmgn000217	129.02	85.03	130.027	C5H6O4	[M-H]-	Methylenesuccinic acid	亚甲基琥珀酸	Organic acids	有机酸	Organic acids	有机酸	97-65-4	3	30959	61019.3	123170	33292.9	52676.7	16577.5	233457	54752.9	68797.5	49495.2	47197.1	52437.2	C00490	ko00660,ko01100
Wagp007602	331.08	316.09	330.074	C17H14O7	[M+H]+	Demethoxysudachitin	Demethoxysudachitin	Flavonoids	黄酮	Flavones	黄酮	4323-80-2	3	765.947	1517.99	1717.29	1366.24	3713.5	671.534	894.092	310682	1983.23	329098	298923	302891	-	-
pmb2804	311.22	171.14	312.23	C18H32O4	[M-H]-	13S-Hydroperoxy-9Z,11E-octadecadienoic acid	13-氢过氧化-9,11-十八碳二烯酸	Lipids	脂质	Free fatty acids	游离脂肪酸	33964-75-9	3	11628.5	13440	15519.7	29375.5	12934.7	12973.7	5148.46	15189.6	11827.9	18182	19118	17194.5	C04717	ko00591,ko01100
Wafn011571	295.23	195.14	296.235	C18H32O3	[M-H]-	alpha-Hydroxylinoleic acid*	α-羟基亚油酸*	Lipids	脂质	Free fatty acids	游离脂肪酸	57818-44-7	1	134679	164815	193481	666949	708424	929384	140804	199592	138226	365097	378494	404975	-	-
mws1608	447.09	357.06	448.101	C21H20O11	[M-H]-	Luteolin-6-C-glucoside (Isoorientin)	木犀草素-6-C-葡萄糖苷 (异荭草素)	Flavonoids	黄酮	Flavones	黄酮	4261-42-1	3	7078.75	12744.9	14628.2	29796.2	45951.3	11805.7	11896.8	12337.5	7630.48	92302	100862	91966.7	C01821	-
Zmzn003953	309.2	227.2	310.214	C18H30O4	[M-H]-	13(s)-hydroperoxy-(9z,11e,15z)-octadecatrienoic acid	13-氢过氧化-9z,11e,15z-十八碳三烯酸	Lipids	脂质	Free fatty acids	游离脂肪酸	67597-26-6	1	194961	293420	198294	275451	245782	243310	222780	175167	174639	262784	236314	251134	C04785	ko00592,ko01100,ko01110
MWS04447	130.09	70.07	129.079	C6H11NO2	[M+H]+	Homoproline	高脯氨酸	Amino acids and derivatives	氨基酸及其衍生物	Amino acids and derivatives	氨基酸及其衍生物	56879-46-0	3	1.03964e+07	1.09076e+06	4.48597e+06	1.96579e+06	2.16196e+07	4.27137e+06	3.38951e+07	5.89355e+06	685156	1.31568e+07	1.45513e+07	1.42999e+07	-	-
Zbbp006589	433.15	271.09	432.142	C22H24O9	[M+H]+	Medicarpin-3-O-Glucoside; Medicocarpin	美迪紫檀素-3-O-葡萄糖苷	Flavonoids	黄酮	Other Flavonoids	其它类黄酮	52766-70-8	2	2.76372e+06	1.6875e+06	7.83962e+06	1.06554e+06	2.31531e+06	1.16202e+06	158205	282329	151598	1.22681e+06	1.30973e+06	1.36545e+06	-	-
mws5041	189.12	86.1	188.116	C8H16N2O3	[M+H]+	L-Glycyl-L-isoleucine	L-甘氨酰-L-异亮氨酸	Amino acids and derivatives	氨基酸及其衍生物	Amino acids and derivatives	氨基酸及其衍生物	19461-38-2	3	237459	186538	246582	631400	508076	504564	354280	321847	413166	445123	476740	428652	-	-
Lmsp003655	521.2	131.05	520.194	C26H32O11	[M+H]+	Dehydrodiconiferyl alcohol-gamma'-O-glucoside	脱氢二松柏醇-γ'-O-葡萄糖苷	Phenolic acids	酚酸类	Phenolic acids	酚酸类	-	1	7.90202e+06	4.17983e+06	2.29215e+06	534254	1.05766e+06	422736	393616	251173	148990	2.4904e+06	2.77022e+06	2.58255e+06	-	-
MWSmce707	133.09	73.06	132.079	C6H12O3	[M+H]+	Ethyl 3-hydroxybutyrate	3-羟基丁酸乙酯	Organic acids	有机酸	Organic acids	有机酸	5405-41-4	3	119444	106826	81286.8	71218.5	127662	99337.1	60667.7	86613.9	112325	115411	125322	113212	-	-
Cmmn012461	299.2	299.2	300.209	C20H28O2	[M-H]-	Dehydroabietic acid	脱氢松香酸	Terpenoids	萜类	Ditepenoids	二萜	1740-19-8	1	8.47234e+06	1.82977e+06	3.92731e+07	4.51112e+07	6.88105e+06	892347	1.10974e+06	1.55758e+07	3.59987e+07	2.75194e+07	2.46622e+07	2.6221e+07	C12078	-
mws0397	301.22	257.23	302.225	C20H30O2	[M-H]-	Cis-5,8,11,14,17-Eicosapentaenoic Acid	二十碳五烯酸(顺-5,8,11,14,17)/EPA(C20:5)	Lipids	脂质	Free fatty acids	游离脂肪酸	10417-94-4	2	159507	29614.9	761191	729331	148850	15519.7	17861.3	234493	685497	526241	496460	553999	C06428	ko01040
Lhmp121005	521.2	131.05	520.194	C26H32O11	[M+H]+	Symplocosin(iso-01)	Symplocosin(iso-01)	Lignans and Coumarins	木脂素和香豆素	Lignans	木脂素	-	3	7.84974e+06	3.16726e+06	2.06637e+06	481414	1.05223e+06	335960	430523	245019	133096	2.2884e+06	2.5554e+06	2.42756e+06	-	-
Wbmn013660	335.22	253.22	336.23	C20H32O4	[M-H]-	3,9-Dihydroxy-13(14)-labden-16,15-olide	3,9-二羟基-13(14)-半日花烯-16,15-内酯	Terpenoids	萜类	Ditepenoids	二萜	-	1	463692	248101	554083	296404	105096	221866	258937	84979	94996.2	212088	192508	193660	-	-
Sadn013265	313.22	245.15	314.225	C21H30O2	[M-H]-	cannabicitran	大麻二吡喃环烷	Terpenoids	萜类	Sesquiterpenoids	倍半萜	19352-64-8	1	11983.8	29145.7	11520.2	6776.82	6450.64	27531	18105	56570.4	6559.21	17472.3	15660.8	16870	-	-
mws0983	326.31	62.06	325.298	C20H39NO2	[M+H]+	N-Oleoylethanolamine	油酰单乙醇胺	Alkaloids	生物碱	Alkaloids	生物碱	111-58-0	1	484641	275998	611042	1.65026e+06	549304	534434	320924	199870	205248	652102	728801	695413	C20792	-
Hmcp003783	211.09	193.07	210.079	C13H10N2O	[M+H]+	1-Acetyl-β-carboline	1-乙酰基-β-咔啉	Alkaloids	生物碱	Plumerane	吲哚类生物碱	-	1	915609	69090.6	567187	552264	191218	129695	30786.4	13460.8	41564.1	315825	352990	336761	-	-
mws0250	182.08	136.08	181.074	C9H11NO3	[M+H]+	L-Tyrosine	L-酪氨酸	Amino acids and derivatives	氨基酸及其衍生物	Amino acids and derivatives	氨基酸及其衍生物	60-18-4	1	2.84631e+06	3.52959e+06	1.37328e+06	2.51679e+06	5.33419e+06	1.9014e+06	7.5417e+06	4.03514e+06	2.47669e+06	5.24323e+06	5.77404e+06	5.79762e+06	C00082	ko00130,ko00261,ko00350,ko00360,ko00400,ko00460,ko00730,ko00940,ko00950,ko00965,ko00966,ko00970,ko00999,ko01100,ko01110,ko01210,ko01230,ko01240
Cmqp002418	521.18	197.08	520.179	C22H32O14	[M+H]+	swertiapunimarin	swertiapunimarin	Others	其它类	Others	其它	151140-40-8	3	2.88778e+06	26732	1.96998e+06	1.05744e+06	2.34273e+06	1.05106e+06	1.26238e+06	1.03718e+06	1.27231e+06	786782	810765	726427	-	-
MWSmce585	104.07	59.01	103.063	C4H9NO2	[M+H]+	Methyl 3-aminopropanoate	3-氨基丙酸甲酯	Amino acids and derivatives	氨基酸及其衍生物	Amino acids and derivatives	氨基酸及其衍生物	4138-35-6	3	3.35781e+06	2.55619e+06	3.24237e+06	2.2499e+06	2.97563e+06	2.19934e+06	2.83699e+06	2.57832e+06	2.89722e+06	3.04768e+06	3.35246e+06	3.37641e+06	-	-
MWS80006	311.22	293.21	312.23	C18H32O4	[M-H]-	9-Hydroperoxy-9Z,11E-Octadecadienoic Acid	9-过氧化羟基-9Z,11E-十八碳二烯酸	Lipids	脂质	Free fatty acids	游离脂肪酸	-	2	102251	292661	124740	261946	384403	262504	75418.4	130963	72479.8	142181	138887	127430	-	-
Lmhp009590	508.34	184.07	507.332	C25H50NO7P	[M+H]+	LysoPC 17:1	溶血磷脂酰胆碱 17:1	Lipids	脂质	LPC	溶血磷脂酰胆碱	-	1	2.22428e+06	476367	742384	1.19901e+06	1.76526e+06	777055	810858	456603	476366	1.04685e+06	1.15532e+06	1.05004e+06	-	-
Zmdn002049	451.13	289.07	452.132	C21H24O11	[M-H]-	Epicatechin-4'-O-β-D-glucopyranoside	表儿茶素-4'-O-β-D-葡萄糖苷	Flavonoids	黄酮	Flavanols	黄烷醇类	-	1	2.33305e+06	2.32582e+06	139150	208456	1.02998e+06	171794	30105.4	22109.9	3368.07	352125	394564	377305	-	-
Wbmn009702	487.34	487.34	488.35	C30H48O5	[M-H]-	2,3,23-Trihydroxyurs-12-en-28-oic acid	2,3,23-三羟基熊果烷-12-烯-28-酸	Terpenoids	萜类	Triterpene	三萜	-	2	2.65908e+06	3.43473e+06	1.93991e+06	4.20527e+07	1.9317e+06	983343	627835	211573	413483	9.25389e+06	9.97999e+06	1.03609e+07	-	-
HJN083	521.2	359.15	522.21	C26H34O11	[M-H]-	Lariciresinol-4'-O-glucoside	落叶松脂素-4'-O-葡萄糖苷	Lignans and Coumarins	木脂素和香豆素	Lignans	木脂素	143663-00-7	1	196597	84769.1	110822	73510	72489	56066.4	24424.3	8747.6	5672.41	81520.3	73814.5	81768.7	-	-
pme3553	187.04	131.05	186.032	C11H6O3	[M+H]+	Psoralen*	补骨脂素*	Lignans and Coumarins	木脂素和香豆素	Coumarins	香豆素	66-97-7	3	80483	175106	181724	91546	108997	27669.2	29381.1	70271	48453.4	54467	59906.3	54178.8	C09305	ko00999,ko01110
MWS2027	129.03	69	128.022	C4H4N2O3	[M+H]+	Barbituric acid;Malonylurea;2,4,6-Pyrimidinetrione	巴比妥酸;丙二酰脲;2,4,6-嘧啶三酮	Nucleotides and derivatives	核苷酸及其衍生物	Nucleotides and derivatives	核苷酸及其衍生物	67-52-7	3	367761	343725	1.88141e+06	185128	323048	411510	3.10901e+06	372583	335009	1.2803e+06	1.16389e+06	1.15575e+06	C00813	ko00240,ko01100
Lskp211400	271.07	211.05	270.064	C14H10N2O4	[M+H]+	siliendines A	siliendines A	Alkaloids	生物碱	Alkaloids	生物碱	-	1	3.32957e+07	699447	1.15448e+07	2.60936e+07	3.19915e+06	2.15423e+06	1.6941e+06	2.04976e+06	1.5953e+06	7.62653e+06	8.1275e+06	7.23965e+06	-	-
Zmhn001358	299.08	137.02	300.084	C13H16O8	[M-H]-	4-O-Glucosyl-4-hydroxybenzoic acid	4-O-葡萄糖基-4-羟基苯甲酸	Phenolic acids	酚酸类	Phenolic acids	酚酸类	-	1	1.6373e+07	10633683	1.56101e+07	8.48529e+06	1.55449e+07	1.08048e+07	4.8021e+06	3.9061e+06	2.95659e+06	5.18417e+06	5.77996e+06	5.69801e+06	-	-
pmn001672	547.17	223.1	548.174	C23H32O15	[M-H]-	Furanofructosyl-α-D-(3-mustard acyl)glucoside	呋喃果糖基-α-D-(3-芥子酰基)葡萄糖苷	Phenolic acids	酚酸类	Phenolic acids	酚酸类	-	2	98908.9	25008.3	33544.4	6530.11	67212.9	18977.1	29435	8560.19	11470.2	39910.8	38425.5	35565.7	-	-
pmb3081	289	96.97	290.004	C6H11PO11	[M-H]-	Glucarate O-Phosphoric acid	磷酸葡萄糖酸	Others	其它类	Saccharides	糖类	-	3	1.83583e+06	3.10265e+06	7.37082e+06	1.89467e+06	3.07516e+06	2.28993e+06	1.5093e+07	3.63166e+06	3.54476e+06	3.08888e+06	2.91496e+06	3.27598e+06	-	-
pme0309	183.03	124.02	184.037	C8H8O5	[M-H]-	3-O-Methylgallic Acid	3-O-甲基没食子酸	Phenolic acids	酚酸类	Phenolic acids	酚酸类	3934-84-7	3	22733.7	13010.6	10960.1	37328.8	33501.8	30327.9	25596.6	20353.7	18923.3	17800.8	19845.6	19590.1	C05616	-
mws0237	187.1	125.1	188.105	C9H16O4	[M-H]-	Azelaic acid	壬二酸	Organic acids	有机酸	Organic acids	有机酸	123-99-9	3	396521	497899	777443	480182	342992	430660	356956	332427	294368	422880	463469	472652	C08261	-
Lcyp000111	254.09	209.08	253.085	C14H11N3O2	[M+H]+	Stellarin A	Stellarin A	Others	其它类	Cyclonic peptide	环肽类化合物	-	3	764212	81972.1	1.25052e+06	996851	86809.5	93367.3	9148.59	34267	15730.6	302731	340476	323066	-	-
pmb2221	318.3	60.04	317.293	C18H39NO3	[M+H]+	4-Hydroxysphinganine	4-羟基鞘氨醇	Lipids	脂质	Sphingolipids	鞘脂	554-62-1	2	1.17484e+06	1.6333e+06	1.03468e+06	1.94328e+06	828058	1.12799e+06	463001	343846	744898	777454	854213	768717	C12144	ko00600,ko01100
pme1816	353.09	191.06	354.095	C16H18O9	[M-H]-	Neochlorogenic acid (5-O-Caffeoylquinic acid)*	新绿原酸 (5-O-咖啡酰奎宁酸)*	Phenolic acids	酚酸类	Phenolic acids	酚酸类	906-33-2	3	428158	58960.6	45884.1	89873.8	62547.4	59609	50995.4	126927	53779.9	76320.7	85166.5	77920	C17147	-
mws0924	145.05	101.06	146.058	C6H10O4	[M-H]-	2-Methylglutaric acid	2-甲基戊二酸	Organic acids	有机酸	Organic acids	有机酸	617-62-9	3	271617	132960	324876	69552.2	64793.4	47200.3	137402	47931.4	237612	174696	196399	189065	-	-
Lmmn000774	343.1	181.05	344.111	C15H20O9	[M-H]-	Dihydrocaffeoylglucose	二氢咖啡酰葡萄糖	Phenolic acids	酚酸类	Phenolic acids	酚酸类	-	3	2.83054e+06	4.09062e+06	2.37257e+06	452833	985480	652129	308162	398512	352866	936345	988491	877983	-	-
mws1715	252.11	136.06	251.102	C10H13N5O3	[M+H]+	Cordycepin (3'-Deoxyadenosine)*	虫草素(3'-脱氧腺苷)*	Nucleotides and derivatives	核苷酸及其衍生物	Nucleotides and derivatives	核苷酸及其衍生物	73-03-0	3	1.72764e+06	542055	942001	901938	546100	369257	341739	389032	160648	705737	764065	794370	C08431	-
Cmmn012850	301.22	205.12	302.225	C20H30O2	[M-H]-	Communic Acid	湿地松酸	Terpenoids	萜类	Ditepenoids	二萜	2761-77-5	1	16625.2	4459.06	95439.7	140896	13288	1255.98	2290.23	27215.5	119610	86514	77326.4	79249.4	-	-
Zmyn005384	299.26	253.26	300.266	C18H36O3	[M-H]-	2R-Hydroxyoctadecanoic Acid*	2R-羟基十八烷酸*	Lipids	脂质	Free fatty acids	游离脂肪酸	26633-48-7	3	72647.1	81490.6	154734	110531	124446	85970.7	87009.2	69906.7	48815.5	72884.1	69098.4	64640.9	C03042	-
Qayp008161	701.37	539.32	700.367	C35H56O14	[M+H]+	Sileneoside H	Sileneoside H	Steroids	甾体	Steroidal saponins	甾体皂苷	-	1	35640.9	22601	12592.8	46419	31664.8	26386.2	35275.2	21116.3	45368.8	30618.6	28576.4	32231.1	-	-
mws1587	132.1	86.1	131.095	C6H13NO2	[M+H]+	L-Norleucine*	L-正亮氨酸*	Amino acids and derivatives	氨基酸及其衍生物	Amino acids and derivatives	氨基酸及其衍生物	327-57-1	1	8.35866e+06	7.38545e+06	2.86237e+06	4.41868e+06	2.43577e+07	3.77157e+06	3.57115e+07	3.49657e+06	4.55436e+06	1.41022e+07	1.57893e+07	1.44422e+07	C01933	-
Lmsn010075	531.33	441.3	532.34	C31H48O7	[M-H]-	19-Hydroxy-2,3-secours-12-ene-2,3,28-trioic acid 3-methyl ester (Cecropiacic acid 3-methyl ester)	19-羟基-2,3-开环熊果-12-烯-2,3,28-三酸-3-甲酯	Terpenoids	萜类	Triterpene	三萜	-	2	88275.6	101902	60251.6	161902	148615	41628.2	58222.5	6407.82	2770.16	33998.8	33424.5	37333.5	-	-
Lmln001195	297.1	135.07	298.105	C14H18O7	[M-H]-	Picein (4-Acetylphenyl-glucoside)	云杉苷	Phenolic acids	酚酸类	Phenolic acids	酚酸类	530-14-3	3	88524.6	31600.3	65964.6	8813.58	19579.2	15857.4	8193.59	4257.6	11378	26660.1	25352.4	28592.6	C10720	-
Hmqp006023	326.27	309.27	324.266	C20H36O3	[M+H]+	Ethyl 9-Hydroxy-10,12-octadecadienoic acid	9-羟基-10,12-十八碳二烯酸乙酯	Lipids	脂质	Free fatty acids	游离脂肪酸	-	3	56786	34175.7	68668.5	184340	65262.6	64273.7	41377.8	27102.6	28577.2	72304	81002.6	79826.7	-	-
pme3472	271.08	108.02	272.09	C12H16O7	[M-H]-	Arbutin	熊果苷	Phenolic acids	酚酸类	Phenolic acids	酚酸类	497-76-7	3	236768	130211	102873	31196.7	55136.6	26099.4	8429.83	8690.38	6514.59	86039	92666.7	97155.3	C06186	ko00010
Lmtn003096	523.22	361.14	524.226	C26H36O11	[M-H]-	Secoisolariciresinol 4-O-glucoside	开环异落叶松脂酚-4-O-葡萄糖苷	Lignans and Coumarins	木脂素和香豆素	Lignans	木脂素	-	2	9.31647e+06	2.984e+06	5.65386e+06	957223	2.72657e+06	894338	427464	392055	285407	1.86597e+06	1.82799e+06	2046358	-	-
pmb2673	210.04	135.04	211.048	C9H9NO5	[M-H]-	6-Hydroxydopaquinone	6-羟基多巴醌	Amino acids and derivatives	氨基酸及其衍生物	Amino acids and derivatives	氨基酸及其衍生物	135791-48-9	3	10995.4	5637.59	10174.6	8058.43	12592.8	8361.62	13419.1	4538.81	6812.35	10088.3	9188.66	9015.75	-	-
Lssp210056	465.1	303.05	464.096	C21H20O12	[M+H]+	Quercetin3-O-galactoside	槲皮素-3-O-半乳糖苷	Flavonoids	黄酮	Other Flavonoids	其它类黄酮	-	1	636965	705530	252567	5.14736e+06	5.41062e+06	6.45056e+06	864623	1.5496e+06	877239	1.09938e+06	1.0746e+06	977932	-	-
pmn001506	617.41	455.35	618.413	C36H58O8	[M-H]-	Oleanolic acid-3-O-glucoside	齐墩果酸-3-O-葡萄糖苷	Terpenoids	萜类	Triterpene Saponin	三萜皂苷	3391-80-8	3	3153.21	11093	2775.64	2438.46	2441.19	3404.47	5593.94	4616.45	6420.44	6452.39	7265.19	6671.01	-	-
pma2987	142.1	124.09	141.09	C6H11N3O	[M+H]+	Histidinol	组氨醇	Alkaloids	生物碱	Alkaloids	生物碱	501-28-0	3	1.35257e+07	1.4251e+07	1.54081e+07	1.75142e+07	1.51715e+07	1.73743e+07	2.54325e+07	1.80361e+07	1.84749e+07	2.13618e+07	2.07285e+07	2.33298e+07	C00860	ko00340,ko01100,ko01110,ko01230
HJN098	779.46	779.46	780.466	C42H68O13	[M-H]-	Azukisaponin I	赤豆皂苷 I	Terpenoids	萜类	Triterpene Saponin	三萜皂苷	82793-02-0	1	303798	157507	187261	226403	196494	100017	70701.7	84167.6	117284	209336	236812	220368	-	-
Zmbp002538	205.1	146.06	204.09	C11H12N2O2	[M+H]+	1-Methoxy-indole-3-acetamide	1-甲氧基-吲哚-3-乙酰胺	Alkaloids	生物碱	Plumerane	吲哚类生物碱	-	1	5.46614e+07	6.24698e+07	8.56024e+06	3.07456e+07	6.8662e+07	3.68501e+07	5.95739e+07	1.51101e+07	1.52237e+07	4.1416e+07	4.60392e+07	4.13089e+07	-	-
pme0008	176.1	113.07	175.096	C6H13N3O3	[M+H]+	L-Citrulline	L-瓜氨酸	Amino acids and derivatives	氨基酸及其衍生物	Amino acids and derivatives	氨基酸及其衍生物	372-75-8	3	943027	117575	390897	159318	3.09362e+06	518757	2.14533e+07	749852	147902	2.19626e+06	2.34668e+06	2.06939e+06	C00327	ko00220,ko01100,ko01110,ko01230
Lmhp008273	438.26	297.24	437.254	C20H40NO7P	[M+H]+	LysoPE 15:1(2n isomer)*	溶血磷脂酰乙醇胺 15:1(2n异构)*	Lipids	脂质	LPE	溶血磷脂酰乙醇胺	-	2	73043.6	9874.02	34665.1	77284.5	37599.2	18429.7	27968.4	10734	12420.1	34164.3	38398.1	34857.9	-	-
pmp001079	595.17	287.06	594.159	C27H30O15	[M+H]+	Luteolin-7-O-neohesperidoside (Lonicerin)	木犀草素-7-O-新橘皮糖苷 (忍冬苷)	Flavonoids	黄酮	Flavones	黄酮	25694-72-8	3	28215.4	32518	26817.7	15464.4	48004.3	43832.3	15250.3	23209.8	23682.1	28003.5	26765.9	30312.4	C12630	ko00944
mws1195	179.07	147.04	178.063	C10H10O3	[M+H]+	p-Coumaric acid methyl ester	对香豆酸甲酯	Phenolic acids	酚酸类	Phenolic acids	酚酸类	3943-97-3	3	22990.1	11194.8	34222.8	29463.3	25551	13685.6	15401.9	21441.6	15593.3	39811.9	41199.4	36374.5	-	-
MWSmce295	245.07	113.03	244.07	C9H12N2O6	[M+H]+	1-beta-D-Arabinofuranosyluracil	1-β-D-阿糖呋喃脲嘧啶	Nucleotides and derivatives	核苷酸及其衍生物	Nucleotides and derivatives	核苷酸及其衍生物	3083-77-0	2	365219	355098	491289	1.06248e+06	861981	1.06007e+06	429575	897206	903780	510023	567987	509065	C16908	-
Lmlp003531	449.11	287.06	448.101	C21H20O11	[M+H]+	Luteolin-3'-O-glucoside*	木犀草素-3'-O-葡萄糖苷*	Flavonoids	黄酮	Flavones	黄酮	-	3	1.84991e+06	686373	1.36031e+06	570792	579713	282323	48420.8	109807	53546.1	802135	906340	829717	-	-
Zmgn002106	206.08	58.03	207.089	C11H13NO3	[M-H]-	N-Acetyl-L-phenylalanine	N-乙酰-L-苯丙氨酸	Amino acids and derivatives	氨基酸及其衍生物	Amino acids and derivatives	氨基酸及其衍生物	2018-61-3	1	497112	430966	426178	346446	452571	322374	361551	224691	262143	327699	346958	372216	C03519	ko00360,ko01100
MWSslk203	727.21	433.11	726.201	C32H38O19	[M+H]+	Vaccarin	王不留行黄酮苷	Flavonoids	黄酮	Flavones	黄酮	53452-16-7	1	131639	3272.58	7708.31	1.16624e+06	3.62076e+06	306326	30022.2	151464	12095.8	458219	509316	455353	-	-
Lmmp002795	463.12	301.07	462.116	C22H22O11	[M+H]+	Pratensein-7-O-glucoside	红车轴草素-7-O-葡萄糖苷	Flavonoids	黄酮	Isoflavones	异黄酮	36191-03-4	3	101190	80476.4	247146	37727	58657.4	58691.5	10695.7	18605.7	9920.54	102504	90166.6	96008.7	-	-
Lssp210087	359.15	137.06	358.142	C20H22O6	[M+H]+	Matairesinol	罗汉松树脂醇	Lignans and Coumarins	木脂素和香豆素	Lignans	木脂素	580-72-3	2	832024	504343	360077	467986	431978	268135	280671	479095	467796	671878	749914	755854	C10682	ko00999,ko01100,ko01110
Lmhp008924	532.34	184.07	531.332	C27H50NO7P	[M+H]+	LysoPC 19:3	溶血磷脂酰胆碱 19:3	Lipids	脂质	LPC	溶血磷脂酰胆碱	-	3	111994	3613.34	18809.4	45321.9	23054.1	25486.5	15204.6	11384.9	2545.33	16173.4	17001.2	14929.9	-	-
Qaxn005266	579.21	417.15	580.216	C28H36O13	[M-H]-	Acanthoside B	无梗五加苷 B	Lignans and Coumarins	木脂素和香豆素	Lignans	木脂素	-	1	340504	350338	801920	247590	1.1505e+06	360000	90630.6	128492	222030	315363	345550	305007	-	-
Lmxn015337	269.25	251.24	270.256	C17H34O2	[M-H]-	Methyl palmitate	棕榈酸甲酯	Lipids	脂质	Free fatty acids	游离脂肪酸	112-39-0	3	40570.1	59521.4	64417.5	120454	97863.4	86185.1	50481.5	84529	65879.7	96122.8	95643.6	107180	C16995	-
pmp000275	581.17	139.04	580.158	C30H28O12	[M+H]+	Gambiriin A1	棕儿茶素 A1	Tannins	鞣质	Tannin	鞣质	76250-49-2	1	309989	1.1135e+06	178970	1.50889e+06	726860	800567	751347	842873	1.27785e+06	333177	379726	353528	C17772	-
Lmtn002796	449.11	287.06	450.116	C21H22O11	[M-H]-	Aromadendrin-7-O-glucoside	香橙素-7-O-葡萄糖苷	Flavonoids	黄酮	Flavanonols	二氢黄酮醇	28189-90-4	3	144129	79998	41009.1	60754.7	46984.6	56721.4	40123.3	16080.4	38295.6	37079	41802.6	37656.4	-	-
pmb1754	184.07	125	184.073	C5H15NO4P+	[M]+	O-Phosphocholine	O-磷酸胆碱	Alkaloids	生物碱	Alkaloids	生物碱	107-73-3	3	220158	584065	1.1427e+06	1.3415e+06	1.22037e+06	838038	1.01552e+06	680755	1.2478e+06	985475	917014	1.04755e+06	C00588	ko00564,ko01100
zjbp110819	311.13	251.11	310.12	C19H18O4	[M+H]+	6,7-dimethoxy-2-[2-phenylethyl]chromone	6,7-二甲氧基-2-[2-苯乙基]色酮	Others	其它类	Others	其它	-	1	325180	230305	207483	119528	146468	88947.2	62668.7	103436	81434.4	220305	247869	222621	-	-
Hmqn005002	331.23	299.2	332.235	C21H32O3	[M-H]-	12-Hydroxymethylabietate	12-羟基松香酸甲酯	Terpenoids	萜类	Ditepenoids	二萜	-	1	126580	33059.9	469846	537494	82029.9	12000	8164.58	105309	388088	219038	245957	246989	-	-
Hayp001837	241.1	223.09	240.09	C14H12N2O2	[M+H]+	arenarine A	arenarine A	Alkaloids	生物碱	Alkaloids	生物碱	-	1	1.89173e+06	194963	2.38643e+06	1.45173e+07	281182	154582	67223.4	98616.5	105447	2.87532e+06	3.2694e+06	2.98287e+06	-	-
pmb2591	245.09	203.08	246.1	C13H14N2O3	[M-H]-	N-Acetyl-L-Tryptophan	N-乙酰-L-色氨酸	Amino acids and derivatives	氨基酸及其衍生物	Amino acids and derivatives	氨基酸及其衍生物	1218-34-4	2	253706	159147	185076	96564.6	371845	126653	741678	44792.4	44409.9	235406	235021	263662	-	-
pme1184	268.1	152.06	267.097	C10H13N5O4	[M+H]+	2'-Deoxyguanosine	2'-脱氧鸟苷	Nucleotides and derivatives	核苷酸及其衍生物	Nucleotides and derivatives	核苷酸及其衍生物	961-07-9	3	1.49743e+06	477239	1.22427e+06	915467	404062	242712	313162	388485	122984	474605	535224	533944	C00330	ko00230,ko01100,ko01232,ko02010
Rfmb091	295.23	195.14	296.235	C18H32O3	[M-H]-	9S-Hydroxy-10E,12Z-octadecadienoic acid*	9S-羟基-10E,12Z-十八碳二烯酸*	Lipids	脂质	Free fatty acids	游离脂肪酸	15514-85-9	1	138876	169983	179331	649394	760157	949279	150931	199937	152334	412412	426625	373901	C14767	ko00591
Lskp211406	326.11	209.07	325.106	C17H15N3O4	[M+H]+	siliendines D	siliendines D	Alkaloids	生物碱	Alkaloids	生物碱	-	3	90357.2	909.682	14625.5	28748.9	2298.56	1717.48	9	9	9	13920.3	12714.1	14537.2	-	-
pmb3042	491.12	329.1	492.127	C23H24O12	[M-H]-	Tricin-5-O-Glucoside	苜蓿素-5-O-葡萄糖苷	Flavonoids	黄酮	Flavones	黄酮	32769-00-9	3	1.50409e+06	998360	512590	74355.4	359536	156513	94281.8	65194	33033.6	745358	848874	774442	-	-
MWS1983	343.12	89.03	344.132	C12H24O11	[M-H]-	Maltitol	麦芽糖醇	Others	其它类	Saccharides	糖类	585-88-6	3	105622	41829.2	52306	95403.5	37756.9	21636.3	28895.1	36748.7	24681.8	32666.5	28526.6	30649.7	-	-
mws2209	449.11	287.06	448.101	C21H20O11	[M+H]+	Kaempferol-3-O-glucoside (Astragalin)*	山柰酚-3-O-葡萄糖苷(紫云英苷)*	Flavonoids	黄酮	Flavonols	黄酮醇	480-10-4	3	1.87075e+06	773562	1.58046e+06	511617	614444	262093	48957.2	103566	48515	863378	875822	975069	C12249	ko00944,ko01110
pmn001671	547.17	223.1	548.174	C23H32O15	[M-H]-	Furanofructosyl-α-D-(6-mustard acyl)glucoside	呋喃果糖基-α-D-(6-芥子酰基)葡萄糖苷	Phenolic acids	酚酸类	Phenolic acids	酚酸类	-	2	125236	44558.6	50379.5	12468.7	68914.5	23370.3	45020.9	13668.3	15065.8	57410.6	59397.4	65312	-	-
pmb0618	627.19	465.1	626.185	C28H34O16	[M+H]+	Hesperetin-8-C-glucoside-3'-O-glucoside	橙皮素-8-C-葡萄糖苷-3'-O-葡萄糖苷	Flavonoids	黄酮	Flavonols	黄酮醇	-	3	412410	291479	598376	68070.9	207042	77730.7	21826.6	59747.7	29087.9	230661	263564	253683	-	-
ML10181668	130.09	84.08	129.079	C6H11NO2	[M+H]+	Cycloleucine	环亮氨酸	Amino acids and derivatives	氨基酸及其衍生物	Amino acids and derivatives	氨基酸及其衍生物	52-52-8	3	3.81567e+06	2.58222e+06	4.78831e+06	4.65767e+06	1.80509e+07	5.58566e+06	2.08691e+07	6.07351e+06	4.45327e+06	5.75439e+06	6.01032e+06	6.56695e+06	C03969	-
Lhmp091618	971.48	469.33	970.477	C48H74O20	[M+H]+	Soyasaponin H glucuronic acid glucose rhamnoside(iso-02)	大豆皂苷元H葡萄糖醛酸葡萄糖鼠李糖苷(iso-02)	Terpenoids	萜类	Triterpene Saponin	三萜皂苷	-	2	99930.1	84070.7	60645.6	41089.9	76648.4	59598.9	31406.9	41016.4	28339.2	67689.5	77095.9	70180.8	-	-
Zmsp001834	169.05	65	168.042	C8H8O4	[M+H]+	2,6-Dimethoxy-1,4-benzoquinone*	2,6-二甲氧基-1,4-苯醌*	Quinones	醌类	Quinones	醌类	530-55-2	1	3.71299e+06	2.11063e+06	7.92113e+06	820309	1.69643e+06	581616	374033	487154	615236	1.79262e+06	2.04457e+06	1.86767e+06	C10331	-
Lmhp010908	536.37	184.07	535.364	C27H54NO7P	[M+H]+	LysoPC 19:1	溶血磷脂酰胆碱 19:1	Lipids	脂质	LPC	溶血磷脂酰胆碱	-	1	2.2762e+06	439407	974287	1.58169e+06	1.35125e+06	770748	558193	435264	395693	679492	759722	674088	-	-
MWS20158	683.25	341.14	682.247	C32H42O16	[M+H]+	Pinoresinol-4,4'-O-β-D-bisglucopyranoside	松脂醇-4,4'-二-O-β-D-吡喃葡萄糖苷	Lignans and Coumarins	木脂素和香豆素	Lignans	木脂素	-	2	110041	135383	97149.8	85714.4	62750.1	67290.1	98402.5	102519	81990.3	71740.9	62566.9	67637.6	-	-
mws1333	341.11	113.02	342.116	C12H22O11	[M-H]-	Melibiose	蜜二糖	Others	其它类	Saccharides	糖类	585-99-9	1	978293	1.66238e+06	554535	358215	760786	542958	900279	992540	583628	1.1266e+06	1.13116e+06	1.00049e+06	C05402	ko00052,ko01100,ko02010
pmp000583	477.1	301.07	476.096	C22H20O12	[M+H]+	Diosmetin-7-O-glucuronide	香叶木素-7-O-葡萄糖醛酸苷	Flavonoids	黄酮	Flavones	黄酮	35110-20-4	3	22475.6	56331.3	51536	138807	94852.8	94233.9	82404.3	145574	107243	82280.7	79925.6	72055.2	-	-
Zbqn008164	469.33	469.33	470.34	C30H46O4	[M-H]-	Rubiarbonone E	茜草乔木酮 E	Terpenoids	萜类	Triterpene	三萜	-	2	512262	108879	150092	497765	208396	43307.9	37722.5	23580.5	18092.2	112688	100577	114283	-	-
pmb0856	480.31	339.29	479.301	C23H46NO7P	[M+H]+	LysoPE 18:1(2n isomer)*	溶血磷脂酰乙醇胺 18:1(2n异构)*	Lipids	脂质	LPE	溶血磷脂酰乙醇胺	-	3	1.45573e+07	4.5417e+06	6.27753e+06	6.9984e+06	9.00329e+06	6.60185e+06	1.0351e+07	7.33295e+06	7.55533e+06	9.93369e+06	1.08408e+07	9.47843e+06	-	-
pmp000237	579.13	283.06	578.127	C26H26O15	[M+H]+	Apigenin-6-C-(2''-glucuronyl)xyloside	芹菜素-6-C-(2''-葡萄糖醛酸基)木糖苷	Flavonoids	黄酮	Flavones	黄酮	-	3	80142.8	358085	12151.2	250999	309519	166526	115759	83252.7	70013.6	119824	137490	127862	-	-
mws0359	241.22	241.22	242.225	C15H30O2	[M-H]-	Pentadecanoic Acid	十五烷酸	Lipids	脂质	Free fatty acids	游离脂肪酸	1002-84-2	3	620019	718393	900515	965306	594152	540293	576478	461203	471739	619462	704878	693638	C16537	-
pmf0174	157.16	157.16	158.167	C10H22O	[M-H]-	1-Decanol*	1-癸醇*	Others	其它类	Saccharides	糖类	112-30-1	3	5.16838e+06	4.54217e+06	5.16277e+06	4.3776e+06	4.5901e+06	3774789	4.39959e+06	3.98953e+06	4.38915e+06	3.88013e+06	4.31386e+06	4.43148e+06	C01633	-
Xmgp006913	341.14	137.06	340.131	C20H20O5	[M+H]+	2,4,2',4'-tetrahydroxy-3'-prenylchalcone	2,4,2',4'-四羟基-3'-异戊烯基查耳酮	Flavonoids	黄酮	Chalcones	查耳酮	-	3	2.33028e+06	1.96251e+06	1.65522e+06	806851	935154	518641	498666	685478	574103	1.52318e+06	1.74184e+06	1.69e+06	-	-
Lmhn002850	445.14	113.02	446.142	C19H26O12	[M-H]-	Canthoside A	Canthoside A	Phenolic acids	酚酸类	Phenolic acids	酚酸类	-	3	1.66085e+06	808026	2.42991e+06	1.8762e+06	2.2377e+06	521454	1.40893e+06	1.96469e+06	373059	672946	706197	770682	-	-
HJN074	591.15	289.07	592.158	C31H28O12	[M-H]-	Procyanidin A6	原花青素 A6	Tannins	鞣质	Proanthocyanidins	原花青素	-	2	134964	284584	20642.2	332116	233152	221072	162752	127777	108210	129292	121539	139583	-	-
pme0274	132.1	69.07	131.095	C6H13NO2	[M+H]+	6-Aminocaproic acid	6-氨基己酸	Organic acids	有机酸	Organic acids	有机酸	60-32-2	3	7.04908e+06	6.61873e+06	2.32012e+06	3.72881e+06	2.53654e+07	3.48549e+06	3.08309e+07	3.2038e+06	3.21034e+06	1.06898e+07	1.20935e+07	1.20993e+07	C02378	ko01100
MWS04559g	182.08	136.08	181.074	C9H11NO3	[M+H]+	3-Hydroxy-L-phenylalanine	3-羟基-L-苯丙氨酸	Amino acids and derivatives	氨基酸及其衍生物	Amino acids and derivatives	氨基酸及其衍生物	587-33-7	1	3.11239e+06	3.51534e+06	1.49993e+06	2.77266e+06	6.00289e+06	2.48882e+06	9.74057e+06	4.99003e+06	2.57366e+06	6.53062e+06	7.25858e+06	7.48081e+06	-	-
MWS201447	237.12	120.09	236.116	C12H16N2O3	[M+H]+	Phe-Ala	L-苯丙氨酸-L-丙氨酸	Amino acids and derivatives	氨基酸及其衍生物	Amino acids and derivatives	氨基酸及其衍生物	3918-87-4	2	41946.2	14889.9	23593.5	84074.3	68107.9	73563.6	51871.3	56186.7	62281.4	88819.4	85476.9	77331	-	-
Lmbn004685	311.22	223.17	312.23	C18H32O4	[M-H]-	5S,8R-DiHODE; (5S,8R,9Z,12Z)-5,8-Dihydroxyoctadeca-9,12-dienoate	5,8-二羟基-9,12-十八碳二烯酸	Lipids	脂质	Free fatty acids	游离脂肪酸	-	2	18024.4	8713.05	19617.7	19135.8	14660.8	15935.6	17837	17862.4	18438.2	15757.7	15499	17605.5	C20186	ko00591
Qatp010618	343.15	105.03	342.147	C20H22O5	[M+H]+	Lignans Machilin F	Lignans Machilin F	Lignans and Coumarins	木脂素和香豆素	Lignans	木脂素	-	3	41228.7	56470.4	14766.2	43535.1	39887.8	38377.8	13483.7	32055.4	38819.6	43851.2	47554.1	41341.9	-	-
Zbsp003145	291.09	123.04	290.079	C15H14O6	[M+H]+	Leucopelargonidin; 3,4,5,7,4'-Pentahydroxyflavan	白天竺葵苷元; 3,4,5,7,4'-五羟基黄烷	Others	其它类	Others	其它	520-17-2	1	186647	348258	86383.8	1.05408e+06	519767	312833	370025	260008	137830	201390	221201	192954	-	-
MWSmce689	293.25	95.09	292.24	C19H32O2	[M+H]+	Methyl linolenate	亚麻酸甲酯	Lipids	脂质	Free fatty acids	游离脂肪酸	301-00-8	3	252643	41175.5	113101	162767	106739	42132.8	39017.1	35616.3	16437.9	121954	138466	123773	-	-
mws0027	197.05	123.01	198.053	C9H10O5	[M-H]-	Syringic acid	丁香酸	Phenolic acids	酚酸类	Phenolic acids	酚酸类	530-57-4	3	30835.9	36136.8	24018.7	25573.7	19131.6	31367.6	29034.4	16305.9	36609.4	30175.1	34770.5	32618	C10833	-
Hmlp002821	495.08	319.04	494.07	C21H18O14	[M+H]+	Myricetin-3-O-glucuronide	杨梅素-3-O-葡萄糖醛酸苷	Flavonoids	黄酮	Flavonols	黄酮醇	77363-65-6	3	48367.6	36180.2	44553.2	54709.2	34494.4	39858.8	19220.2	11655.3	28213.9	51517.7	44741.1	48998.2	-	-
MWS5083	455.1	96.97	456.105	C17H21N4O9P	[M-H]-	Flavin Single Nucleotide(FMN)	黄素单核苷酸(FMN)	Nucleotides and derivatives	核苷酸及其衍生物	Nucleotides and derivatives	核苷酸及其衍生物	6184-17-4	3	54013	63484.8	75681.3	73630.1	74003.1	78387.9	71086.8	57143.9	67696.6	94978.8	108090	107163	C00061	ko00190,ko00740,ko01100,ko01110,ko01240
pmn001553	315.11	153.06	316.116	C14H20O8	[M-H]-	Cimidahurinine	北升麻宁	Phenolic acids	酚酸类	Phenolic acids	酚酸类	142542-89-0	2	437404	425307	240137	81443.6	222904	65365.3	38962.1	33168.1	24037.4	120391	137682	124296	-	-
Zmjp003291	595.17	433.12	594.159	C27H30O15	[M+H]+	Vitexin-2''-O-galactoside	牡荆素-2''-O-半乳糖苷	Flavonoids	黄酮	Flavones	黄酮	-	2	1.00868e+06	187976	2.58521e+06	246168	267384	284676	200840	223666	364103	703359	809577	743487	-	-
Lmdn006811	455.35	455.35	456.36	C30H48O3	[M-H]-	3,24-Dihydroxyolean-12-en-22-one (Soyasapogenol E)*	3,24-二羟基齐墩果-12-烯-22-酮 (大豆皂醇 E)*	Terpenoids	萜类	Triterpene	三萜	6750-59-0	1	656785	428962	293737	970662	518135	275667	358440	143769	418520	361122	329714	380755	C17420	-
HJKP000649	136.07	91.05	135.068	C8H9NO	[M+H]+	N-benzylformamide	正苄基甲酰胺	Alkaloids	生物碱	Alkaloids	生物碱	6343-54-0	2	91636.5	116630	41098.3	97248.3	184484	63693.9	263070	149852	59832.6	206420	198517	227967	C15561	-
pme0122	189.12	126.09	188.116	C8H16N2O3	[M+H]+	N6-Acetyl-L-lysine	N6-乙酰-L-赖氨酸	Amino acids and derivatives	氨基酸及其衍生物	Amino acids and derivatives	氨基酸及其衍生物	692-04-6	3	1.24744e+06	2.75625e+06	353039	600506	1.45092e+06	776736	1.25481e+06	1.16619e+06	424490	922656	916182	1.03982e+06	C02727	ko00310,ko01100
Lszp210002	489.36	453.34	488.35	C30H48O5	[M+H]+	3,19,23-Trihydroxyurs-12-en-28-oic acid (Barbinervic acid)	3,19,23-三羟基熊果-12-烯-28-酸 (马尾柴酸)	Terpenoids	萜类	Triterpene	三萜	-	2	1.0299e+06	189022	341701	2.32857e+06	407378	217355	137252	69603.5	31389.5	495268	572715	539874	-	-
MWSmce389	209.12	179.07	208.11	C12H16O3	[M+H]+	Beta-asarone	β-细辛脑	Phenolic acids	酚酸类	Phenolic acids	酚酸类	5273-86-9	2	18857.4	19832.9	18068.2	11652.1	18398.4	15310.5	13247.2	15145.2	9141.86	15775.7	17822.8	18062.1	C10430	-
pmb0874	478.29	337.27	477.286	C23H44NO7P	[M+H]+	LysoPE 18:2(2n isomer)*	溶血磷脂酰乙醇胺 18:2(2n异构)*	Lipids	脂质	LPE	溶血磷脂酰乙醇胺	-	2	3.89442e+07	1.62667e+07	1.68399e+07	2.12604e+07	2.87163e+07	2.27215e+07	2.4949e+07	2.60461e+07	2.73953e+07	3.75866e+07	4.08817e+07	3.53682e+07	-	-
Zmyn000155	173.11	131.08	174.1	C7H14N2O3	[M-H]-	N-α-Acetyl-L-ornithine	N-α-乙酰基-L-鸟氨酸	Amino acids and derivatives	氨基酸及其衍生物	Amino acids and derivatives	氨基酸及其衍生物	6205-08-9	3	1.02078e+06	24409.3	292640	75434.7	1.83759e+06	398162	2.13457e+06	530769	37887.7	2.20024e+06	2.00741e+06	2.32388e+06	C00437	ko00220,ko01100,ko01110,ko01210,ko01230
Jmmn002533	475.18	179.07	476.189	C21H32O12	[M-H]-	coleoside-B	coleoside-B	Terpenoids	萜类	Monoterpenoids	倍萜	-	3	7.80141e+06	22756.1	4.23155e+06	752317	2.65481e+06	1.17439e+06	537783	367694	449691	3.12701e+06	2.95854e+06	3.41728e+06	-	-
mws2608	222.1	84.05	221.09	C8H15NO6	[M+H]+	N-Acetyl-D-galactosamine	N-乙酰-D-半乳糖胺	Others	其它类	Saccharides	糖类	1811-31-0	3	123513	249770	239170	293825	251692	166810	285981	218590	119029	179310	200683	175515	C01132	ko00052,ko00520,ko01100,ko01250
pmf0314	289.25	157.16	290.261	C20H34O	[M-H]-	cis-Abienol	顺式泛醇	Terpenoids	萜类	Ditepenoids	二萜	17990-16-8	3	39927.5	86584.1	52085.8	37445.6	59193.5	55668.1	49065.9	75327	54404.9	61073	59446.9	68130.4	-	-
Hamp011640	256.26	102.09	255.256	C16H33NO	[M+H]+	palmitic amide	十六碳酰胺	Others	其它类	Others	其它	-	2	2.19816e+07	1.47214e+07	2.06079e+07	2.02687e+07	2.21445e+07	1.58741e+07	2.15688e+07	2.1019e+07	1.83801e+07	2.30954e+07	2.05947e+07	2.0201e+07	-	-
pmp000786	345.1	330.07	344.09	C18H16O7	[M+H]+	Eupatorin; 3',5-Dihydroxy-4',6,7-Trimethoxyflavone*	泽兰黄素; 3',5-二羟基-4',6,7-三甲氧基黄酮*	Flavonoids	黄酮	Flavones	黄酮	855-96-9	1	4895	5838.36	5489.49	4811.14	9446.55	5880.67	2659.13	942407	6344.83	620311	683907	592973	-	-
MWS0811	130.09	84.08	129.079	C6H11NO2	[M+H]+	L-Pipecolic Acid	L-哌啶酸	Organic acids	有机酸	Organic acids	有机酸	3105-95-1	3	350478	316378	537092	676135	2.56296e+06	774014	5.23049e+06	627979	591283	1.07619e+06	1.24732e+06	1.18113e+06	C00408	ko00310,ko00960,ko01100,ko01110
mws4134	611.14	306.08	612.152	C20H32N6O12S2	[M-H]-	Oxiglutatione	氧化谷胱甘肽	Amino acids and derivatives	氨基酸及其衍生物	Amino acids and derivatives	氨基酸及其衍生物	27025-41-8	3	29703.7	13908.4	4790.51	5752.43	15950.4	3363.32	15974.2	6426.77	6820.59	51299.1	57969.8	50917.7	C00127	ko00480,ko01100,ko01240
Cmcp006262	505.35	423.33	504.345	C30H48O6	[M+H]+	2,3,7,19-Tetrahydroxyurs-12-en-28-oic acid (Roxburic Acid)	2,3,7,19-四羟基熊果-12-烯-28-酸 (刺梨酸)	Terpenoids	萜类	Triterpene	三萜	108657-25-6	2	166164	14801	71840.8	338970	6116.86	5801.36	1494.43	3958.79	1886.71	52037.5	55332	47658.4	-	-
pmb0863	492.31	184.07	491.301	C24H46NO7P	[M+H]+	LysoPC 16:2(2n isomer)*	溶血磷脂酰胆碱 16:2(2n异构)*	Lipids	脂质	LPC	溶血磷脂酰胆碱	-	2	39392.5	21285	33419.6	79301.2	221292	115956	130181	75205.6	108625	63819.8	58734.1	54998.2	-	-
Zamn00402	179.06	59.01	180.063	C6H12O6	[M-H]-	sorbose	山梨糖	Others	其它类	Saccharides	糖类	-	3	1.04747e+06	1.75107e+06	1.05617e+06	911859	930908	710345	459910	835430	573959	946817	1.08383e+06	1.07839e+06	-	-
mws0183	153.02	109.03	154.027	C7H6O4	[M-H]-	3,4-Dihydroxybenzoic acid (Protocatechuic acid)*	3,4-二羟基苯甲酸; 原儿茶酸*	Phenolic acids	酚酸类	Phenolic acids	酚酸类	99-50-3	3	341786	342737	312762	544496	541095	336913	324408	305373	327703	228137	250675	265007	C00230	ko01100,ko01110
Zmjp004610	537.16	375.11	536.153	C25H28O13	[M+H]+	5,4'-Dihydroxy-3,6,7,3'-tetramethoxyflavone-4'-O-glucoside	5,4'-二羟基-3,6,7,3'-四甲氧基黄酮-4'-O-葡萄糖苷	Flavonoids	黄酮	Flavones	黄酮	23279-19-8	2	7.8075e+06	182032	80774.6	15473.1	390240	35133	9288.63	28179.3	369484	4.90025e+06	5.48315e+06	4.77167e+06	-	-
pmb0764	144.05	113.03	143.041	C6H9NOS	[M+H]+	4-Methyl-5-thiazoleethanol	4-甲基-5-噻唑乙醇	Others	其它类	Others	其它	137-00-8	3	165369	103714	220044	164640	149526	58980.1	89091.3	112030	99872.2	132765	151022	133092	C04294	ko00730,ko01100,ko01240
pme3186	168.99	78.96	169.998	C3H7O6P	[M-H]-	DL-Glyceraldehyde-3-phosphate	DL-甘油醛-3-磷酸	Organic acids	有机酸	Organic acids	有机酸	591-59-3	3	121908	388548	418422	467498	167732	259215	186448	266258	346493	328789	286362	293191	C00661	-
Zbzp003763	177.05	134.04	176.047	C10H8O3	[M+H]+	11-methoxy viburtinal	11-methoxy viburtinal	Terpenoids	萜类	Monoterpenoids	倍萜	-	3	317011	162006	94287.2	30020.1	82515.9	46686.9	28469.3	13002.9	56285.4	114981	133423	121974	-	-
Lmhp009769	466.29	325.27	465.286	C22H44NO7P	[M+H]+	LysoPE 17:1	溶血磷脂酰乙醇胺 17:1	Lipids	脂质	LPE	溶血磷脂酰乙醇胺	-	1	45490.9	42470.1	63331.4	138398	154916	82716.7	270645	74614.7	148554	79999	91707.1	81491.4	-	-
pme0137	187.07	125.07	188.08	C7H12N2O4	[M-H]-	N-Acetyl-L-Glutamine	N-乙酰-L-谷氨酰胺	Amino acids and derivatives	氨基酸及其衍生物	Amino acids and derivatives	氨基酸及其衍生物	2490-97-3	3	229048	254181	547068	513359	234023	464118	283791	502698	252853	170651	148190	152708	-	-
MWS0552	239.2	223.03	240.209	C15H28O2	[M-H]-	Cis-10-Pentadecenoic Acid(C15:1)	顺-10-十五碳烯酸	Lipids	脂质	Free fatty acids	游离脂肪酸	84743-29-3	2	1.26238e+06	1.02223e+06	1.36549e+06	975382	977358	678702	1.11017e+06	678741	674936	737465	850350	834130	-	-
Hmln003398	503.34	485.33	504.345	C30H48O6	[M-H]-	2,3,19,23-Tetrahydroxyurs-12-en-28-oic acid	2,3,19,23-四羟基熊果-12-烯-28-酸	Terpenoids	萜类	Triterpene	三萜	-	2	52696.7	27235.9	35426.9	56597.4	24297	15995.9	14693	13095.5	15822.1	30792	27460.6	31820.3	-	-
Hmbn004734	455.32	455.32	456.324	C29H44O4	[M-H]-	3,23-Dihydroxy-30-noroleana-12,20(29)-dien-28-oic acid (30-Norhederagenin)	3,23-二羟基-30-去甲基齐墩果-12,20(29)-二烯-28-酸 (30-去甲常春藤皂苷元)	Terpenoids	萜类	Triterpene	三萜	117654-06-5	2	75567.9	67910.7	71338.2	204532	134814	41435.8	37947.3	24911.1	39287.6	86883	96996.7	84114.1	-	-
mws0675	335.06	123.06	334.057	C11H15N2O8P	[M+H]+	β-Nicotinamide mononucleotide	β-烟酰胺单核苷酸	Nucleotides and derivatives	核苷酸及其衍生物	Nucleotides and derivatives	核苷酸及其衍生物	1094-61-7	2	275333	209633	343487	420310	445421	687144	362075	503680	503891	321887	294043	342440	C00455	ko00760,ko01100
Zmcp102703	521.2	131.05	520.194	C26H32O11	[M+H]+	saikolignanoside D	柴胡木脂素苷D	Lignans and Coumarins	木脂素和香豆素	Lignans	木脂素	-	1	8.9458e+06	3.17878e+06	1.95418e+06	482707	1.05143e+06	371722	402065	200009	136903	2.52773e+06	2.88443e+06	2.5426e+06	-	-
pme3083	164.04	120.05	165.043	C8H7NO3	[M-H]-	2-(Formylamino)benzoic acid	2-(甲酰氨基)苯甲酸	Phenolic acids	酚酸类	Phenolic acids	酚酸类	3342-77-6	3	85066.5	40144.1	63541.1	73343.7	37248.5	19751.9	34206.6	44072.3	26496.3	89433	98070.6	84426.5	C05653	ko00380,ko01100
pmf0139	179.06	59.01	180.063	C6H12O6	[M-H]-	D-Galactose	D-半乳糖	Others	其它类	Saccharides	糖类	59-23-4	3	699678	1.28378e+06	762602	799509	761644	570612	308006	712017	442009	693782	641538	595401	C00124	ko00052,ko01100
Lskp211452	505.35	469.33	504.345	C30H48O6	[M+H]+	2,3,19,23-Tetrahydroxyolean-12-en-28-oic acid (Arjungenin)(ISO2)	2,3,19,23-四羟基齐墩果-12-烯-28-酸 (阿江榄仁素)(ISO2)	Terpenoids	萜类	Triterpene	三萜	-	2	178866	774498	611780	1.58805e+06	1.00642e+06	1.11846e+06	1.00032e+06	914640	628296	1.08918e+06	1.26774e+06	1.16234e+06	-	-
pmb0484	104.11	60.08	104.107	C5H14NO+	[M]+	Choline	胆碱	Alkaloids	生物碱	Alkaloids	生物碱	62-49-7	3	3.2804e+07	3.17119e+07	4.1288e+07	3.13964e+07	3.80007e+07	2.79638e+07	3.12529e+07	3.29643e+07	3.75482e+07	3.20767e+07	3.73839e+07	3.53049e+07	C00114	ko00260,ko00564,ko01100,ko02010
pmn001667	577.14	407.08	578.142	C30H26O12	[M-H]-	Procyanidin B4	原花青素 B4	Tannins	鞣质	Proanthocyanidins	原花青素	29106-51-2	3	18247.7	106968	5242.22	78589.1	97299.2	130717	38764.2	24037.8	29130	37537.6	42520.7	43382.3	C10238	-
pme0075	188.06	128.04	189.064	C7H11NO5	[M-H]-	N-Acetyl-L-glutamic acid	N-乙酰-L-谷氨酸	Amino acids and derivatives	氨基酸及其衍生物	Amino acids and derivatives	氨基酸及其衍生物	1188-37-0	3	36097.1	12618.9	26038.8	22949.1	64988.9	15945.6	124339	12111.5	15951.8	26535.9	30955.1	28921.4	C00624	ko00220,ko01100,ko01110,ko01210,ko01230
mws0251	127.05	110.02	126.043	C5H6N2O2	[M+H]+	Thymine	胸腺嘧啶	Nucleotides and derivatives	核苷酸及其衍生物	Nucleotides and derivatives	核苷酸及其衍生物	65-71-4	3	55198.8	43220	48587.8	46067.8	47605.7	11799.2	11549.8	11606.4	8984.06	26729	31067.5	28165.7	C00178	ko00240,ko01100,ko01232
Lmmn001294	331.1	153.02	332.111	C14H20O9	[M-H]-	Koaburaside	3,5-二甲氧基-4-羟基苯酚-1-O-葡萄糖苷	Phenolic acids	酚酸类	Phenolic acids	酚酸类	41653-73-0	1	404838	211862	256262	118333	146292	60223.4	224333	61153.6	401577	265196	244747	285698	-	-
mws2220	457.08	169.01	458.085	C22H18O11	[M-H]-	Gallocatechin 3-O-gallate*	没食子儿茶素 3-O-没食子酸酯*	Flavonoids	黄酮	Flavanols	黄烷醇类	5127-64-0	2	86030.1	65569.7	49788.2	169161	616030	138612	92231.3	85101.9	63116.6	138072	118292	130435	-	-
MWS201478	253.12	120.09	252.111	C12H16N2O4	[M+H]+	Phe-Ser	L-苯丙氨酸-L-丝氨酸	Amino acids and derivatives	氨基酸及其衍生物	Amino acids and derivatives	氨基酸及其衍生物	16053-39-7	1	131648	104385	124052	231961	122236	91873.4	111542	156557	122441	244902	278735	243887	-	-
Zmhn002227	385.11	223.06	386.121	C17H22O10	[M-H]-	4-O-Glucosyl-sinapate	4-O-葡萄糖基芥子酸	Phenolic acids	酚酸类	Phenolic acids	酚酸类	-	3	50864.8	22248.2	114958	46870.6	99487	33244.1	31614.9	16690.5	41815.1	25798.8	25777.5	22472.4	C02919	-
mws0458	151.04	136.02	152.047	C8H8O3	[M-H]-	Vanillin; 4-Hydroxy-3-Methoxybenzaldehyde	香草醛; 4-羟基-3-甲氧基苯甲醛	Phenolic acids	酚酸类	Phenolic acids	酚酸类	121-33-5	3	4.02946e+06	2.1736e+06	4.22103e+06	5.10659e+06	7.15175e+06	2.21758e+06	1.67598e+06	2.93171e+06	1.32934e+06	3.68127e+06	4.24189e+06	4.2055e+06	C00755	ko00996,ko01100,ko01110
Hmqn003054	329.23	311.22	330.241	C18H34O5	[M-H]-	9,10,11-Trihydroxy-12-octadecenoic acid	9,10,11-三羟基-12-十八碳烯酸	Lipids	脂质	Free fatty acids	游离脂肪酸	61911-67-9	1	12440.5	10573.8	15938.6	32577.3	35175.8	46426.2	12326.2	15164.4	11367.3	21368.8	23917.5	20677	-	-
mws0028	167.03	108.02	168.042	C8H8O4	[M-H]-	Vanillic acid	香草酸	Phenolic acids	酚酸类	Phenolic acids	酚酸类	121-34-6	3	120277	88748.4	274959	117880	127553	62498.7	41956	62567.7	61277.6	103544	105288	90983.5	C06672	-
Lmzn001983	375.13	135.05	376.137	C16H24O10	[M-H]-	D-Threo-guaiacylglycerol-7-O-β-D-glucoside	D-苏式-愈创木基甘油-7-O-β-D-葡萄糖苷	Phenolic acids	酚酸类	Phenolic acids	酚酸类	-	1	666053	514768	386962	201902	290570	207470	109542	76525.1	116657	171782	195430	198864	-	-
pmb0686	537.12	289	536.117	C24H24O14	[M+H]+	Eriodictyol-7-O-(6''-malonyl)glucoside	圣草酚-7-O-(6''-丙二酰)葡萄糖苷	Flavonoids	黄酮	Flavanones	二氢黄酮	-	3	25956.9	34486.5	26229.9	18864.4	25316	12542.4	25838.7	23622.1	18914.9	37405.6	37719.3	42899.6	-	-
Lmhp008833	494.32	184.07	493.317	C24H48NO7P	[M+H]+	LysoPC 16:1(2n isomer)*	溶血磷脂酰胆碱 16:1(2n异构)*	Lipids	脂质	LPC	溶血磷脂酰胆碱	-	1	2.26503e+06	450561	828610	1.10596e+06	883997	473295	399893	276494	198488	950950	1.06491e+06	917915	-	-
Lmzn106829	453.34	453.34	454.345	C30H46O3	[M-H]-	3-Oxolup-20(29)-en-28-oic acid (Betulonic acid)	3-羰基羽扇豆-20(29)-烯-28-酸 (白桦脂酮酸)	Terpenoids	萜类	Triterpene	三萜	4481-62-3	3	291547	129418	190664	399370	402374	99040	105838	35880.8	34201.8	156603	162050	181632	-	-
mws4053	455.35	455.35	456.36	C30H48O3	[M-H]-	3-Hydroxyurs-12-en-28-oic acid (Ursolic acid)*	3-羟基熊果-12-烯-28-酸 (熊果酸)*	Terpenoids	萜类	Triterpene	三萜	77-52-1	1	651282	450636	308766	1.07771e+06	474876	271013	374926	136881	413819	413272	353138	377768	C08988	-
Qmgp102504	332.13	152.07	331.132	C20H17N3O2	[M+H]+	Angustoline	牛眼马钱灵/安枯斯特林碱	Alkaloids	生物碱	Plumerane	吲哚类生物碱	40041-95-0	2	3.3264e+06	666489	4.06362e+06	487539	574310	502329	359870	420484	354219	1.4703e+06	1.26441e+06	1.4381e+06	-	-
mws0227	132.1	86.1	131.095	C6H13NO2	[M+H]+	L-Leucine*	L-亮氨酸*	Amino acids and derivatives	氨基酸及其衍生物	Amino acids and derivatives	氨基酸及其衍生物	61-90-5	1	9.05115e+06	7.89317e+06	3.09319e+06	4.89869e+06	2.50022e+07	3.98772e+06	3.72257e+07	3.65853e+06	4.58057e+06	1.40262e+07	1.645e+07	1.54766e+07	C00123	ko00280,ko00290,ko00966,ko00970,ko01100,ko01110,ko01210,ko01230,ko02010
Zaxn005652	315.2	315.2	316.204	C20H28O3	[M-H]-	Pisiferic acid	日本花柏酸	Terpenoids	萜类	Ditepenoids	二萜	67494-15-9	2	135698	52407.7	381136	383227	101698	33324	43214.7	154402	302439	226002	224522	257814	C09163	ko00904,ko01110
Hayp003458	398.13	237.07	397.127	C20H19N3O6	[M+H]+	Dichotomine G	Dichotomine G	Alkaloids	生物碱	Alkaloids	生物碱	-	1	3.3771e+06	39667.3	499887	612184	163165	438288	153073	24059.9	134919	1.18217e+06	1.36064e+06	1.19573e+06	-	-
Lmhp010334	517.34	263.24	516.33	C27H48O9	[M+H]+	2-Linoleoylglycerol-1-O-glucoside*	2-亚油酰甘油酯-1-O-葡萄糖苷*	Lipids	脂质	Glycerol ester	甘油酯	-	2	9896.27	5050.59	10040.3	7449.29	6508.08	6786.55	8327.4	3521.82	5941.39	7890.8	9222.1	8338.93	-	-
Wmzn000227	145.06	109.04	146.058	C6H10O4	[M-H]-	2,2-Dimethylsuccinic acid	2,2-二甲基琥珀酸	Organic acids	有机酸	Organic acids	有机酸	597-43-3	3	8893.61	1609.55	5403.74	12718	30810.6	8838.6	101447	13495.8	8259.14	27779.2	24148.5	24381.2	-	-
HJN110	455.36	455.36	456.36	C30H48O3	[M-H]-	3-Hydroxylup-20(29)-en-28-oic acid (Betulinic acid)	3-羟基羽扇豆-20(29)-烯-28-酸 (白桦脂酸)	Terpenoids	萜类	Triterpene	三萜	472-15-1	1	741789	501076	328133	1.03861e+06	531697	317205	382434	179850	494915	424882	397626	465984	C08619	-
Hmcp005535	425.38	191.17	424.37	C30H48O	[M+H]+	α-Amyrenone	α-香树脂酮	Terpenoids	萜类	Triterpene	三萜	638-96-0	2	28134.3	8915.65	33920.7	112503	96735.2	14793.3	5472	5135.3	1659.17	42976.3	47340.2	50491.7	-	-
pmb2228	538.39	184.07	537.379	C27H56NO7P	[M+H]+	LysoPC 19:0	溶血磷脂酰胆碱 19:0	Lipids	脂质	LPC	溶血磷脂酰胆碱	108273-88-7	3	157419	21081.6	87868.6	214700	145992	39109.8	20601.8	25185.6	11639.4	42344.9	49696.4	45491.8	-	-
Sazp004372	371.15	167.07	370.142	C21H22O6	[M+H]+	Bursehernin	裂榄脂素	Lignans and Coumarins	木脂素和香豆素	Lignans	木脂素	-	2	452169	253363	274421	122707	255819	127834	112029	111760	136023	224759	222852	193949	-	-
pmb3023	449.11	287.06	450.116	C21H22O11	[M-H]-	Eriodictyol-8-C-glucoside	圣草酚-8-C-葡萄糖苷	Flavonoids	黄酮	Flavanones	二氢黄酮	1023271-51-3	3	44690.8	64699.7	30888.7	34450.4	36853	42489.9	18816.5	16294.7	17956	25509.9	22491.6	26280.4	-	-
pme1419	164.07	104.07	163.067	C6H13NO2S	[M+H]+	L-Methionine methyl ester	L-甲硫氨酸甲酯	Amino acids and derivatives	氨基酸及其衍生物	Amino acids and derivatives	氨基酸及其衍生物	10332-17-9	3	26768	18246.6	17649.7	11427.3	33903.1	9669.65	30555.7	8914.01	5209.52	27037.7	24441.8	28752.9	-	-
mws1422	275.09	107.05	274.084	C15H14O5	[M+H]+	Epiafzelechin	表阿夫儿茶精	Flavonoids	黄酮	Flavanols	黄烷醇类	24808-04-6	3	55859.8	168394	19872.2	220298	84104.6	160869	274657	93336.3	255844	127596	149019	133322	C12128	ko00941,ko01110
mws4516	130.05	84.05	129.043	C5H7NO3	[M+H]+	Pyroglutamic acid	L-焦谷氨酸	Amino acids and derivatives	氨基酸及其衍生物	Amino acids and derivatives	氨基酸及其衍生物	4042-36-8	1	769800	624407	998488	1.46417e+06	4.36067e+06	1.71867e+06	7.56819e+06	1.40729e+06	1.35059e+06	2.02556e+06	1.9059e+06	2.23683e+06	-	-
Lmbn005487	313.24	251.24	314.246	C18H34O4	[M-H]-	12,13-DHOME; (9Z)-12,13-Dihydroxyoctadec-9-enoic acid	12,13-二羟基十八烷基-9-烯酸	Lipids	脂质	Free fatty acids	游离脂肪酸	263399-35-5	2	59905.8	69021.8	90860.2	59382.3	58063.2	82035.4	26115.8	27328	18068.1	38838	45545.9	43859.8	C14829	ko00591
pmp000441	471.35	453.34	470.34	C30H46O4	[M+H]+	3-Hydroxy-11-oxours-12-en-28-oic acid (11-Keto-ursolic acid)	3-羟基-11-氧代熊果-12-烯-28-酸 (11-酮基-熊果酸)	Terpenoids	萜类	Triterpene	三萜	105870-59-5	2	3.20635e+06	790461	710060	6.65588e+06	2.60483e+06	465201	121528	115074	35233	1.01282e+06	893459	872025	-	-
pmn001492	187.04	123.04	188.047	C11H8O3	[M-H]-	Ayapin	泽兰内酯	Lignans and Coumarins	木脂素和香豆素	Coumarins	香豆素	494-56-4	3	42712.4	34078.4	60017.5	41789.1	56787.9	30606.6	37298.9	43239.6	28685.5	55603.5	47423.4	50023.2	C18078	-
Lhhp102905	371.15	167.07	370.142	C21H22O6	[M+H]+	Fargesin	辛夷脂素	Lignans and Coumarins	木脂素和香豆素	Lignans	木脂素	31008-19-2	2	438083	251428	304259	153189	253207	118096	118682	83330.3	79716.2	173773	187874	159219	C16957	-
Lmsn010604	501.32	421.31	502.329	C30H46O6	[M-H]-	2,3,19-Trihydroxyurs-12-en-23-formyl-28-oic Acid	2,3,19-三羟基熊果-12-烯-23-甲酰-28-酸	Terpenoids	萜类	Triterpene	三萜	-	2	6307.55	3712.45	5219.52	24220.1	3930.52	1824.53	9	9	9	49949.7	45934	54189.9	-	-
MWSslk183	255.07	181.07	254.058	C15H10O4	[M+H]+	7,8-Dihydroxy-4-phenylcoumarin	7,8-二羟基-4-苯基香豆素	Lignans and Coumarins	木脂素和香豆素	Coumarins	香豆素	842-01-3	2	6.25103e+07	3.41271e+06	4.49643e+07	3.76893e+07	1.03024e+07	2.60025e+07	6.7645e+06	1.59785e+06	1.54508e+07	2.59368e+07	30585029	2.78945e+07	-	-
Zbsp011826	441.37	441.37	440.365	C30H48O2	[M+H]+	3-Hydroxylup-20(29)-en-28-al (Betulinaldehyde)	3-羟基羽扇豆-20(29)-烯-28-醛 (白桦脂醛)	Terpenoids	萜类	Triterpene	三萜	13159-28-9	2	949605	132328	523346	1.94732e+06	350183	105932	9	9	9	428600	465485	394107	-	-
mws0282	203.08	116.05	204.09	C11H12N2O2	[M-H]-	L-Tryptophan	L-色氨酸	Amino acids and derivatives	氨基酸及其衍生物	Amino acids and derivatives	氨基酸及其衍生物	73-22-3	1	4.95782e+06	6.49641e+06	682179	2.46976e+06	1.218e+07	3.0131e+06	6.25145e+06	1.13203e+06	875142	4.08532e+06	4.72031e+06	4.75118e+06	C00078	ko00260,ko00380,ko00400,ko00901,ko00966,ko00970,ko00996,ko01100,ko01110,ko01210,ko01230,ko01240
MWS2910	242.11	126.07	241.106	C10H15N3O4	[M+H]+	5-Methyl-2'-Deoxycytidine	5-甲基-2'-脱氧胞苷	Nucleotides and derivatives	核苷酸及其衍生物	Nucleotides and derivatives	核苷酸及其衍生物	838-07-3	3	59137.8	34891.7	71571.2	35696.7	18324.7	21999.3	18100.9	17856.7	4360.09	53006.7	58766.3	62612.6	C03592	-
Haxp007330	179.06	135.01	178.063	C10H10O3	[M+H]+	p-Methoxycinnamic acida	对甲氧基肉桂酸	Others	其它类	Others	其它	-	2	60265.6	63043	103827	35113.5	32906.5	9364.39	7754.82	7846.3	13433.8	26550.3	23871.3	28200.4	-	-
mws0281	191.02	111.01	192.027	C6H8O7	[M-H]-	Citric Acid	柠檬酸	Organic acids	有机酸	Organic acids	有机酸	77-92-9	1	5.93274e+06	1.10809e+07	2.18481e+07	4.67113e+06	7.84007e+06	8.76278e+06	3.80512e+07	1.13464e+07	1.47322e+07	9.06505e+06	1.03606e+07	1.06442e+07	C00158	ko00020,ko00250,ko00630,ko01100,ko01110,ko01200,ko01210,ko01230,ko01240
mws0344	165.04	75.01	166.048	C5H10O6	[M-H]-	D-Xylonic acid	D-木糖酸	Others	其它类	Saccharides	糖类	526-91-0	3	137665	385742	1.21775e+06	839361	773401	586214	652988	1.48968e+06	366391	448551	515031	444976	C00502	ko00040,ko01100
pme0436	577.14	407.08	578.142	C30H26O12	[M-H]-	Procyanidin B3	原花青素 B3	Tannins	鞣质	Proanthocyanidins	原花青素	23567-23-9	2	183268	673885	39919.9	807187	886840	1.22946e+06	558141	315646	287099	270473	319270	304747	-	-
pmb2871	315.07	153.02	316.079	C13H16O9	[M-H]-	1-O-Gentisoyl-β-D-glucoside	1-O-龙胆酰-β-D-葡萄糖	Phenolic acids	酚酸类	Phenolic acids	酚酸类	23445-11-6	1	2.18178e+06	434043	123675	203613	758975	215250	126847	57868.5	68768.8	649362	764389	684037	-	-
HX1353	177.05	89.04	176.047	C10H8O3	[M+H]+	7-methoxycoumarin(ISO2)	7-甲氧基香豆素(ISO2)	Lignans and Coumarins	木脂素和香豆素	Coumarins	香豆素	-	1	5.53488e+06	2.23697e+06	949985	382297	948885	642255	297872	266423	831320	2.19355e+06	1.91141e+06	2.24277e+06	-	-
mws0367	277.22	277.22	278.225	C18H30O2	[M-H]-	α-Linolenic Acid*	α-亚麻酸*	Lipids	脂质	Free fatty acids	游离脂肪酸	463-40-1	1	1.17962e+07	9.99602e+06	9.82667e+06	1.61966e+07	1.02933e+07	8.5453e+06	1.10599e+07	5.75857e+06	7.71259e+06	1.12356e+07	1.26824e+07	1.32716e+07	C06427	ko00592,ko01040,ko01100,ko01110
pme0026	147.11	84.08	146.106	C6H14N2O2	[M+H]+	L-Lysine	L-赖氨酸	Amino acids and derivatives	氨基酸及其衍生物	Amino acids and derivatives	氨基酸及其衍生物	56-87-1	3	2.06222e+07	7.79645e+06	2.0766e+07	2.14544e+07	6.0693e+07	2.89281e+07	1.06302e+08	3.63112e+07	2.68507e+07	3.24074e+07	3.78282e+07	3.31699e+07	C00047	ko00300,ko00310,ko00470,ko00780,ko00960,ko00970,ko01100,ko01110,ko01210,ko01230,ko02010
pme2527	133.1	116.07	132.09	C5H12N2O2	[M+H]+	L-Ornithine	L-鸟氨酸	Amino acids and derivatives	氨基酸及其衍生物	Amino acids and derivatives	氨基酸及其衍生物	70-26-8	3	10055.5	1966.6	27266.6	8995.31	877904	34915.7	3.12292e+06	37058	6634.12	264406	305416	264058	C00077	ko00220,ko00330,ko00470,ko00480,ko01100,ko01110,ko01210,ko01230,ko02010
pmd0160	454.29	313.27	453.286	C21H44NO7P	[M+H]+	LysoPE 16:0(2n isomer)*	溶血磷脂酰乙醇胺 16:0(2n异构)*	Lipids	脂质	LPE	溶血磷脂酰乙醇胺	-	1	3.29888e+06	4.04062e+06	2.56555e+06	6.03125e+06	9.82482e+06	6.78532e+06	1.67397e+07	9.48941e+06	1.29776e+07	8.54408e+06	1.01398e+07	9.29345e+06	-	-
MWSslk132	285.21	223.21	286.214	C16H30O4	[M-H]-	Hexadecanedioic acid	十六烷基二酸	Lipids	脂质	Free fatty acids	游离脂肪酸	505-54-4	2	50291.8	58049	61823.6	52163.5	49291.8	38615.7	24041	22607.5	22174.1	38523.3	35904.4	32435.1	C19615	ko00073,ko01100
pmb0639	757.22	595.2	756.211	C33H40O20	[M+H]+	Apigenin-8-C-glucoside-7-O-Sophoroside	芹菜素-8-C-葡萄糖苷-7-O-槐糖苷	Flavonoids	黄酮	Flavones	黄酮	-	3	28217.8	2632.29	312982	25362.1	166378	27290.5	28062.3	22416.5	60836.4	65918.2	75363.9	64550.3	-	-
Wacn005438	477.27	161.04	418.257	C21H38O8	[M+CH3COOH-H]-	Hydroxypentadecenoic acid glucoside	羟基十五碳烯酸葡萄糖苷	Lipids	脂质	Free fatty acids	游离脂肪酸	-	3	15975	5939.12	12370	9792.5	11557.2	5243.6	945.096	11442.3	4138.49	8905.45	10552.4	10051.4	-	-
mws1050	148.06	88.04	147.053	C5H9NO4	[M+H]+	O-Acetylserine	O-乙酰丝氨酸	Amino acids and derivatives	氨基酸及其衍生物	Amino acids and derivatives	氨基酸及其衍生物	5147-00-2	3	163002	139551	260564	176987	376056	184190	317806	196907	160797	208539	240988	244722	C00979	ko00270,ko00908,ko00920,ko01100,ko01110,ko01200,ko01230,ko04122
Lmhp010162	468.31	327.29	467.301	C22H46NO7P	[M+H]+	LysoPE 17:0	溶血磷脂酰乙醇胺 17:0	Lipids	脂质	LPE	溶血磷脂酰乙醇胺	-	2	328306	148779	440300	463937	867257	478773	509236	451707	503547	446487	491779	414231	-	-
mws1375	304.15	185.09	303.143	C12H21N3O6	[M+H]+	Nicotianamine	烟胺	Alkaloids	生物碱	Alkaloids	生物碱	34441-14-0	3	774916	534954	633944	1.7202e+06	1.36096e+06	1.11669e+06	885413	1.40404e+06	1.6536e+06	498600	420581	476685	C05324	ko00270,ko00999,ko01100,ko01110
Lmsp004632	287.06	269.04	286.048	C15H10O6	[M+H]+	Scutellarein (5,6,7,4'-Tetrahydroxyflavone)	野黄芩素	Flavonoids	黄酮	Flavones	黄酮	529-53-3	2	378106	68475.6	119118	172828	95826.9	65552.1	52949.1	17391.8	47190.5	233460	265567	226059	C10184	-
pmd0146	548.37	184.07	547.364	C28H54NO7P	[M+H]+	LysoPC 20:2(2n isomer)*	溶血磷脂酰胆碱 20:2(2n异构)*	Lipids	脂质	LPC	溶血磷脂酰胆碱	-	3	170610	40166.2	36957.8	88620.6	123578	104539	128144	65481.1	72090.4	104410	107624	91038.6	-	-
pme3475	273.08	153.02	272.068	C15H12O5	[M+H]+	Butin; 7,3',4'-Trihydroxyflavanone	紫铆素	Flavonoids	黄酮	Flavanones	二氢黄酮	492-14-8	3	10228.9	15985.2	23673.5	20999	15483.3	12335.9	15737.2	36640.7	23182.1	21918.2	21478.1	18604.4	C09614	ko00941
mws4176	237.12	120.09	236.116	C12H16N2O3	[M+H]+	L-Alanyl-L-Phenylalanine	L-丙氨酰-L-苯丙氨酸	Amino acids and derivatives	氨基酸及其衍生物	Amino acids and derivatives	氨基酸及其衍生物	3061-90-3	2	120257	48221.6	97947	247776	211054	178325	131050	143537	161240	160266	190897	177288	-	-
MWSslk234	219.17	121.07	218.167	C15H22O	[M+H]+	Aristolone	马兜铃酮	Terpenoids	萜类	Sesquiterpenoids	倍半萜	25274-27-5	2	140974	117320	132776	51871.5	64385.9	43366.6	26535.3	22308.4	22918.5	49557.9	43858.3	52116.3	-	-
Hmcp002207	479.12	317.06	478.111	C22H22O12	[M+H]+	Isorhamnetin-7-O-glucoside (Brassicin)*	异鼠李素-7-O-葡萄糖苷 (蔓菁苷)*	Flavonoids	黄酮	Flavonols	黄酮醇	6743-96-0	1	397360	667990	382504	1.62688e+06	3.83491e+06	2.39892e+06	244024	443051	369754	210275	198302	235155	-	-
pmb2999	461.11	299.1	462.116	C22H22O11	[M-H]-	Chrysoeriol-5-O-glucoside	金圣草黄素-5-O-葡萄糖苷	Flavonoids	黄酮	Flavones	黄酮	-	3	10173.7	25515.1	35025.8	139525	139758	246067	29989.4	47090.4	37726.3	34423.5	36881.5	40936.1	-	-
pmb2260	480.31	184.07	479.301	C23H46NO7P	[M+H]+	LysoPC 15:1	溶血磷脂酰胆碱 15:1	Lipids	脂质	LPC	溶血磷脂酰胆碱	-	2	118592	102539	121336	486937	1.34302e+06	721846	1.38721e+06	584360	1.11957e+06	311231	348175	293424	-	-
pme2550	173.01	129.02	174.016	C6H6O6	[M-H]-	Cis-Aconitic acid	顺式乌头酸	Organic acids	有机酸	Organic acids	有机酸	585-84-2	3	436935	491925	1.01987e+06	430584	537690	431344	3.40797e+06	556868	704440	594040	656321	709129	C00417	ko00020,ko00630,ko00660,ko01100,ko01110,ko01210
MWSHY0098	307.08	139.04	306.074	C15H14O7	[M+H]+	Epigallocatechin	表没食子儿茶素	Flavonoids	黄酮	Flavanols	黄烷醇类	970-74-1	2	302754	1.01158e+06	69491	1.10295e+06	439925	732934	1.05895e+06	600857	627604	407348	405493	347272	C12136	ko00941,ko01110
Zmyn005026	283.26	283.26	284.272	C18H36O2	[M-H]-	16-Methylheptadecanoic acid	16-甲基十七烷酸	Lipids	脂质	Free fatty acids	游离脂肪酸	2724-58-5	3	62062780	4.09998e+07	2.66211e+07	3.16919e+07	5.61374e+07	5.04253e+07	5.74299e+07	5.4234e+07	3.31972e+07	2.37668e+07	2.78888e+07	2.42688e+07	C20356	-
pmb2654	460.15	117.9	461.153	C19H27NO12	[M-H]-	Anthranilate-1-O-Sophoroside	邻氨基苯甲酸-1-O-槐糖苷	Phenolic acids	酚酸类	Phenolic acids	酚酸类	-	3	405769	529572	124730	62364.5	183927	66913	1.45245e+06	166428	136991	482239	485594	412897	-	-
mws1366	415.32	415.32	416.329	C27H44O3	[M-H]-	Spirostan-3-ol (Tigogenin)	螺旋甾烷-3-醇 (替告皂苷元;剑麻皂苷元)	Steroids	甾体	Steroid	甾体	77-60-1	2	635468	560607	581872	433313	443125	546122	269983	332730	269855	551590	655399	582725	C08914	-
pmb0855	496.34	184.07	495.332	C24H50NO7P	[M+H]+	LysoPC 16:0	溶血磷脂酰胆碱 16:0	Lipids	脂质	LPC	溶血磷脂酰胆碱	17364-16-8	1	1.4704e+07	1.33356e+07	9.64343e+06	3.46208e+07	6.06908e+07	4.40845e+07	6.20392e+07	5.69575e+07	4.80376e+07	3.28237e+07	3.73588e+07	3.15826e+07	-	-
pmp001281	522.36	184.07	521.348	C26H52NO7P	[M+H]+	LysoPC 18:1	溶血磷脂酰胆碱 18:1	Lipids	脂质	LPC	溶血磷脂酰胆碱	-	2	7.06556e+06	5.73081e+06	7.88118e+06	1.94364e+07	2.87944e+07	1.91415e+07	3.81956e+07	2.22536e+07	1.54334e+07	2.09603e+07	1.78192e+07	1.82293e+07	-	-
mws0147	117.06	59.01	118.063	C5H10O3	[M-H]-	β-Hydroxyisovaleric acid	β-羟基异戊酸	Organic acids	有机酸	Organic acids	有机酸	625-08-1	3	257128	285325	249350	249502	235082	245411	221275	225660	222794	138558	162918	162338	C20827	ko00280,ko01100
MWSslk154	277.13	115.04	276.121	C12H20O7	[M+H]+	Triethyl citrate	柠檬酸三乙酯	Organic acids	有机酸	Organic acids	有机酸	77-93-0	3	36714.3	71300.9	75277	40961.1	46462.2	10198.8	16734.5	25235	23557.3	32203.2	36419.2	30658.8	-	-
Zmxp003107	611.16	287.06	610.153	C27H30O16	[M+H]+	Luteolin-7,3'-di-O-glucoside	木犀草素-7,3'-O-二葡萄糖苷	Flavonoids	黄酮	Flavones	黄酮	52187-80-1	3	1.50553e+06	1.32623e+06	536956	332261	1.18621e+06	536096	40943.2	83194.1	27640.2	284365	317497	265503	-	-
mws0906	341.12	179.07	342.132	C16H22O8	[M-H]-	Coniferin	松柏苷	Phenolic acids	酚酸类	Phenolic acids	酚酸类	531-29-3	3	601811	581706	352189	285306	402228	127183	271376	200269	249025	407649	418782	481644	C00761	ko00940,ko01110
pmn001700	455.35	455.35	456.36	C30H48O3	[M-H]-	24,30-Dihydroxy-12(13)-ene-lupeol	24,30-二羟基-12(13)烯-羽扇豆醇	Terpenoids	萜类	Triterpene	三萜	-	1	768857	519142	414798	1.03366e+06	554958	687447	388533	203053	492264	448249	421091	503615	-	-
mws0918	283.06	268.04	284.068	C16H12O5	[M-H]-	Prunetin (5,4'-Dihydroxy-7-methoxyisoflavone)	樱黄素	Flavonoids	黄酮	Isoflavones	异黄酮	552-59-0	3	3030.86	2020.35	3388.87	9	9	9	609.159	1067.22	6353.22	2722.21	2548.44	3052.04	C10521	ko00943
MWSmce039	124.04	80.05	123.032	C6H5NO2	[M+H]+	Isonicotinic acid	异烟酸	Others	其它类	Vitamin	维生素	55-22-1	3	278320	366303	194117	231151	218187	200317	101076	189537	180516	158592	162442	187460	C07446	-
Lmhp002031	245.19	86.1	244.179	C12H24N2O3	[M+H]+	L-Leucyl-L-Leucine	L-亮氨酰-L-亮氨酸	Amino acids and derivatives	氨基酸及其衍生物	Amino acids and derivatives	氨基酸及其衍生物	3303-31-9	2	426858	368184	346510	686681	210511	198445	154328	323562	293208	667317	757888	635042	-	-
mws0014	193.05	134.04	194.058	C10H10O4	[M-H]-	Ferulic acid	阿魏酸	Phenolic acids	酚酸类	Phenolic acids	酚酸类	537-98-4	3	113570	76518.5	126273	140838	152615	62016.5	42116.7	47383.5	58200.4	127799	152395	133391	C01494	ko00940,ko01100,ko01110
Lmqp006559	330.34	312.33	329.329	C20H43NO2	[M+H]+	2-Amino-1,3-eicosanediol	2-氨基-1,3-二十烷二醇	Others	其它类	Saccharides	糖类	-	2	1.37193e+06	1.48714e+06	1.12272e+06	1.32135e+06	1.22702e+06	1.0185e+06	1.11003e+06	1.09816e+06	1.06549e+06	1.86363e+06	2.19773e+06	1.89064e+06	-	-
Lafp007563	219.17	121.1	218.167	C15H22O	[M+H]+	Costal	木香醛	Terpenoids	萜类	Sesquiterpenoids	倍半萜	-	1	784900	576585	1.02964e+06	515791	424047	152053	175878	233635	121057	293722	349363	304250	-	-
zjgp122010	287.05	153.02	286.048	C15H10O6	[M+H]+	7,8,3',4'-tetrahydroxyflavone	7,8,3',4'-四羟基黄酮	Flavonoids	黄酮	Flavones	黄酮	-	2	148866	2774.63	34606.1	122522	15008.2	5934.9	6064.45	2700.33	10253.3	50882.7	51178.8	43120	-	-
mws1060	267.07	135.03	268.081	C10H12N4O5	[M-H]-	9-(Arabinosyl)hypoxanthine	9-(阿拉伯糖基)次黄嘌呤	Nucleotides and derivatives	核苷酸及其衍生物	Nucleotides and derivatives	核苷酸及其衍生物	7013-16-3	3	271365	42551.8	152233	114983	171642	69832.9	407039	48335.6	135247	265406	318023	309040	-	-
pmf0175	157.16	157.16	158.167	C10H22O	[M-H]-	2-Decanol*	2-癸醇*	Others	其它类	Saccharides	糖类	1120-06-5	3	5.60335e+06	5.51018e+06	6.20484e+06	5.60508e+06	5.54533e+06	4.92184e+06	5.03753e+06	5.2053e+06	5.00496e+06	4.35478e+06	5.26654e+06	4.83769e+06	-	-
pme3967	312.13	180.09	311.123	C12H17N5O5	[M+H]+	2-(Dimethylamino)guanosine	2-(二甲基氨基)鸟苷	Nucleotides and derivatives	核苷酸及其衍生物	Nucleotides and derivatives	核苷酸及其衍生物	2140-67-2	3	115052	78872.4	82376.2	100491	66879.3	48180.3	44199.1	71104	64324	109402	132283	123119	-	-
mws0224	150.06	61.01	149.051	C5H11NO2S	[M+H]+	DL-Methionine	DL-蛋氨酸	Amino acids and derivatives	氨基酸及其衍生物	Amino acids and derivatives	氨基酸及其衍生物	59-51-8	3	894751	371183	408821	454085	5.24296e+06	833950	4.05614e+06	606013	563436	1.08223e+06	1.30859e+06	1.22046e+06	-	-
Zbsn012366	455.35	455.35	456.36	C30H48O3	[M-H]-	Oxyallobetulin	Oxyallobetulin	Terpenoids	萜类	Triterpene	三萜	-	3	735529	454491	343849	1.06552e+06	491166	328017	330491	144175	415310	421041	351038	408538	-	-
Lmcn009539	293.25	293.25	294.256	C19H34O2	[M-H]-	E,E,Z-1,3,12-Nonadecatriene-5,14-diol	E,E,Z-1,3,12-十九碳三烯-5,14-二醇	Lipids	脂质	Free fatty acids	游离脂肪酸	-	2	182431	241479	181563	387477	223765	233167	179009	385010	376767	281808	246326	297447	-	-
pmp001230	279.16	121.03	278.152	C16H22O4	[M+H]+	Senkyunolide M	洋川芎内酯 M	Others	其它类	Lactones	内酯类化合物	146986-60-9	1	5.38719e+06	6.02972e+06	6.8245e+06	3.49885e+06	3.47276e+06	2.58382e+06	2.24328e+06	2.06214e+06	2.20884e+06	3.61703e+06	3.11107e+06	3.74216e+06	-	-
mws0256	118.09	72.08	117.079	C5H11NO2	[M+H]+	L-Valine	L-缬氨酸	Amino acids and derivatives	氨基酸及其衍生物	Amino acids and derivatives	氨基酸及其衍生物	72-18-4	1	3.03818e+06	2.88609e+06	1.90162e+06	1.9117e+06	9.29671e+06	1.63852e+06	1.27572e+07	2.27121e+06	2.14651e+06	4.93928e+06	5.97135e+06	5.35586e+06	C00183	ko00280,ko00290,ko00311,ko00460,ko00770,ko00966,ko00970,ko01100,ko01110,ko01210,ko01230,ko01240,ko02010
pmb2826	147.03	87.01	148.037	C5H8O5	[M-H]-	L-Citramalic acid	2-甲基苹果酸	Organic acids	有机酸	Organic acids	有机酸	6236-09-5	3	34605.5	72331.7	91380.6	42748.7	45116	36959.3	135008	47077	49105.5	55996.2	53150.6	46335.7	C02614	ko00660,ko01100
Lmsp102911	487.34	423.33	486.334	C30H46O5	[M+H]+	3-Hydroxyurs-12-ene-27,28-dioic acid (Quinovic acid)	3-羟基熊果-12-烯-27,28-二酸 (喹诺酸)	Terpenoids	萜类	Triterpene	三萜	465-74-7	2	1.86868e+06	2.42868e+06	1.99802e+06	2.04194e+06	1.54418e+06	1.95646e+06	3.24162e+06	2.05132e+06	1.62325e+06	2.20268e+06	1.8273e+06	1.9524e+06	-	-
Wbmp010259	301.22	255.21	300.209	C20H28O2	[M+H]+	3-Hydroxyabieta-8,11,13-trien-7-one	3-羟基松香烷-8,11,13-三烯-7-酮	Terpenoids	萜类	Ditepenoids	二萜	-	2	135364	32470.4	446421	373446	85502.8	19370.2	17261.7	93840	350737	213863	241902	200849	-	-
mws1078	138.06	92.05	137.048	C7H7NO2	[M+H]+	Anthranilic Acid	邻氨基苯甲酸	Phenolic acids	酚酸类	Phenolic acids	酚酸类	118-92-3	3	739424	89239.9	211841	415003	95665.3	32546.7	80824.6	48596.1	63487.3	389359	470004	449930	C00108	ko00380,ko00400,ko00996,ko01100,ko01110,ko01230
Lmmp003266	683.15	303.05	682.138	C29H30O19	[M+H]+	Quercetin-3-O-(2''-O-malonyl)glucoside-7-O-arabinoside	槲皮素-3-O-(2''-O-丙二酰)葡萄糖苷-7-O-阿拉伯糖苷	Flavonoids	黄酮	Flavonols	黄酮醇	-	3	12079.1	16957.6	17392.3	16996.1	15935.3	8904.88	9119.42	9917.3	4291.19	9265.95	10242.8	8447.19	-	-
MWS2984	153.05	136.03	152.045	C4H4N6O	[M+H]+	8-Azaguanine	8-氮鸟嘌呤	Nucleotides and derivatives	核苷酸及其衍生物	Nucleotides and derivatives	核苷酸及其衍生物	134-58-7	3	55291.3	26348.9	40441.2	49289.9	38305	15653	9359.09	9611.61	4822.47	26160.2	28400.8	23391.8	-	-
Lmbn005662	295.23	171.1	296.235	C18H32O3	[M-H]-	9(10)-EpOME;(9R,10S)-(12Z)-9,10-Epoxyoctadecenoic acid	9,10-环氧十八烯酸	Lipids	脂质	Free fatty acids	游离脂肪酸	16833-56-0	1	23984.1	12399.7	22492.6	49661.8	19610.5	13193	7794.1	9003.8	11302.8	25177.4	30139.5	26155.7	C14825	ko00591,ko01100
pmb3142	299.08	137.02	300.084	C13H16O8	[M-H]-	Salicylic acid-2-O-glucoside	水杨酸-2-O-葡萄糖苷	Phenolic acids	酚酸类	Phenolic acids	酚酸类	10366-91-3	3	7.52036e+06	4.29702e+06	4.45115e+06	904329	3.40797e+06	1.06504e+06	869732	1.11011e+06	653818	3.24353e+06	2.73189e+06	3.25171e+06	-	-
Wbmn003185	221.16	221.15	222.162	C14H22O2	[M-H]-	Kobusone	香附可布酮	Terpenoids	萜类	Sesquiterpenoids	倍半萜	24173-71-5	1	164091	188324	197040	172924	166165	151713	165900	152761	163672	121522	142731	145858	-	-
mws1212	209.08	177.05	208.074	C11H12O4	[M+H]+	Ferulic acid methyl ester	阿魏酸甲酯	Phenolic acids	酚酸类	Phenolic acids	酚酸类	2309-07-1	3	64981.9	59096.8	37670.3	43862.8	51436.9	16533.7	21106.5	17343.9	11191.7	76559	85993.9	93001.5	-	-
pmb0818	206.08	145.05	205.074	C11H11NO3	[M+H]+	Methoxyindoleacetic acid	甲氧基吲哚乙酸	Alkaloids	生物碱	Plumerane	吲哚类生物碱	3471-31-6	3	1.34518e+06	1.90356e+06	138637	707736	3.27231e+06	680201	1.46092e+06	314204	218889	923435	1.00744e+06	829133	C05660	ko00380
Lmln010063	205.16	189.13	206.167	C14H22O	[M-H]-	2,6-Di-tert-butylphenol	2,6-二叔丁基苯酚	Phenolic acids	酚酸类	Phenolic acids	酚酸类	128-39-2	3	165345	185779	157456	176462	153431	175408	187379	181613	139994	145140	173579	171535	-	-
pme0001	609.18	301.07	610.19	C28H34O15	[M-H]-	Hesperetin-7-O-neohesperidoside(Neohesperidin)*	橙皮素-7-O-新橙皮糖苷 (新橙皮苷)*	Flavonoids	黄酮	Flavanones	二氢黄酮	13241-33-3	3	7600.97	113511	15463.2	29930.5	9816.48	26659.3	8093.19	2.52357e+06	24634.2	698346	770005	633654	C09806	ko00941
Hagn002504	355.07	85.03	356.09	C19H16O7	[M-H]-	5,7,5'-Trimethoxy-3',4'-methylenedioxyflavonoid	5,7,5'-三甲氧基-3',4'-亚甲二氧基黄酮	Flavonoids	黄酮	Flavones	黄酮	-	2	134522	272142	125972	166605	332465	48286.2	1721.49	107196	81439.8	591078	719251	653271	-	-
Ymjm000100	469.33	423.33	468.324	C30H44O4	[M+H]+	24-Hydroxy-3-oxooleana-11,13(18)-dien-28-oic acid	24-羟基-3-氧代齐墩果-11,13(18)-二烯-28-酸	Terpenoids	萜类	Triterpene	三萜	-	2	931487	1.26727e+06	626179	2.06575e+06	570855	371611	297256	312334	228609	799596	928446	775650	-	-
Jmzn003632	521.2	329.14	522.21	C26H34O11	[M-H]-	Manglieside D	Manglieside D	Lignans and Coumarins	木脂素和香豆素	Lignans	木脂素	-	3	4.64649e+06	2.60117e+06	3.49456e+06	796856	2.56738e+06	1.04681e+06	447004	306296	289802	2.33187e+06	2.41373e+06	2.79664e+06	-	-
Zmdp000972	136.04	91.05	135.035	C4H9NO2S	[M+H]+	S-Methyl-L-cysteine	S-甲基-L-半胱氨酸	Amino acids and derivatives	氨基酸及其衍生物	Amino acids and derivatives	氨基酸及其衍生物	1187-84-4	2	113979	110643	60159.5	89966.8	213040	85027.5	250167	149398	86688.3	195457	185373	223821	C22040	ko02010
Lmbn002072	159.07	97.07	160.074	C7H12O4	[M-H]-	2-Propylsuccinic acid*	2-丙基琥珀酸*	Organic acids	有机酸	Organic acids	有机酸	618-57-5	3	19295.4	22024.3	35801.4	27470.8	17926.7	20005.9	10458.9	11236.7	31491.8	17600.7	21156.7	18303.7	C16657	-
NK10251888	203.15	70.07	202.143	C8H18N4O2	[M+H]+	NG,NG-Dimethyl-L-arginine*	NG,NG-二甲基-L-精氨酸*	Amino acids and derivatives	氨基酸及其衍生物	Amino acids and derivatives	氨基酸及其衍生物	30315-93-6	1	2.96755e+06	741971	456536	700343	1.64789e+06	450614	1.64632e+06	431895	421535	3.1487e+06	2.64216e+06	3.15954e+06	C03626	-
MWS201054	162.08	56.05	161.069	C6H11NO4	[M+H]+	O-Acetyl-L-homoserine	O-乙酰-L-高丝氨酸	Amino acids and derivatives	氨基酸及其衍生物	Amino acids and derivatives	氨基酸及其衍生物	250736-84-6	3	110664	78742.3	161454	86977.2	105012	78443.8	89659	94848.7	56304.3	82534.2	84640.3	98771.3	-	-
Jmzn003343	521.2	329.14	522.21	C26H34O11	[M-H]-	Saikolignanoside A	柴胡木脂素苷 A	Lignans and Coumarins	木脂素和香豆素	Lignans	木脂素	-	2	5.13955e+06	2.66044e+06	3.93181e+06	846292	2.90842e+06	1.14397e+06	439615	356825	307724	2.41279e+06	2.80223e+06	2.93288e+06	-	-
Lmqn000213	665.21	341.11	666.222	C24H42O21	[M-H]-	Stachyose	水苏糖	Others	其它类	Saccharides	糖类	470-55-3	1	404313	599483	740864	589182	862295	545387	699506	1.0778e+06	1.36842e+06	433673	503989	419441	C01613	ko00052,ko01100
Lmhp010757	506.32	365.31	505.317	C25H48NO7P	[M+H]+	LysoPE 20:2*	溶血磷脂酰乙醇胺 20:2*	Lipids	脂质	LPE	溶血磷脂酰乙醇胺	-	1	13318.2	13656.7	11948.6	26139.5	56670.8	31366.9	99709.3	41509	71027.1	34958.8	40019.9	33028.1	-	-
Qmzp101807	343.15	163.07	342.147	C20H22O5	[M+H]+	Avicennol	簕内酯醇	Lignans and Coumarins	木脂素和香豆素	Coumarins	香豆素	56110-68-0	1	32574	50495.6	33206.2	30158.8	28580.9	29526.7	30937.7	29026.7	30685.8	27834.7	33948.2	30231.9	-	-
pme2598	167.03	123.05	168.042	C8H8O4	[M-H]-	3,4-Dihydroxybenzeneacetic acid	3,4-二羟基苯乙酸	Phenolic acids	酚酸类	Phenolic acids	酚酸类	102-32-9	3	62851.3	55562.2	39281.6	80270.8	165667	30827	35420.3	51713.5	45465.9	54218.4	66126	63545.1	C01161	ko00350,ko01100
MWS20182	195.07	136.05	196.074	C10H12O4	[M-H]-	Dihydroferulic Acid	二氢阿魏酸	Phenolic acids	酚酸类	Phenolic acids	酚酸类	1135-23-5	1	657421	738533	359575	432174	655035	365841	434187	339796	350182	503337	531869	611587	-	-
pmp000006	345.1	330.07	344.09	C18H16O7	[M+H]+	Eupatilin (5,7-Dihydroxy-3',4',6-Trimethoxyflavone)*	异泽兰黄素*	Flavonoids	黄酮	Flavones	黄酮	22368-21-4	1	5418.07	6100.61	6761.73	4336.02	7992.59	5796.91	4115.73	816394	6403.86	639691	736059	605298	C10040	-
Wbmn011269	377.23	295.23	378.241	C22H34O5	[M-H]-	Vitexilactone	牡荆内酯	Terpenoids	萜类	Ditepenoids	二萜	61263-49-8	1	46525.6	44353.2	55742.9	176657	183280	240932	40258.1	51364.4	42872.8	90994	99624	111589	-	-
pmb0964	366.18	204.12	365.17	C16H23N5O5	[M+H]+	Isopentenyladenine-7-N-glucoside	异戊烯基腺苷-7-N-葡萄糖苷	Nucleotides and derivatives	核苷酸及其衍生物	Nucleotides and derivatives	核苷酸及其衍生物	-	3	146156	194674	183729	49232.7	63089.6	55852	55883.6	71430.2	72185.3	105401	128123	125066	-	-
mws1489	283.26	283.26	284.272	C18H36O2	[M-H]-	Stearic Acid	硬脂酸(十八烷酸)	Lipids	脂质	Free fatty acids	游离脂肪酸	57-11-4	2	5.60301e+07	3.82632e+07	2.592e+07	2.76866e+07	5.42887e+07	4.58584e+07	5.34549e+07	5.00277e+07	2.7199e+07	2.16326e+07	2.60672e+07	2.21968e+07	C01530	ko00061,ko01040,ko01100
pme0264	243.1	127.05	242.09	C10H14N2O5	[M+H]+	Thymidine	胸苷	Nucleotides and derivatives	核苷酸及其衍生物	Nucleotides and derivatives	核苷酸及其衍生物	50-89-5	3	670424	279067	534959	679822	432995	354579	146456	240576	123544	289149	236988	280147	C00214	ko00240,ko01100,ko01232
HJN025	123.04	122.04	124.052	C7H8O2	[M-H]-	4-Hydroxybenzyl Alcohol	4-羟基苄醇	Phenolic acids	酚酸类	Phenolic acids	酚酸类	623-05-2	3	5296.1	6097.38	5330.55	6745.1	7912.21	994.647	2896.39	3820.01	1307.39	5700.35	4661.3	4987.98	C17467	-
MWSmce607	120.07	56.05	119.058	C4H9NO3	[M+H]+	DL-Threonine	DL-苏氨酸	Amino acids and derivatives	氨基酸及其衍生物	Amino acids and derivatives	氨基酸及其衍生物	80-68-2	3	489013	475465	436877	540396	1.01648e+06	509031	906413	452766	366297	458685	563608	500351	-	-
Lmyn003028	431.16	269.1	432.163	C19H28O11	[M-H]-	Benzyl-β-gentiobioside	苄基-β-龙胆二糖苷	Phenolic acids	酚酸类	Phenolic acids	酚酸类	56775-64-5	2	89662.6	81907.5	87268.2	65965.1	124228	98567.9	36274.2	90886.5	92464.4	91263.7	107015	88406.5	-	-
pmp000271	505.35	423.33	504.345	C30H48O6	[M+H]+	1,2,3,19-Tetrahydroxyurs-12-en-28-oic acid	1,2,3,19-四羟基熊果-12-烯-28-酸	Terpenoids	萜类	Triterpene	三萜	120211-98-5	2	19629.7	7909.21	9278.59	24288.5	21060.7	5848.54	3951.42	4226.59	2588.67	8880.62	7659.52	7274.38	-	-
Zmyn000110	258.04	78.96	259.046	C6H14NO8P	[M-H]-	D-Glucosamine 1-phosphate	D-氨基葡萄糖-1-磷酸	Others	其它类	Saccharides	糖类	2152-75-2	3	4152.42	92475.7	12707	172674	106611	55604.1	12307.9	17474	53472.9	33549.6	35888.2	41161.6	C06156	ko00520,ko01100,ko01250
Zmcp102206	381.2	299.2	382.214	C24H30O4	[M-H]-	(Z)-3,8-Dihydro 6,6·;7,3'a-diligustilide	(Z')-3,8-二氢-6,6;7,3'α-二藁本内酯	Others	其它类	Others	其它	-	1	765917	128836	3.22012e+06	3.69222e+06	557765	66976.5	74245.9	1.16774e+06	2.7363e+06	1.94403e+06	1.70365e+06	2.10712e+06	-	-
mws0425	129.02	85.03	130.027	C5H6O4	[M-H]-	Citraconic acid	柠康酸	Organic acids	有机酸	Organic acids	有机酸	498-23-7	3	126561	97202.4	258369	77395.5	112167	9242.31	83252.4	30006.9	27737	119869	129359	147411	C02226	ko00290,ko00660,ko01100,ko01210
pmb3079	300.05	96.97	301.056	C8H16NO9P	[M-H]-	N-Acetyl-D-glucosamine-1-phosphate	N-乙酰-D-葡萄糖胺-1-磷酸	Others	其它类	Saccharides	糖类	6866-69-9	3	48330.3	89233.3	73010	110117	118267	89527.6	13105.1	83152.5	60818.3	61359.9	65484.9	53022.4	C04256	-
ML10197929	130.09	88.04	131.07	C4H9N3O2	[M-H]-	Creatine	肌酸	Organic acids	有机酸	Organic acids	有机酸	57-00-1	3	132679	153038	196530	121736	172157	151188	81456.3	109383	34401.3	62378.9	76343.7	74257.8	C00300	ko00260,ko00330,ko01100
Lmhp010514	506.32	365.31	505.317	C25H48NO7P	[M+H]+	LysoPE 20:2(2n isomer)*	溶血磷脂酰乙醇胺 20:2(2n异构)*	Lipids	脂质	LPE	溶血磷脂酰乙醇胺	-	1	14790	15439.5	10719.2	26358.3	59361	34751.6	108583	43329.1	79029.6	33214.4	41040.7	36612.9	-	-
Lcsn000194	699.27	489.19	700.273	C36H44O14	[M-H]-	isatindigosesquilignan B	isatindigosesquilignan B	Lignans and Coumarins	木脂素和香豆素	Lignans	木脂素	-	3	125258	70827.3	109350	19495.7	52054	41817.3	14750.6	14329.9	19272.9	77067.9	63228.9	75817.4	-	-
MWS2426	332.13	203.08	333.132	C16H19N3O5	[M-H]-	Tryptophan glutamic acid	色氨酰谷氨酸	Amino acids and derivatives	氨基酸及其衍生物	Amino acids and derivatives	氨基酸及其衍生物	36099-95-3	3	2213.52	2054.29	2569.16	3846.02	3389.96	2814.93	4368.36	1278.17	3091.24	5147.2	6353.38	5998.22	-	-
Lmhp007840	534.36	184.07	533.348	C27H52NO7P	[M+H]+	LysoPC 19:2*	溶血磷脂酰胆碱 19:2*	Lipids	脂质	LPC	溶血磷脂酰胆碱	-	2	171972	17525.7	39127.2	210531	130292	32970	24680.4	28236.7	18016.4	48943	59818.6	51516.5	-	-
Lhmp100804	795.45	439.36	794.445	C42H66O14	[M+H]+	Soyasaponin E glucuronic acid glucoside(iso-02)	大豆皂苷元E葡萄糖醛酸葡萄糖苷(iso-02)	Terpenoids	萜类	Triterpene Saponin	三萜皂苷	-	2	508717	420683	403895	391411	536638	552317	577471	472616	547502	478708	486071	398810	-	-
Lmhp001732	263.14	70.06	262.132	C14H18N2O3	[M+H]+	L-Prolyl-L-Phenylalanine	L-脯氨酰-L-苯丙氨酸	Amino acids and derivatives	氨基酸及其衍生物	Amino acids and derivatives	氨基酸及其衍生物	13589-02-1	2	50066.8	38181.7	49044.1	54421.2	66067.3	73228.1	79589	36043	45890.4	75529.8	71572.6	61208.1	-	-
Lmhp008718	506.32	184.07	505.317	C25H48NO7P	[M+H]+	LysoPC 17:2	溶血磷脂酰胆碱 17:2	Lipids	脂质	LPC	溶血磷脂酰胆碱	-	1	140936	38369.9	75998.5	160516	319844	155115	170384	118777	138505	83644.4	102158	87794.2	-	-
mws0752	185.15	185.16	186.162	C11H22O2	[M-H]-	Undecylic Acid	十一烷酸	Lipids	脂质	Free fatty acids	游离脂肪酸	112-37-8	2	761479	972314	992592	871620	844797	736559	820599	684329	638786	677591	727813	587776	C17715	-
pmp001198	132.1	57.03	131.095	C6H13NO2	[M+H]+	6-Deoxyfagomine	6-脱氧荞麦碱	Alkaloids	生物碱	Piperidine alkaloids	哌啶类生物碱	197449-09-5	1	1.12049e+06	1.13903e+06	494879	633963	4.04062e+06	699427	6.98082e+06	546571	682802	1.80253e+06	2.21724e+06	1.93164e+06	-	-
pme0120	118.09	101.06	117.079	C5H11NO2	[M+H]+	5-Aminovaleric acid	5-氨基戊酸	Organic acids	有机酸	Organic acids	有机酸	660-88-8	3	37690	24400.6	21542	51925.9	92398	55720.6	34372.5	40995.4	52835.4	52716.9	48523.6	59890.4	C00431	ko00310,ko00330,ko00470,ko01100
mws0629	281.11	166.09	280.106	C13H16N2O5	[M+H]+	L-Aspartyl-L-Phenylalanine	L-天冬氨酰-L-苯丙氨酸	Amino acids and derivatives	氨基酸及其衍生物	Amino acids and derivatives	氨基酸及其衍生物	13433-09-5	1	25015.2	38883.7	37107.6	31044.1	34772.1	15206.8	33280.3	4540.22	11074	27563.3	22181.3	25392.3	-	-
Lmhp001461	229.15	70.07	228.147	C11H20N2O3	[M+H]+	L-Prolyl-L-Leucine	L-脯氨酰-L-亮氨酸	Amino acids and derivatives	氨基酸及其衍生物	Amino acids and derivatives	氨基酸及其衍生物	52899-07-7	1	353379	168704	292175	2.42972e+06	480879	371228	497150	247632	1.16048e+06	998598	1.16932e+06	956407	-	-
Lmwp102712	225.19	67.06	224.178	C14H24O2	[M+H]+	Goshuyic acid	吴茱萸酸	Lipids	脂质	Free fatty acids	游离脂肪酸	39039-37-7	3	50311.6	47070.1	103499	61851.5	94007.6	34955.9	18580.9	48684.3	21322.1	179242	147345	178619	-	-
pme0500	503.16	323.1	504.169	C18H32O16	[M-H]-	D-Melezitose	D-松三糖	Others	其它类	Saccharides	糖类	597-12-6	1	1.72712e+06	4.58193e+06	567015	1.09093e+06	1.26885e+06	794786	776095	776446	1.05621e+06	941802	915199	765702	C08243	-
mws1164	179.06	59.01	180.063	C6H12O6	[M-H]-	D-Fructose	D-果糖	Others	其它类	Saccharides	糖类	57-48-7	3	1.04309e+06	1.97073e+06	1.33292e+06	776345	1.21153e+06	1.0245e+06	566172	1.04359e+06	726759	1.08366e+06	1.25044e+06	1.34721e+06	C05003	-
pme3163	289.03	96.97	290.04	C7H15O10P	[M-H]-	D-Sedoheptuiose 7-phosphate	D-景天庚酮糖 7-磷酸	Others	其它类	Saccharides	糖类	2646-35-7	3	1.95494e+06	2.99698e+06	5.0445e+06	2.19266e+06	3.33052e+06	2.99262e+06	1.21079e+07	3.34135e+06	3.57921e+06	3.31641e+06	3.3674e+06	4.01157e+06	-	-
Lmhp010190	522.36	184.07	521.348	C26H52NO7P	[M+H]+	LysoPC 18:1(2n isomer)	溶血磷脂酰胆碱 18:1(2n异构)	Lipids	脂质	LPC	溶血磷脂酰胆碱	-	1	2.94301e+07	6.38772e+06	9.97949e+06	1.66115e+07	1.6902e+07	1.07565e+07	1.45155e+07	9.16994e+06	7.65157e+06	1.76265e+07	1.9042e+07	1.53105e+07	-	-
pmb2620	207.07	133.07	208.074	C11H12O4	[M-H]-	3,4-Dimethoxycinnamic acid	3,4-二甲氧基肉桂酸	Phenolic acids	酚酸类	Phenolic acids	酚酸类	2316-26-9	3	29399.6	7549.71	43066	17012	11541.8	10833.7	13257.5	7184.93	9459.76	5703.21	6437.4	7102.03	-	-
Smgp004575	465.1	303.05	464.096	C21H20O12	[M+H]+	Quercetin-5-O-β-D-glucoside*	槲皮素-5-O-β-D-葡萄糖苷*	Flavonoids	黄酮	Flavonols	黄酮醇	-	1	669856	1.09529e+06	357360	5.92528e+06	5.76164e+06	6.06335e+06	936828	1.72961e+06	700242	1.00671e+06	1.20173e+06	993735	-	-
Lmhp009129	482.32	184.07	481.317	C23H48NO7P	[M+H]+	LysoPC 15:0(2n isomer)*	溶血磷脂酰胆碱 15:0(2n异构)*	Lipids	脂质	LPC	溶血磷脂酰胆碱	-	1	938426	1.21359e+06	975714	2.96926e+06	8.63173e+06	5.16245e+06	7.90335e+06	3.96157e+06	5.18541e+06	2.36092e+06	2.76898e+06	2.26087e+06	-	-
Lmzn206829	453.34	453.34	454.345	C30H46O3	[M-H]-	3-Oxoolean-12-en-28-oic Acid (Oleanonic acid)	3-氧代齐墩果-12-烯-28-酸 (齐墩果酮酸)	Terpenoids	萜类	Triterpene	三萜	17990-42-0	3	278965	87476.3	208240	393457	422726	103822	80026	39260.9	43898.6	164395	136237	167089	-	-
Lbhp011911	577.15	165.05	576.148	C27H28O14	[M+H]+	Sinapyl fraxin	芥子酰梣皮苷	Lignans and Coumarins	木脂素和香豆素	Coumarins	香豆素	-	2	425419	891359	552464	4.73189e+06	1.44265e+06	2.68185e+06	2.47255e+06	4.23426e+06	2.83739e+06	781464	933263	770923	-	-
Lmzn006582	469.34	469.34	470.34	C30H46O4	[M-H]-	2-Formyl-3-hydroxy-A(1)-norlup-20(29)-en-28-oic acid (Colubrinic acid)	2-甲酰-3-羟基-A(1)-去甲基羽扇豆-20(29)-烯-28-酸 (Colubrinic acid)	Terpenoids	萜类	Triterpene	三萜	-	2	1.75818e+06	900640	789266	925618	1.09086e+06	300947	309833	224198	311542	774429	910454	961667	-	-
Lmhp008337	426.26	285.24	425.254	C19H40NO7P	[M+H]+	LysoPE 14:0(2n isomer)*	溶血磷脂酰乙醇胺 14:0(2n异构)*	Lipids	脂质	LPE	溶血磷脂酰乙醇胺	-	2	44323	57687.9	55800.8	99135.2	158114	101774	406394	146470	232171	117538	140836	116583	-	-
pme0151	115.05	98.02	114.043	C4H6N2O2	[M+H]+	5,6-Dihydrouracil	5,6-二氢尿嘧啶	Nucleotides and derivatives	核苷酸及其衍生物	Nucleotides and derivatives	核苷酸及其衍生物	504-07-4	3	246722	232080	200392	137780	175869	112127	135507	133821	138855	75619.5	93637.6	81477.2	C00429	ko00240,ko00410,ko00770,ko01100
pmd0130	468.31	184.07	467.301	C22H46NO7P	[M+H]+	LysoPC 14:0	溶血磷脂酰胆碱 14:0	Lipids	脂质	LPC	溶血磷脂酰胆碱	20559-16-4	1	170800	221891	245629	821922	1.72456e+06	1.02828e+06	1.63011e+06	1.17588e+06	979418	559817	646201	522470	-	-
Lmmp005125	271.1	167.03	270.089	C16H14O4	[M+H]+	Pinostrobin Chalcone	球松素查耳酮	Flavonoids	黄酮	Chalcones	查耳酮	18956-15-5	3	64928.9	7089.34	25939.6	131794	5538.94	609.359	1157.75	4062.72	5422.34	75310.9	63913	61403.2	-	-
pme0534	195.05	75.01	196.058	C6H12O7	[M-H]-	Gluconic acid	葡萄糖酸	Others	其它类	Saccharides	糖类	526-95-4	3	591440	1.12216e+06	1.80046e+06	2.05421e+06	1.71778e+06	1.39958e+06	1.09298e+06	2.3231e+06	1.20778e+06	1.04928e+06	1.30618e+06	1.23908e+06	C00257	ko00030,ko01100,ko01110,ko01200
Lskp211410	497.31	335.27	496.304	C27H44O8	[M+H]+	1,2,3,14,20,22,25-Heptahydroxycholest-7-en-6-one (Integristerone A)	1,2,3,14,20,22,25-七羟基胆甾烷-7-烯-6-酮 (Integristerone A)	Steroids	甾体	Steroid	甾体	-	3	6507.46	6120.73	3286.85	4130.9	5031.87	4109.88	7497.22	2780.49	6050.99	10756	11934.3	9535.96	-	-
pme0021	166.09	120.08	165.079	C9H11NO2	[M+H]+	L-Phenylalanine	L-苯丙氨酸	Amino acids and derivatives	氨基酸及其衍生物	Amino acids and derivatives	氨基酸及其衍生物	63-91-2	1	5.15304e+06	5.00033e+06	4.06514e+06	5.54744e+06	1.39e+07	4.56409e+06	1.97186e+07	3.79175e+06	4.03631e+06	8.31949e+06	1.03676e+07	9.85552e+06	C00079	ko00360,ko00400,ko00460,ko00470,ko00940,ko00960,ko00966,ko00970,ko00996,ko00999,ko01100,ko01110,ko01210,ko01230,ko02010
mws2104	193.07	59.01	194.079	C7H14O6	[M-H]-	D-Pinitol	D-松醇	Others	其它类	Saccharides	糖类	10284-63-6	3	188699	345946	390191	218087	229564	201959	435306	263308	231654	158289	141583	177329	C03844	-
pme1210	150.06	61.01	149.051	C5H11NO2S	[M+H]+	L-Methionine	L-甲硫氨酸	Amino acids and derivatives	氨基酸及其衍生物	Amino acids and derivatives	氨基酸及其衍生物	63-68-3	3	858317	359946	305510	324339	3.93398e+06	683269	3.23514e+06	394939	565881	1.12769e+06	1.03471e+06	1.29184e+06	C00073	ko00270,ko00470,ko00966,ko00970,ko00999,ko01100,ko01110,ko01210,ko01230,ko01240
mws0036	609.18	301.09	610.19	C28H34O15	[M-H]-	Hesperetin-7-O-rutinoside (Hesperidin)*	橙皮素-7-O-芸香糖苷 (橙皮苷)*	Flavonoids	黄酮	Flavanones	二氢黄酮	520-26-3	3	3933.82	110499	10707.3	18573.6	11431.1	21644.2	5404.82	2.426e+06	24915	676724	544556	582635	C09755	-
pmb2640	199.17	199.17	200.178	C12H24O2	[M-H]-	Dodecanoic acid (Lauric acid)	十二烷酸(月桂酸)	Lipids	脂质	Free fatty acids	游离脂肪酸	143-07-7	3	122353	147300	171828	82785.6	91433.8	55440.7	68810.5	58806.7	61640.3	70742.5	84572.3	88132.1	C02679	ko00061,ko01100,ko01110
pmp000238	581.15	383.07	580.143	C26H28O15	[M+H]+	Luteolin-6-C-arabinoside-7-O-glucoside	木犀草素-6-C-阿拉伯糖苷-7-O-葡萄糖苷	Flavonoids	黄酮	Flavones	黄酮	-	3	3047.63	9	18122.7	65789.4	53498.6	6227.19	1351.52	9	5323.19	115829	126303	100577	-	-
pmf0348	187.13	97.06	188.141	C10H20O3	[M-H]-	2,6-Dimethyl-7-octene-2,3,6-triol	2,6-二甲基-7-辛烯-2,3,6-三醇	Others	其它类	Saccharides	糖类	73815-21-1	3	62743.3	51255.3	73129.2	61015.7	41708	34430	33118.8	37708.8	27007.3	47504.2	41277.8	51875.3	-	-
Lskp211409	497.31	335.26	496.304	C27H44O8	[M+H]+	Ergosta-5,24(28)-diene-3,20,26-triol (Podecdysone C)	麦角甾烷-5,24(28)-二烯-3,20,26-三醇 (罗汉松甾酮 C)	Steroids	甾体	Steroid	甾体	19458-46-9	3	5642.75	4821.34	8736	3790.06	2530.28	1840.55	5099.75	1935.54	982.822	12843.5	15848.4	13420.3	C16500	-
Lmhp011388	353.27	261.22	352.261	C21H36O4	[M+H]+	2-α-Linolenoyl-glycerol*	2-α-亚麻酸甘油酯*	Lipids	脂质	Glycerol ester	甘油酯	55268-58-1	1	78549.3	43440.5	25870	51299	45246.1	45943.9	24183.8	19491.7	12468.3	46212.6	36956.9	43881.9	-	-
pme0490	124.04	78.03	123.032	C6H5NO2	[M+H]+	Nicotinic acid (Vitamin B3)	烟酸 (维生素 B3)	Others	其它类	Vitamin	维生素	59-67-6	3	271599	262109	199478	237750	162563	114411	62259.2	88917.5	61373.1	123252	113571	141911	C00253	ko00760,ko00960,ko01100,ko01110,ko01240
Lmnp102682	595.17	463.13	594.159	C27H30O15	[M+H]+	Hispidulin-8-C-(2''-O-xylosyl)glucoside	高车前素-8-C-(2''-O-木糖基)葡萄糖苷	Flavonoids	黄酮	Flavones	黄酮	-	3	88646.4	69169.7	97130.7	3.09384e+06	3.77378e+06	329574	22796.6	270469	17279.2	428782	444793	356835	-	-
MWSmce165	165.08	59.02	166.084	C6H14O5	[M-H]-	L-Fucitol	L-岩藻糖醇	Others	其它类	Saccharides	糖类	13074-06-1	3	18410.5	53133.2	119251	91789	102192	80490.1	67675.2	155207	47377.9	61266.9	58121.8	72043.6	-	-
mws0043	403.14	373.1	402.132	C21H22O8	[M+H]+	Nobiletin (5,6,7,8,3',4'-Hexamethoxyflavone)	川陈皮素 (5,6,7,8,3',4'-六甲氧基黄酮)	Flavonoids	黄酮	Flavones	黄酮	478-01-3	2	15627.3	88545	16158.7	57731.6	10460.9	48807	3827.15	124970	15918	39673.4	49831.1	46654.3	C10112	-
mws1429	223.13	161.1	224.141	C13H20O3	[M-H]-	Vomifoliol	催吐萝芙叶醇	Terpenoids	萜类	Monoterpenoids	倍萜	189351-15-3	3	18024	17752.5	61807.2	23518.4	24720.7	15096.9	40342.9	23357.9	21213.6	35150.1	33084.9	41155	C04166	-
Lsjp211240	123.05	80.05	122.048	C6H6N2O	[M+H]+	Nicotinamide	烟酰胺	Others	其它类	Vitamin	维生素	98-92-0	1	984120	707515	821599	574347	789417	315411	489757	442341	294763	768866	969220	879622	C00153	ko00760,ko01100,ko01240
Zmyn000453	191.02	111.01	192.027	C6H8O7	[M-H]-	Isocitric Acid	异柠檬酸	Organic acids	有机酸	Organic acids	有机酸	320-77-4	1	1.91567e+07	2.37082e+07	5.2761e+07	7.08733e+06	1.27814e+07	1.04996e+07	6.13908e+07	1.60415e+07	1.98812e+07	2.26599e+07	2.8148e+07	2.39087e+07	C00311	ko00020,ko00630,ko01100,ko01110,ko01200,ko01210,ko01230,ko01240
Lmhp008885	440.28	299.26	439.27	C20H42NO7P	[M+H]+	LysoPE 15:0(2n isomer)*	溶血磷脂酰乙醇胺 15:0(2n异构)*	Lipids	脂质	LPE	溶血磷脂酰乙醇胺	-	1	228610	302071	262594	405042	836200	513906	1.61696e+06	503994	1.01028e+06	494813	624498	570127	-	-
Lmmp003109	305.1	139.04	304.095	C16H16O6	[M+H]+	3'-O-Methyl-epicatechin	3'-甲氧基-表儿茶素	Flavonoids	黄酮	Flavanols	黄烷醇类	76549-34-3	1	407346	623552	115582	1.86186e+06	2.07466e+06	1.6087e+06	626545	708446	409696	529858	517624	425890	-	-
pmn001695	371.1	249.06	372.106	C16H20O10	[M-H]-	Trihydroxycinnamoylquinic acid	三羟基肉桂酰奎宁酸	Phenolic acids	酚酸类	Phenolic acids	酚酸类	-	1	6.59246e+06	4.23567e+06	4751.43	2.85011e+06	4.63956e+06	2.40786e+06	9	758530	781117	1.07904e+06	1.29572e+06	1.35211e+06	-	-
MWSmce609	134.04	74.02	133.037	C4H7NO4	[M+H]+	L-Aspartic acid	L-天冬氨酸	Amino acids and derivatives	氨基酸及其衍生物	Amino acids and derivatives	氨基酸及其衍生物	56-84-8	2	1.32208e+06	997596	898676	1.13235e+06	1.91108e+06	1.10763e+06	1.21514e+06	2.35633e+06	1.02457e+06	2.35737e+06	1.8704e+06	2.07572e+06	C00049	ko00220,ko00250,ko00260,ko00261,ko00270,ko00300,ko00340,ko00410,ko00460,ko00470,ko00710,ko00760,ko00770,ko00970,ko00999,ko01100,ko01110,ko01200,ko01210,ko01230,ko01240,ko02010
mws1593	665.21	161.04	666.222	C24H42O21	[M-H]-	D-Maltotetraose	D-麦芽四糖	Others	其它类	Saccharides	糖类	34612-38-9	2	371653	448758	560727	541023	684551	1.02287e+06	811969	631600	523539	512375	409261	440699	C02052	-
pmp000001	301.07	286.05	300.063	C16H12O6	[M+H]+	Hispidulin (5,7,4'-Trihydroxy-6-methoxyflavone)*	高车前素*	Flavonoids	黄酮	Flavones	黄酮	1447-88-7	3	21305.7	55082.1	15546.1	45982.7	33493.5	36485.2	13421.8	119294	14700	91941.7	77547.2	74112.9	C10058	-
MWS4471	173.06	58.03	174.064	C6H10N2O4	[M-H]-	N-Alpha-Acetyl-L-Asparagine	N-α-乙酰基-L-天冬酰胺	Amino acids and derivatives	氨基酸及其衍生物	Amino acids and derivatives	氨基酸及其衍生物	4033-40-3	3	15763.6	2314.35	5064.62	3248.89	32100.8	5260.68	55670.7	6588.64	534.467	45399.1	38370.7	48377.6	-	-
Wagp010987	389.12	359.08	388.116	C20H20O8	[M+H]+	5-Hydroxy-3,7,8,3',4'-Pentamethoxyflavone*	5-羟基-3,7,8,3',4'-五甲氧基黄酮*	Flavonoids	黄酮	Flavones	黄酮	-	1	12805	56421.3	3936.14	71160.5	4646.12	27993.3	1905.19	104148	17265.2	24414.4	30842.5	27394.8	-	-
NK10264324	127.04	81.03	126.032	C6H6O3	[M+H]+	Phloroglucinol; 1,3,5-Benzenetriol	间苯三酚	Phenolic acids	酚酸类	Phenolic acids	酚酸类	108-73-6	2	247840	276978	313179	328638	254753	116104	326936	403628	567568	690732	790668	627649	C02183	-
Hmmp006067	798.5	439.36	780.466	C42H68O13	[M+NH4]+	Oleanolic acid-3-O-glucosyl(1→2)glucoside	齐墩果酸-3-O-葡萄糖基(1→2)葡萄糖苷	Terpenoids	萜类	Triterpene Saponin	三萜皂苷	-	2	593648	255368	341131	349276	299789	144671	133845	170203	465938	355508	365564	292653	-	-
Lmbn001981	137.02	93.03	138.032	C7H6O3	[M-H]-	2,5-Dihydroxybenzaldehyde	2,5-二羟基苯甲醛	Phenolic acids	酚酸类	Phenolic acids	酚酸类	1194-98-5	3	488619	418213	581584	434592	531035	328510	292078	365292	191604	481492	521919	604962	C05585	ko00350,ko01100
MWSmce096	219.17	81.07	218.167	C15H22O	[M+H]+	Nootkatone	圆柚酮	Terpenoids	萜类	Sesquiterpenoids	倍半萜	4674-50-4	1	1.9036e+06	1.43301e+06	1.95025e+06	678854	615392	224327	178163	212520	184406	521107	635452	522199	C17914	-
Lmmp003672	593.17	441.11	592.158	C31H28O12	[M+H]+	8,8'-Methylenebiscatechin	8,8'-亚甲基双儿茶素	Flavonoids	黄酮	Flavanols	黄烷醇类	81555-08-0	2	156074	497223	34595.4	372464	209560	322804	229705	156817	160926	187185	166793	147848	-	-
Zmdp002216	261.14	86.1	260.137	C11H20N2O5	[M+H]+	L-γ-Glutamyl-L-leucine	L-γ-谷氨酰胺-L-亮氨酸	Amino acids and derivatives	氨基酸及其衍生物	Amino acids and derivatives	氨基酸及其衍生物	2566-39-4	1	340863	43942.6	172771	332642	713731	85723.7	61489.8	44226.6	19782.7	229704	226733	184546	-	-
Lskp211268	179.07	119.05	178.063	C10H10O3	[M+H]+	3-Ethyl-7-hydroxyphthslide	3-Ethyl-7-hydroxyphthslide	Others	其它类	Others	其它	-	3	463688	612013	288692	289458	249676	280307	192870	179327	218143	309392	297645	369389	-	-
Wafn002827	357.12	195.07	358.126	C16H22O9	[M-H]-	Dihydroferulic acid glucoside	二氢阿魏酸 葡萄糖苷	Phenolic acids	酚酸类	Phenolic acids	酚酸类	-	1	2.15367e+06	1.06686e+06	530872	945488	2.11912e+06	2.17665e+06	1.30966e+06	254608	713770	648242	815399	699962	-	-
Lmfp001509	317.09	153.02	316.079	C13H16O9	[M+H]+	1-O-Galloyl-rhamnose	1-O-没食子酰-鼠李糖	Phenolic acids	酚酸类	Phenolic acids	酚酸类	-	3	130114	58423.3	72067.9	33037.1	58534.3	35672.1	25285.7	16598	16866.9	63388.7	75857	61134.9	-	-
Lmzn006795	453.34	453.34	454.345	C30H46O3	[M-H]-	3-Oxours-12-en-28-oic acid (Ursonic acid)	3-氧代熊果-12-烯-28-酸 (熊果酮酸)	Terpenoids	萜类	Triterpene	三萜	6246-46-4	3	275161	86030.1	175961	382004	395673	94147.2	58413	40461.9	82993.3	155221	124590	153429	-	-
Lmhp008763	452.28	311.26	451.27	C21H42NO7P	[M+H]+	LysoPE 16:1(2n isomer)*	溶血磷脂酰乙醇胺 16:1(2n异构)*	Lipids	脂质	LPE	溶血磷脂酰乙醇胺	-	1	223289	83121	117601	471399	188566	115566	55137.2	81265.9	44399	196994	239318	194902	-	-
Zjxp110301	295.23	151.11	294.219	C18H30O3	[M+H]+	3-Hydroxy-3,7,11-trimethyldodeca-1,6E,10-trien-9-yl isobutyrate	3-Hydroxy-3,7,11-trimethyldodeca-1,6E,10-trien-9-yl isobutyrate	Terpenoids	萜类	Sesquiterpenoids	倍半萜	-	3	49488.4	83754	79731.5	297079	59220.2	44137.2	31995	64026.4	60357	75290.8	95705.2	87089.2	-	-
Zjrn080662	841.5	781.47	842.503	C44H74O15	[M-H]-	Yesanchinoside D	野山茶苷 D	Terpenoids	萜类	Triterpene Saponin	三萜皂苷	-	2	6915.42	34824	36577.4	24134.2	23181.1	24747	38427.3	32075.7	25583.2	60055.5	61917.3	74403.7	-	-
mws0473	131.03	87.05	132.042	C5H8O4	[M-H]-	2-Methylsuccinic acid*	2-甲基丁二酸*	Organic acids	有机酸	Organic acids	有机酸	498-21-5	3	444248	226923	785612	366488	225813	390227	223569	353973	400799	315958	391455	392416	-	-
pmp001284	331.28	313.27	330.277	C19H38O4	[M+H]+	Monopalmitin	单棕榈酸甘油酯	Lipids	脂质	Glycerol ester	甘油酯	542-44-9	1	644859	705090	852247	541928	744123	561241	666724	588671	573031	599429	552748	471388	-	-
Lmhp009464	466.29	325.27	465.286	C22H44NO7P	[M+H]+	LysoPE 17:1(2n isomer)	溶血磷脂酰乙醇胺 17:1(2n异构)	Lipids	脂质	LPE	溶血磷脂酰乙醇胺	-	1	496420	98552.4	161049	1.72262e+06	288879	156604	204061	129273	196518	358160	432360	349504	-	-
Lmhp008440	438.26	297.24	437.254	C20H40NO7P	[M+H]+	LysoPE 15:1*	溶血磷脂酰乙醇胺 15:1*	Lipids	脂质	LPE	溶血磷脂酰乙醇胺	-	2	35489	40725.4	45763	69142.1	153972	84831.3	331305	94085	310832	91570.4	116076	109822	-	-
pmd0132	496.34	184.07	495.332	C24H50NO7P	[M+H]+	LysoPC 16:0(2n isomer)	溶血磷脂酰胆碱 16:0(2n异构)	Lipids	脂质	LPC	溶血磷脂酰胆碱	-	1	1.38945e+07	1.22872e+07	9.34407e+06	3.434e+07	5.80453e+07	4.22786e+07	5.76601e+07	5.4644e+07	4.61936e+07	3.15441e+07	3.74245e+07	2.98521e+07	-	-
Lhmp100903	779.46	423.36	778.45	C42H66O13	[M+H]+	Dehydroxysoyasaponin E glucuronic acid glucoside	脱氧大豆皂苷元E葡萄糖醛酸葡萄糖苷	Terpenoids	萜类	Triterpene Saponin	三萜皂苷	-	2	447350	457417	569408	212029	416841	227101	261658	236453	186511	198433	244908	248151	-	-
Lmmn002260	551.21	389.17	552.221	C27H36O12	[M-H]-	5'-Methoxyisolariciresinol-9'-O-glucoside	5'-甲氧基异落叶松脂醇-9'-O-葡萄糖苷	Lignans and Coumarins	木脂素和香豆素	Lignans	木脂素	-	2	266581	201429	230007	133375	203371	131152	46504.3	80122.9	117071	158823	186686	202331	-	-
pmb0578	655.17	207	654.159	C32H30O15	[M+H]+	Luteolin-7-O-(6''-sinapoyl)glucoside	木犀草素-7-O-(6''-芥子酰)葡萄糖苷	Flavonoids	黄酮	Flavones	黄酮	-	3	514266	89519.7	101447	60418.8	291444	84775.5	33235	26917.7	9815.09	222618	186504	178108	-	-
pma3101	256.08	124.04	256.082	C11H14NO6+	[M]+	Nicotinate D-ribonucleoside	烟酸核糖核苷	Others	其它类	Vitamin	维生素	17720-18-2	3	8.83055e+06	1.40551e+07	6.16832e+06	6.27119e+06	7.26052e+06	6.79496e+06	4.7196e+06	4.51471e+06	5.15374e+06	4.49734e+06	5.73646e+06	5.22722e+06	C05841	ko00760,ko01100
mws0275	133.01	71.01	134.022	C4H6O5	[M-H]-	L-Malic acid	L-苹果酸	Organic acids	有机酸	Organic acids	有机酸	97-67-6	3	2.02678e+07	3.17513e+07	5.35686e+07	1.52668e+07	4.2386e+07	1.38206e+07	6.2692e+07	1.76589e+07	2.41272e+07	2.80668e+07	3.22848e+07	3.58037e+07	C00149	ko00020,ko00620,ko00630,ko00710,ko01100,ko01110,ko01200
MWS201442	267.13	120.08	266.127	C13H18N2O4	[M+H]+	Phe-Thr	L-苯丙氨酸-L-苏氨酸	Amino acids and derivatives	氨基酸及其衍生物	Amino acids and derivatives	氨基酸及其衍生物	51352-44-4	3	188607	138618	169259	234579	161113	140798	135394	155638	118506	226588	288097	250615	-	-
pmp000268	487.34	405.31	486.334	C30H46O5	[M+H]+	2-Hydroxymethyl-A(1)-nor-19,24-dihydroxyurs-2,12-dien-28-oic acid (Rosamultic acid)	2-羟基甲基-A(1)-去甲基-19,24-二羟基熊果-2,12-二烯-28-酸 (野蔷薇酸)	Terpenoids	萜类	Triterpene	三萜	214285-76-4	2	106841	85881.3	47961.8	46984.6	46258.5	9843.62	12464.9	18079.4	17084.4	46125.1	58921.6	53484.1	-	-
pme3732	244.09	112.05	243.085	C9H13N3O5	[M+H]+	Cytidine	胞苷	Nucleotides and derivatives	核苷酸及其衍生物	Nucleotides and derivatives	核苷酸及其衍生物	65-46-3	3	956776	419268	763002	1.15117e+06	1.39005e+06	1.46855e+06	966527	883663	1.11781e+06	817851	1.02983e+06	1.00398e+06	C00475	ko00240,ko01100,ko01232,ko02010
pme3033	104.07	58.07	103.063	C4H9NO2	[M+H]+	N,N-Dimethylglycine	N,N-二甲基甘氨酸	Amino acids and derivatives	氨基酸及其衍生物	Amino acids and derivatives	氨基酸及其衍生物	1118-68-9	2	3.97864e+06	3.07267e+06	3.99176e+06	2.97184e+06	3.73239e+06	2.42465e+06	3.30529e+06	2.70805e+06	3.79284e+06	3.12058e+06	3.87811e+06	3.8936e+06	C01026	ko00260,ko01100
Lmhp009034	452.28	311.26	451.27	C21H42NO7P	[M+H]+	LysoPE 16:1*	溶血磷脂酰乙醇胺 16:1*	Lipids	脂质	LPE	溶血磷脂酰乙醇胺	-	1	40934.9	72100.5	71408.7	82580.3	194596	117215	416706	132756	254997	113392	139821	114467	-	-
Lhhp102904	357.13	307.09	356.126	C20H20O6	[M+H]+	Horsfieldin	Horsfieldin	Lignans and Coumarins	木脂素和香豆素	Lignans	木脂素	-	3	127389	31582.1	151759	154967	57596.8	68256	61636.6	119008	66315.6	118243	142879	114647	-	-
pme3005	74.06	46.03	73.0528	C3H7NO	[M+H]+	N,N-Dimethylformamide	N,N-二甲基甲酰胺	Alkaloids	生物碱	Alkaloids	生物碱	68-12-2	3	696063	664242	929341	1.02527e+06	889764	880731	479064	582090	684461	728077	571005	685102	C03134	-
Hmcn000192	209.07	59.01	210.074	C7H14O7	[M-H]-	Sedoheptulose	景天庚酮糖	Others	其它类	Saccharides	糖类	3019-74-7	3	135382	248943	371725	281791	315206	294185	73108.3	424528	118935	85555.4	91372.1	71573.2	C02076	ko00710,ko01100
zjbp111026	343.15	163.07	342.147	C20H22O5	[M+H]+	tetrahydrochromone M	tetrahydrochromone M	Others	其它类	Others	其它	-	3	25450.2	37072.2	29751.4	25439.6	23705.8	20150.5	23608.9	23105.1	25096.1	22104.5	28330.1	26193.7	-	-
pme3184	332.08	136.06	331.068	C10H14N5O6P	[M+H]+	2'-Deoxyadenosine-5'-monophosphate	2'-脱氧腺苷-5'-单磷酸	Nucleotides and derivatives	核苷酸及其衍生物	Nucleotides and derivatives	核苷酸及其衍生物	653-63-4	3	523057	79700.7	94087.1	155523	79810.5	91015.5	53727.2	53296.2	71650.3	76754.2	97829.7	83960.9	C00360	ko00230,ko01100,ko01232
pme2380	145.01	101.02	146.022	C5H6O5	[M-H]-	α-Ketoglutaric acid	α-酮戊二酸	Organic acids	有机酸	Organic acids	有机酸	328-50-7	3	400820	953588	899596	1.53223e+06	1.14936e+06	1.1048e+06	876745	1.00833e+06	1.19341e+06	287059	362392	355670	C00026	ko00020,ko00040,ko00053,ko00220,ko00250,ko00300,ko00310,ko00340,ko00430,ko00470,ko00630,ko00650,ko00660,ko01100,ko01110,ko01200,ko01210,ko01230,ko01240
Zjmp102704	457.33	187.15	456.324	C29H44O4	[M+H]+	3,24-Dihydroxy-30-norolean-12,20(29)-dien-28-oic acid (Quinatic acid)	3,24-二羟基-30-去甲基齐墩果-12,20(29)-二烯-28-酸 (木通酸)	Terpenoids	萜类	Triterpene	三萜	119863-89-7	2	49732.6	28335.9	12699.3	306293	8420.98	6029.12	9820.39	9610.75	9505.63	40401	48915.1	39103.4	-	-
Lmbn001467	158.08	116.07	159.089	C7H13NO3	[M-H]-	5-Acetamidopentanoic Acid	5-乙酰氨基戊酸	Organic acids	有机酸	Organic acids	有机酸	1072-10-2	3	782373	392018	906263	345679	518460	397911	208499	208892	219978	213637	274720	252999	C03087	ko00310,ko01100
MWS201458	279.17	120.09	278.163	C15H22N2O3	[M+H]+	Phe-Ile	L-苯丙氨酸-L-异亮氨酸	Amino acids and derivatives	氨基酸及其衍生物	Amino acids and derivatives	氨基酸及其衍生物	22951-94-6	3	90169.2	57313.5	54825	153766	55005.4	60913.2	50852.2	82933	58971	169994	145894	133058	-	-
Zmhn001446	579.21	417.16	580.216	C28H36O13	[M-H]-	Syringaresinol-4'-O-glucoside*	丁香树脂酚-4'-O-葡萄糖苷*	Lignans and Coumarins	木脂素和香豆素	Lignans	木脂素	7374-79-0	1	396762	316899	805038	248384	1.18098e+06	328901	108742	119856	243689	272445	345411	337399	C10890	-
Wbmn009553	569.34	487.34	570.356	C34H50O7	[M-H]-	2,3-Diacetoxy-18-hydroxyoleana-5,12-dien-28-oic acid(ISO-2)	2,3-二乙酰氧基-18-羟基齐墩果烷-5,12-二烯-28-酸(ISO-2)	Terpenoids	萜类	Triterpene	三萜	-	2	51009.8	59551	33615.3	920919	58676.7	27922.8	13810.4	4543.58	8788.71	175792	142929	182065	-	-
HJN087	433.12	271.06	434.121	C21H22O10	[M-H]-	Naringenin-4'-O-glucoside	柚皮素-4'-O-葡萄糖苷	Flavonoids	黄酮	Flavanones	二氢黄酮	-	3	29065.3	9763.81	23696.5	31260.5	24629.6	23915.1	12683.8	23264.2	15977.3	17339.5	21979.2	18430.7	-	-
pmb2791	309.21	209.05	310.214	C18H30O4	[M-H]-	9-Hydroperoxy-10E,12,15Z-octadecatrienoic acid	9-羟基过氧-10E,12,15Z-十八碳三烯酸	Lipids	脂质	Free fatty acids	游离脂肪酸	111004-08-1	3	6516.22	8004.5	8930.48	7981.6	7024.4	8286.94	10119.5	9222.39	8700.26	7024.47	7722.97	8993.1	C16321	ko00592,ko01110
Lhwp111002	1135.56	325.11	1134.55	C54H86O25	[M+H]+	Vaccaroside A	Vaccaroside A	Terpenoids	萜类	Triterpene Saponin	三萜皂苷	-	3	28784.5	23757.9	24464.6	33222.5	41023.3	23697.1	13690.2	25718.4	23231	62425.4	49357.9	52045	-	-
mws0048	431.1	311.05	432.106	C21H20O10	[M-H]-	Apigenin-8-C-Glucoside (Vitexin)*	芹菜素-8-C-葡萄糖苷 (牡荆素)*	Flavonoids	黄酮	Flavones	黄酮	3681-93-4	3	35366.2	71079.2	27892	432868	159454	59574.3	18427.4	26023.6	13693.8	72182.6	92724	87118.9	C01460	ko00941,ko00944
ML10174588	233.16	233.16	234.162	C15H22O2	[M-H]-	Confertifoline	密叶辛木素	Terpenoids	萜类	Sesquiterpenoids	倍半萜	1811-23-0	2	432715	688058	687141	768582	560576	496876	576937	557067	560029	460181	593805	533816	C09376	-
pme1654	209.12	59.02	210.126	C12H18O3	[M-H]-	Jasmonic acid	茉莉酸	Organic acids	有机酸	Organic acids	有机酸	77026-92-7	3	33663.9	8753.77	24355.6	9422.96	11837.3	31423.2	10984.3	8280.71	4469.25	16393.2	14758.4	18965.8	C08491	ko00592,ko01100,ko01110,ko04075
Hmbn002692	517.16	175.04	518.164	C22H30O14	[M-H]-	6'-O-Feruloyl-D-sucrose	6'-O-阿魏酰-D-蔗糖	Phenolic acids	酚酸类	Phenolic acids	酚酸类	118230-77-6	2	1.30295e+06	632839	42282.2	47320.4	186051	70994.6	37451.2	16958.7	142975	310683	353400	400799	-	-
Lshp211002	359.13	179.07	358.126	C16H22O9	[M+H]+	Sweroside	獐牙菜苷	Terpenoids	萜类	Monoterpenoids	倍萜	14215-86-2	2	230929	22714.4	247172	152828	225265	163089	146721	99509.1	134143	67663.8	85952.8	84092.7	C17071	-
Zmyn005252	285.24	239.24	286.251	C17H34O3	[M-H]-	3-Hydroxy-palmitic acid methyl ester	3-羟基-棕榈酸甲酯	Lipids	脂质	Free fatty acids	游离脂肪酸	51883-36-4	1	140847	120897	226236	60944.3	100144	59619	27156.4	32792.3	27306.4	84934.2	108534	104488	C11849	-
HJAP112	491.11	303.06	490.111	C23H22O12	[M+H]+	Quercetin-3-O-(2''-O-acetyl)rhamnoside	槲皮素-3-O-(2''-O-乙酰)鼠李糖苷	Flavonoids	黄酮	Flavonols	黄酮醇	-	3	3471.28	7491.28	8581.77	41414.3	15113.8	32112.7	13767.4	34482.6	18497.8	19644.1	18744.2	15323.7	-	-
pmb0382	339.09	177.05	338.079	C19H14O6	[M+H]+	O-Feruloyl 4-hydroxycoumarin	阿魏酰 4-羟基香豆素	Lignans and Coumarins	木脂素和香豆素	Coumarins	香豆素	-	2	4.00562e+06	1.54016e+06	341567	562854	745421	382397	376032	335417	387037	2.74696e+06	2.19142e+06	2.76888e+06	-	-
pmb0864	426.26	285.24	425.254	C19H40NO7P	[M+H]+	LysoPE 14:0*	溶血磷脂酰乙醇胺 14:0*	Lipids	脂质	LPE	溶血磷脂酰乙醇胺	-	2	47608.5	57782.4	49266.5	87731.9	155803	84919	334409	157699	192458	122424	134181	103823	-	-
Lhmp102844	219.18	159.12	218.167	C15H22O	[M+H]+	1-Cis-5-cis-germacrone	1-cis-5-cis-大牻牛儿酮	Terpenoids	萜类	Sesquiterpenoids	倍半萜	-	2	60225.5	43078.3	86257.3	43025.8	53730.3	17789	17222.3	22010.5	24953.7	23855.8	28464.4	22374.9	-	-
pmp001111	579.17	561.16	578.164	C27H30O14	[M+H]+	Violanthin	三色堇黄酮苷	Flavonoids	黄酮	Flavones	黄酮	40581-17-7	2	61685.4	232259	18291.2	114643	53593.5	86017.6	125316	43493.7	49669.3	69720.2	87616.1	71873.7	C10196	-
Hmgp002036	479.12	317.06	478.111	C22H22O12	[M+H]+	Nepetin-7-O-glucoside(Nepitrin)	泽兰黄酮-7-O-葡萄糖苷(假荆芥属苷)	Flavonoids	黄酮	Flavones	黄酮	569-90-4	1	503290	659043	366931	1.47953e+06	3.76838e+06	2.324e+06	258270	369550	322458	228622	252641	294080	-	-
Qmkp093004	146.06	91.05	145.053	C9H7NO	[M+H]+	Indole-3-carboxaldehyde	吲哚-3-甲醛	Alkaloids	生物碱	Plumerane	吲哚类生物碱	487-89-8	1	913854	1.18484e+06	145720	328579	2.46932e+06	427981	993028	174445	156787	693664	645453	537162	C08493	-
pma2088	627.16	465	626.148	C27H30O17	[M+H]+	Quercetin-3,4'-O-di-glucoside	槲皮素-3,4'-O-二葡萄糖苷	Flavonoids	黄酮	Flavonols	黄酮醇	29125-80-2	3	24717.1	12822.8	132456	26990.5	24700.7	24673.4	4875.91	27751.8	12887.6	29031.1	30463.3	23707.5	-	-
Lmhp002001	265.15	72.08	264.147	C14H20N2O3	[M+H]+	L-Valyl-L-Phenylalanine	L-缬氨酰-L-苯丙氨酸	Amino acids and derivatives	氨基酸及其衍生物	Amino acids and derivatives	氨基酸及其衍生物	3918-92-1	3	318319	170272	251474	694528	439630	704552	312097	337545	440764	644301	726923	561241	-	-
mws0024	169.01	125.02	170.022	C7H6O5	[M-H]-	Gallic acid	没食子酸	Phenolic acids	酚酸类	Phenolic acids	酚酸类	149-91-7	3	82499.5	109457	76203.9	249011	191428	131292	125190	115223	78350.7	101859	130055	126588	C01424	ko00999
pmn001420	341.09	179.04	342.095	C15H18O9	[M-H]-	1-O-Caffeoyl-β-D-glucose	1-O-咖啡酰-β-D-葡萄糖	Phenolic acids	酚酸类	Phenolic acids	酚酸类	14364-08-0	3	906279	444599	260535	313196	183264	139682	93215.5	93813.6	75329.1	253542	310251	326225	C10433	-
Cmsp003083	521.2	131.05	520.194	C26H32O11	[M+H]+	Dehydrodiconiferyl alcohol-4-O-glucoside	脱氢二十二烷醇-4-O-葡萄糖苷	Lignans and Coumarins	木脂素和香豆素	Lignans	木脂素	107870-88-2	1	9.24693e+06	3.34543e+06	2.45808e+06	501749	1.12201e+06	435001	523980	298727	141064	2.53712e+06	3.28915e+06	3.02036e+06	-	-
Wagp010678	389.12	359.08	388.116	C20H20O8	[M+H]+	5-Hydroxy-3,3',4',5',7-Pentamethoxyflavone*	5-羟基-3,3',4',5',7-五甲氧基黄酮*	Flavonoids	黄酮	Flavones	黄酮	5084-19-5	1	12015.7	53782.7	3755.07	84506.7	5549.23	22187	1583.78	109317	16053.3	27242.1	32589	25518.7	-	-
pme3034	131.03	87.05	132.042	C5H8O4	[M-H]-	Ethylmalonic acid*	乙基丙二酸*	Organic acids	有机酸	Organic acids	有机酸	601-75-2	3	25688.4	23623.7	34567.5	22084.8	22029	16129.6	31339.7	19964.3	19550.2	24628.2	29799.9	31903.6	-	-
Lskp211460	439.36	203.18	438.35	C30H46O2	[M+H]+	Olean-12-ene-3,16-dione (Maniladione)(ISO1)	齐墩果-12-烯-3,16-二酮 (Maniladione)(ISO1)	Terpenoids	萜类	Triterpene	三萜	-	1	2.31117e+06	1.48908e+06	1.79458e+06	1.31445e+06	1.85714e+06	1.94812e+06	1.37934e+06	1.58021e+06	2.67955e+06	1.75031e+06	2.11368e+06	1.66047e+06	-	-
pmb0530	664.12	136.06	663.109	C21H27N7O14P2	[M+H]+	Nicotinic acid adenine dinucleotide	烟酸腺嘌呤二核苷酸	Nucleotides and derivatives	核苷酸及其衍生物	Nucleotides and derivatives	核苷酸及其衍生物	53-84-9	3	79883.7	36183.7	62645.3	70549.2	82901.2	66835.8	75382.6	50449.3	40458.3	98709.7	81167.3	105110	C00003	ko00190,ko00730,ko00760,ko01100,ko01240
pme2890	269.06	136.04	268.055	C8H16N2O4S2	[M+H]+	L-Homocystine	L-高胱氨酸	Amino acids and derivatives	氨基酸及其衍生物	Amino acids and derivatives	氨基酸及其衍生物	626-72-2	3	74172.5	36853.5	58410.2	192717	94051.2	70329.6	42306.8	75617.4	64431.2	57950.6	55703.2	45024.5	C01817	ko00270
Zmhn002301	325.09	163.04	326.1	C15H18O8	[M-H]-	p-Coumaric acid-4-O-glucoside	对香豆酸-4-O-葡萄糖苷	Phenolic acids	酚酸类	Phenolic acids	酚酸类	117405-48-8	3	122501	66083	117542	69082.9	106180	64752.5	62625	43403.9	38818	94183.9	93036.5	73912	C06739	-
pmb0624	611.16	431.1	610.153	C27H30O16	[M+H]+	Isoorientin-7-O-glucoside	异荭草素-7-O-葡萄糖苷	Flavonoids	黄酮	Flavones	黄酮	-	2	224664	169488	131309	164362	166566	119139	62794.2	42816	31759	80773.5	85029.9	65794.7	-	-
MWS5231	243.16	181.16	244.167	C13H24O4	[M-H]-	Tridecanedioic acid	十三碳二酸	Lipids	脂质	Free fatty acids	游离脂肪酸	505-52-2	1	30493.8	43654.1	44968.6	41176.8	51852.3	47549.3	48008.4	34620.5	34877.7	28822	35777.2	37126.7	-	-
Lmqp008286	489.36	407.33	488.35	C30H48O5	[M+H]+	2,3,23-Trihydroxyolean-12-en-28-oic acid (Arjunolic acid)	2,3,23-三羟基齐墩果-12-烯-28-酸 (Arjunolic acid)	Terpenoids	萜类	Triterpene	三萜	465-00-9	2	48745.5	15572.2	38203.5	26430.9	25790.1	4654.48	3461.37	8387.4	4879.67	23018.7	18699.3	24204.2	-	-
Zmyn000230	147.03	57.03	148.037	C5H8O5	[M-H]-	2-Dehydro-3-deoxy-L-arabinonate	2-脱氢-3-脱氧-L-阿拉伯糖	Others	其它类	Saccharides	糖类	-	3	52833.3	65185.4	138272	80399.1	86133.9	66926	232869	68891.8	86244.5	64819.5	78435.3	61433.3	C00684	ko00053,ko01100
pme2776	253.09	137.05	252.086	C10H12N4O4	[M+H]+	2'-Deoxyinosine	2-脱氧肌苷	Nucleotides and derivatives	核苷酸及其衍生物	Nucleotides and derivatives	核苷酸及其衍生物	890-38-0	3	173017	56650.7	113786	99584.9	53901.8	56014.8	45245.2	74527.7	20533.5	85674.1	76974.6	99848.7	C05512	ko00230,ko01100,ko01232,ko02010
pme3337	384.12	252.07	383.108	C14H17N5O8	[M+H]+	Succinyladenosine	琥珀酰腺苷	Nucleotides and derivatives	核苷酸及其衍生物	Nucleotides and derivatives	核苷酸及其衍生物	4542-23-8	1	3.41711e+06	3.35346e+06	4.89779e+06	2.07847e+06	3.15821e+06	2.67826e+06	2.67372e+06	1.65021e+06	1.15067e+06	1.43914e+06	1.69433e+06	1.87825e+06	-	-
Zmdn001564	293.11	164.07	294.122	C14H18N2O5	[M-H]-	γ-Glutamylphenylalanine	γ-谷氨酰胺苯丙氨酸	Amino acids and derivatives	氨基酸及其衍生物	Amino acids and derivatives	氨基酸及其衍生物	7432-24-8	3	5461.75	3872.77	6304.04	3994.35	10909	5562.35	10544.3	5042.4	1687.25	18613.8	15770.6	20591.5	-	-
mws0921	149.06	131.05	150.068	C9H10O2	[M-H]-	p-Coumaryl alcohol	对香豆醇	Phenolic acids	酚酸类	Phenolic acids	酚酸类	3690-05-9	3	230255	57906.3	119368	122133	129648	39001.1	24252.5	50297.5	36103.9	90916.7	118663	108320	C02646	ko00940,ko01100,ko01110
Lskp211408	497.31	335.26	496.304	C27H44O8	[M+H]+	polypodin B	polypodin B	Steroids	甾体	Steroid	甾体	-	3	5113.3	4847.5	5940.06	6565.27	2995.99	6206.51	6126.55	4242.51	4937.97	9609.53	11895	9447.83	-	-
pme1086	306.08	143.05	307.084	C10H17N3O6S	[M-H]-	Glutathione reduced form	谷胱甘肽还原型	Amino acids and derivatives	氨基酸及其衍生物	Amino acids and derivatives	氨基酸及其衍生物	70-18-8	1	6281.87	3542.57	1333.64	1204.81	3154.46	729.922	1108.46	623.048	3822.02	38841.7	39139.5	30659.9	C00051	ko00270,ko00480,ko01100,ko01240,ko02010
Lmhp008233	474.26	333.24	473.254	C23H40NO7P	[M+H]+	LysoPE 18:4	溶血磷脂酰乙醇胺 18:4	Lipids	脂质	LPE	溶血磷脂酰乙醇胺	-	3	11467.4	2260.78	3847.8	12601.1	7262.44	8709.02	23149.8	8547.27	10290.9	17528	22500.7	18687.3	-	-
pmb2653	649.22	145.05	650.227	C24H42O20	[M-H]-	DMelezitose O-rhamnoside	松三糖 O-鼠李糖苷	Others	其它类	Saccharides	糖类	-	3	1.1619e+06	1.18002e+06	834884	476521	1.79051e+06	1.48216e+06	3.24689e+06	1.03087e+06	1.80921e+06	737849	964924	858827	-	-
Lmyn007622	331.25	157.12	332.256	C18H36O5	[M-H]-	9,10,18-Trihydroxystearic acid	9,10,18-三羟基硬脂酸	Lipids	脂质	Free fatty acids	游离脂肪酸	496-86-6	3	3331.12	10166.7	3677.5	4376.15	2909.72	3428.02	2742.01	4110.84	1086.34	4535.11	5370.63	4150.49	C19621	ko00073
Lskp211470	503.34	439.32	502.329	C30H46O6	[M+H]+	2,3,19-Trihydroxy-24-oxo-olean-12-en-28-oic acid	2,3,19-三羟基-24-氧代-齐墩果-12-烯-28-酸	Terpenoids	萜类	Triterpene	三萜	-	2	135241	135411	115833	373660	146562	36008	96353.9	134446	63966.7	158956	207962	185229	-	-
pmp001311	627.16	303.1	626.148	C27H30O17	[M+H]+	6-Hydroxykaempferol-7,6-O-Diglucoside	6-羟基山柰酚-7,6-O-二葡萄糖苷	Flavonoids	黄酮	Flavonols	黄酮醇	-	2	378758	214631	665911	108286	174244	132322	36715.9	50617.6	32860.2	191960	203165	156130	-	-
Lskp211411	497.31	335.26	496.304	C27H44O8	[M+H]+	abutasterone	abutasterone	Steroids	甾体	Steroid	甾体	88669-02-7	3	6503.11	6364.63	7487.53	4508.47	2668.09	2636.21	4002.19	1012.37	2134.07	12720.6	15296.3	11866.8	-	-
pme3188	323.03	211	324.036	C9H13N2O9P	[M-H]-	Uridine 5'-monophosphate	尿苷 5'-单磷酸	Nucleotides and derivatives	核苷酸及其衍生物	Nucleotides and derivatives	核苷酸及其衍生物	58-97-9	1	83424.4	126509	115743	279168	79580.3	297115	218304	189502	226454	142357	141189	177593	C00105	ko00240,ko01100,ko01232,ko01240
Lmhp009187	440.28	299.26	439.27	C20H42NO7P	[M+H]+	LysoPE 15:0*	溶血磷脂酰乙醇胺 15:0*	Lipids	脂质	LPE	溶血磷脂酰乙醇胺	-	1	224067	304673	279553	401876	901004	511027	1.76648e+06	492697	1.07415e+06	550022	659912	510898	-	-
pma0461	277.22	93.07	276.209	C18H28O2	[M+H]+	14,15-Dehydrocrepenynic acid	14,15-脱氢还阳参油酸	Lipids	脂质	Free fatty acids	游离脂肪酸	4154-44-3	3	6086.26	22333.9	25481.7	31727.4	10795.6	6394.01	7608.19	9034.49	15717.7	45699	35608.4	37576.7	-	-
pme2117	426.02	158.93	427.029	C10H15N5O10P2	[M-H]-	Adenosine 5'-diphosphate	腺苷-5'-二磷酸	Nucleotides and derivatives	核苷酸及其衍生物	Nucleotides and derivatives	核苷酸及其衍生物	58-64-0	3	62281.7	52383.2	76083.9	71701.4	44961.7	59926.3	94065.9	63542.2	48043.6	55357.1	72079.6	68675.6	C00008	ko00190,ko00195,ko00230,ko00908,ko01100,ko01110,ko01232,ko01240
MWSmce285	319.11	255.1	318.11	C17H18O6	[M+H]+	Agarotetrol	沉香四醇	Others	其它类	Saccharides	糖类	69809-22-9	3	3383.59	31969.8	26244.3	34457.1	29860.8	23184.1	31308.5	22163.9	23487.3	65638.1	71235.2	85085.8	-	-
Hayp001747	273.09	227.09	272.08	C14H12N2O4	[M+H]+	Dichotomine B	Dichotomine B	Alkaloids	生物碱	Alkaloids	生物碱	-	2	151390	49811.1	163248	101586	33012.2	13226.5	8980.83	17696.6	9064.85	115652	114728	90150.5	-	-
mws1668	187.04	131.05	186.032	C11H6O3	[M+H]+	Angelicin*	白芷素;异补骨脂内酯*	Lignans and Coumarins	木脂素和香豆素	Coumarins	香豆素	523-50-2	3	66553.3	189635	162408	83739.8	121960	16881.1	18258	42685.4	38913	51080.7	65846.8	54455	C09060	ko00999,ko01110
MWS4296	223.11	120.08	222.1	C11H14N2O3	[M+H]+	Glycylphenylalanine*	甘氨酰苯基丙氨酸*	Amino acids and derivatives	氨基酸及其衍生物	Amino acids and derivatives	氨基酸及其衍生物	3321-03-7	2	336121	201811	314194	658168	530832	450616	441136	523998	505843	516736	679381	609703	-	-
mws0376	115	71.01	116.011	C4H4O4	[M-H]-	Fumaric acid	延胡索酸(富马酸,反丁烯二酸)	Organic acids	有机酸	Organic acids	有机酸	110-17-8	3	308501	420849	719881	332402	587154	186142	910010	252735	353863	368123	450428	482220	C00122	ko00020,ko00190,ko00220,ko00250,ko00350,ko00360,ko00620,ko00650,ko00760,ko01100,ko01110,ko01200
Zasp102439	118.06	91.05	117.058	C8H7N	[M+H]+	m-Aminophenylacetylene	间氨基苯乙炔	Alkaloids	生物碱	Alkaloids	生物碱	54060-30-9	1	122154	141013	53466.4	73091.6	215493	83757	152876	60642.9	65831.7	78296.1	98658.6	78908.6	-	-
pme2923	117.02	75.01	118.027	C4H6O4	[M-H]-	Acetoxyacetic acid	乙酰氧基乙酸	Organic acids	有机酸	Organic acids	有机酸	13831-30-6	3	78132.4	58583.8	110484	80272	82763.8	53595.6	36155.7	49449.7	43039	21805.7	27427.1	28277.4	-	-
pmc0281	400.15	136.06	399.139	C15H21N5O8	[M+H]+	Ribosyladenosine	核糖腺苷	Nucleotides and derivatives	核苷酸及其衍生物	Nucleotides and derivatives	核苷酸及其衍生物	-	3	261090	66021.5	36280.5	81020.6	108548	43112	35472.8	64678.8	38962.8	74187.1	71002.1	91009.6	-	-
Lmhp010040	504.31	363.29	503.301	C25H46NO7P	[M+H]+	LysoPE 20:3*	溶血磷脂酰乙醇胺 20:3*	Lipids	脂质	LPE	溶血磷脂酰乙醇胺	-	3	44815.9	4706.04	12765	24681.1	4078.29	11191.4	13591.8	6305.4	3663.06	8921.16	11716.3	10955	-	-
Lmhp009802	504.31	363.29	503.301	C25H46NO7P	[M+H]+	LysoPE 20:3(2n isomer)*	溶血磷脂酰乙醇胺 20:3(2n异构)*	Lipids	脂质	LPE	溶血磷脂酰乙醇胺	-	3	44815.9	4706.04	12765	24681.1	4078.29	11191.4	13591.8	6305.4	3663.06	8921.16	11716.3	10955	-	-
Zbdp002392	167.03	123.04	166.027	C8H6O4	[M+H]+	Piperonylic acid	胡椒酸	Organic acids	有机酸	Organic acids	有机酸	94-53-1	2	116566	150396	280699	68874.7	124450	61691.9	266723	79655.1	132569	149712	197374	173910	-	-
Hmsp000364	144.1	98.09	143.095	C7H13NO2	[M+H]+	L-Cyclopentylglycine	环戊基甘氨酸	Amino acids and derivatives	氨基酸及其衍生物	Amino acids and derivatives	氨基酸及其衍生物	2521-84-8	3	168136	65962.7	461481	85874.6	101752	48071.5	37934.4	91262.2	50997.6	68048.9	73808.7	88511.5	-	-
Zmxp002867	625.17	301.07	624.169	C28H32O16	[M+H]+	Chrysoeriol-5,7-di-O-glucoside	金圣草黄素-5,7-二-O-葡萄糖苷	Flavonoids	黄酮	Flavones	黄酮	-	3	375757	270608	197534	143904	236485	106527	59387	93553.3	52194.7	152303	193933	155828	-	-
Lalp002963	523.2	163.08	522.194	C22H34O14	[M+H]+	Plantarenaloside glucoside	车前醚苷 葡萄糖苷	Terpenoids	萜类	Monoterpenoids	倍萜	-	2	547835	82561.6	667005	308700	425075	330997	251682	228174	412026	203784	154183	181287	-	-
pme2679	132.1	86.1	131.095	C6H13NO2	[M+H]+	L-Allo-isoleucine	L-别异亮氨酸	Amino acids and derivatives	氨基酸及其衍生物	Amino acids and derivatives	氨基酸及其衍生物	1509-34-8	3	5.10874e+06	4.65814e+06	1.65972e+06	2.53028e+06	1.64192e+07	2.59854e+06	2.29164e+07	2.06802e+06	2.77269e+06	9.89095e+06	8.44708e+06	7.52219e+06	C21096	-
ML10180524	244.09	112.05	243.085	C9H13N3O5	[M+H]+	Cytarabine	胞嘧啶阿拉伯糖苷	Nucleotides and derivatives	核苷酸及其衍生物	Nucleotides and derivatives	核苷酸及其衍生物	147-94-4	3	1.45129e+06	438121	800364	852014	1.3362e+06	825181	1.2266e+06	866388	1.13724e+06	1.00461e+06	1.27919e+06	1.02533e+06	C02961	-
Wagp001741	429.19	267.14	428.18	C19H28N2O9	[M+H]+	N-(gamma-L-glutamyl)tyramine O-glucoside	N-(γ-L-谷氨酰)酪胺 O-葡萄糖苷	Alkaloids	生物碱	Phenolamine	酚胺	-	2	169354	112751	143439	31711.7	64917.7	33832.4	15138.9	23163.8	23717.1	42859.3	54602.6	55565	-	-
Lmhp011549	550.39	184.07	549.379	C28H56NO7P	[M+H]+	LysoPC 20:1	溶血磷脂酰胆碱 20:1	Lipids	脂质	LPC	溶血磷脂酰胆碱	-	2	241922	108781	167601	179679	250000	159886	269485	90973.2	66348.8	216773	164585	184588	-	-
pmb2979	549.12	387.1	550.132	C25H26O14	[M-H]-	Hesperetin-7-O-(6''-malonyl)glucoside	橙皮素-7-O-(6''-丙二酰)葡萄糖苷	Flavonoids	黄酮	Flavanones	二氢黄酮	-	3	663971	697726	1.22755e+06	447317	1.02971e+06	408542	485437	513379	365277	462872	595473	597906	-	-
Lmqp000873	101.02	55.02	100.016	C4H4O3	[M+H]+	Succinic anhydride	琥珀酸酐	Organic acids	有机酸	Organic acids	有机酸	108-30-5	3	76176	169610	434757	417719	429828	457629	545476	354959	281714	379759	428965	501270	C19524	-
MWSslk257	324.06	112.05	323.052	C9H14N3O8P	[M+H]+	Cytidine 5'-monophosphate(Cytidylic acid)	胞苷-5'-单磷酸	Nucleotides and derivatives	核苷酸及其衍生物	Nucleotides and derivatives	核苷酸及其衍生物	63-37-6	3	43297.1	46774.3	60348.8	123095	151273	139581	65948.7	133309	131777	92351.6	114387	121872	C00055	ko00240,ko01100,ko01232
mws2212	179.03	135.05	180.042	C9H8O4	[M-H]-	Caffeic acid	咖啡酸	Phenolic acids	酚酸类	Phenolic acids	酚酸类	331-39-5	3	303564	137687	171061	228818	235972	148368	102259	103580	99037.8	166023	187015	140873	C01197	ko00940,ko01100,ko01110
Lmmn005003	1087.51	1087.5	1088.5	C52H80O24	[M-H]-	Medicagenic acid-3-O-glucuronide-28-O-xylosyl(1,4)-rhamnosyl(1,2)-arabinoside	苜蓿酸-3-O-葡萄糖醛酸苷-28-O-木糖基(1,4)-鼠李糖基(1,2)-阿拉伯糖苷	Terpenoids	萜类	Triterpene Saponin	三萜皂苷	128192-15-4	2	1.6981e+06	1.71279e+06	848618	447350	927557	684993	1.01942e+06	629830	1.36253e+06	1.15555e+06	1.44716e+06	1.52261e+06	-	-
pmb2406	510.36	184.07	509.348	C25H52NO7P	[M+H]+	LysoPC 17:0*	溶血磷脂酰胆碱 17:0*	Lipids	脂质	LPC	溶血磷脂酰胆碱	50930-23-9	1	528227	578531	376673	1.26865e+06	4.01259e+06	1.43811e+06	2.19565e+06	1.48434e+06	1.35786e+06	1.29997e+06	1.42292e+06	1.06982e+06	-	-
pme2596	184.06	148.04	183.053	C8H9NO4	[M+H]+	4-Pyridoxic acid	4-吡哆酸	Others	其它类	Vitamin	维生素	82-82-6	3	32204.2	14867	19641.9	59330.8	54617.9	11062.7	9580.72	15945.3	3364.33	10421.3	13041.4	13794	C00847	ko00750,ko01100
pme1730	117.02	73.03	118.027	C4H6O4	[M-H]-	D-Erythronolactone	D-赤酮酸内酯	Organic acids	有机酸	Organic acids	有机酸	15667-21-7	3	63290.3	68321.1	59401.2	57086.4	51555.5	62381.5	33187.9	39230.8	47290.6	31073.6	38496.8	41308.9	-	-
pme2074	322.2	130.05	323.21	C18H29NO4	[M-H]-	Jasmonoyl-L-Isoleucine	茉莉酰-L-异亮氨酸	Amino acids and derivatives	氨基酸及其衍生物	Amino acids and derivatives	氨基酸及其衍生物	120330-93-0	3	3496.47	1957.56	3831.66	4579.75	5294.94	9841.35	3886.77	3373.11	1974.59	4693.14	4252.24	5616.94	C18699	ko04075
Lmsp004450	359.15	131.05	358.142	C20H22O6	[M+H]+	Dehydrodiconiferyl alcohol	脱氢双松柏醇	Lignans and Coumarins	木脂素和香豆素	Lignans	木脂素	4263-87-0	2	372922	184082	167329	216179	128354	116935	120756	174179	134484	237577	314976	265961	-	-
MWS0502	90.06	61.03	89.0477	C3H7NO2	[M+H]+	β-Alanine	β-丙氨酸	Amino acids and derivatives	氨基酸及其衍生物	Amino acids and derivatives	氨基酸及其衍生物	107-95-9	3	58607.9	62403.1	99248.7	81083.7	87767.3	64410.2	52628.9	72134.5	73085.4	93590.4	76672.2	71457.6	C00099	ko00240,ko00410,ko00640,ko00770,ko01100,ko01110,ko01240
Wmmn002441	183.03	124.02	184.11	C10H16O3	[M-H]-	(E)-Linalool-1-oic acid	(E)-芳樟醇-1-酸	Lipids	脂质	Free fatty acids	游离脂肪酸	-	3	42262.6	66097.3	75950.9	167663	108897	92722.2	119823	63330.8	45251.7	67956.7	83933.5	90563.1	-	-
pmb0532	349.05	137.05	348.047	C10H13N4O8P	[M+H]+	Inosine 5'-monophosphate	5'-肌苷酸	Nucleotides and derivatives	核苷酸及其衍生物	Nucleotides and derivatives	核苷酸及其衍生物	131-99-7	3	114357	63709.9	109461	154587	126162	145027	166752	111637	121289	124988	167147	149860	C00130	ko00230,ko01100,ko01110,ko01232,ko01240
Hayp002900	384.12	237.07	383.112	C19H17N3O6	[M+H]+	Dichotomine H	Dichotomine H	Alkaloids	生物碱	Alkaloids	生物碱	-	1	2.01888e+07	1.26939e+06	1.77111e+07	1.12853e+07	1.11406e+07	5.81405e+06	2.01435e+06	347730	1.26713e+06	8.66389e+06	1.14433e+07	9.53433e+06	-	-
Lmtn002565	329.11	167.03	330.095	C14H18O9	[M-H]-	1-O-Vanilloyl-D-Glucose	1-O-香草酰-D-葡萄糖	Phenolic acids	酚酸类	Phenolic acids	酚酸类	-	2	17976.2	28218.3	9614.98	21510.3	33005.7	20121.3	7995.32	8736.62	12083.6	10265.6	13248	13419.7	C20470	-
mws0704	140.01	78.96	141.019	C2H8NO4P	[M-H]-	O-Phosphorylethanolamine	磷酸乙醇胺	Alkaloids	生物碱	Alkaloids	生物碱	1071-23-4	3	17058	9458.81	15545.3	18039.4	76555	62716.6	34075.9	11414.1	9991.63	32750.2	43855.4	38854.8	C00346	ko00563,ko00564,ko00600,ko01100
Zjmp102706	441.33	405.32	440.329	C29H44O3	[M+H]+	3-Hydroxy-30-noroleana-12,20(29)-dien-28-oic acid (Akebonic acid)	3-羟基-30-去甲基齐墩果烷-12,20(29)-二烯-28-酸	Terpenoids	萜类	Triterpene	三萜	104777-60-8	3	133274	75552.3	120614	190348	254618	58030.8	26110.1	39063.5	24886.2	103086	90668.9	120827	-	-
Lmhp112042	355.28	263.24	354.277	C21H38O4	[M+H]+	1-Linoleoylglycerol*	1-亚油酰甘油酯*	Lipids	脂质	Glycerol ester	甘油酯	2277-28-3	1	553781	399451	369936	293437	330407	324991	187436	229165	132590	437738	581598	553299	-	-
MWS5173	112.05	70.03	111.043	C4H5N3O	[M+H]+	Isocytosine	异胞嘧啶	Nucleotides and derivatives	核苷酸及其衍生物	Nucleotides and derivatives	核苷酸及其衍生物	108-53-2	3	351265	41248.3	179277	79459.9	650067	113130	1.27941e+06	201883	46746.9	399896	507537	530500	-	-
pmd0147	548.37	184.07	547.364	C28H54NO7P	[M+H]+	LysoPC 20:2*	溶血磷脂酰胆碱 20:2*	Lipids	脂质	LPC	溶血磷脂酰胆碱	-	3	156921	131397	82688	332951	945050	608181	846101	495359	536533	288954	359909	276461	-	-
mws0034	457.08	169.01	458.085	C22H18O11	[M-H]-	Epigallocatechin-3-gallate*	表没食子儿茶素-3-没食子酸酯*	Flavonoids	黄酮	Flavanols	黄烷醇类	989-51-5	2	60347.8	63873.9	50592.4	131666	361778	114495	68545.9	73657.8	69126.1	122622	94805.5	124606	C09731	-
mws0277	191.06	85.03	192.063	C7H12O6	[M-H]-	Quinic Acid	奎宁酸	Organic acids	有机酸	Organic acids	有机酸	77-95-2	2	1.25258e+07	2.42017e+07	4.28036e+07	1.38435e+07	1.97654e+07	1.81883e+07	6.96596e+07	2.5333e+07	2.69441e+07	2.09399e+07	2.31505e+07	2.78209e+07	C00296	ko00400,ko01100
MWSmce608	148.1	74.02	147.089	C6H13NO3	[M+H]+	4-Hydroxy-L-Isoleucine	4-羟基-L-异亮氨酸	Amino acids and derivatives	氨基酸及其衍生物	Amino acids and derivatives	氨基酸及其衍生物	781658-23-9	3	129863	112200	157094	68313.1	94402.3	54442.1	111870	81996.6	44411.2	71753.8	96638.1	84913.7	-	-
mws1208	175.17	157.16	174.162	C10H22O2	[M+H]+	1,10-Decanediol	1,10-癸二醇	Others	其它类	Saccharides	糖类	112-47-0	3	301868	179938	317579	134113	302990	329548	233345	218000	192677	266886	198973	225916	-	-
pme3311	338.99	96.97	339.996	C6H14O12P2	[M-H]-	D-Fructose-1,6-biphosphate	D-果糖-1,6-二磷酸	Others	其它类	Saccharides	糖类	488-69-7	3	31310.5	56855.7	57715.9	85568.4	96792	87212.2	17776.1	34704.5	35608.1	39656.2	49332.3	53409.6	C00354	ko00400,ko00710,ko01100,ko01110,ko01200
pmb2855	307.11	145.06	308.122	C11H20N2O8	[M-H]-	L-Glutamine-O-glycoside	L-谷氨酰胺-O-葡萄糖苷	Amino acids and derivatives	氨基酸及其衍生物	Amino acids and derivatives	氨基酸及其衍生物	-	3	95766.4	144511	387920	141239	187620	176996	51157.3	85580.6	109927	89958.6	87934.9	113968	-	-
Lmbn000198	133.01	71.01	134.022	C4H6O5	[M-H]-	3-Dehydro-L-Threonic Acid	3-脱氢-L-苏糖酸	Others	其它类	Saccharides	糖类	-	3	6.1468e+06	1.11859e+07	1.85052e+07	6.21629e+06	1.44487e+07	5.23308e+06	2.11332e+07	5.82443e+06	8.07399e+06	8.41132e+06	9.91607e+06	1.13811e+07	C03064	ko00053,ko01100
Lmfn004093	435.13	315.09	436.137	C21H24O10	[M-H]-	Phloretin-4'-O-glucoside (Trilobatin)	根皮素-4'-O-葡萄糖苷	Flavonoids	黄酮	Chalcones	查耳酮	4192-90-9	1	552607	2.86553e+06	429667	2.39648e+06	1.78035e+06	3.07929e+06	1.50931e+06	2.30359e+06	1.51784e+06	1.09751e+06	1.26349e+06	1.4804e+06	-	-
Lmsn000381	341.11	89.02	342.116	C12H22O11	[M-H]-	D-Maltose	D-麦芽糖	Others	其它类	Saccharides	糖类	69-79-4	1	897960	876198	1.23909e+06	886007	1.21902e+06	863293	518881	853243	533161	972687	744584	984493	C01971	-
mws0749	137.02	93.03	138.032	C7H6O3	[M-H]-	4-Hydroxybenzoic acid	4-羟基苯甲酸	Phenolic acids	酚酸类	Phenolic acids	酚酸类	99-96-7	3	766992	891507	805605	656719	763428	542630	430323	505548	247848	679952	868697	912287	C00156	ko00130,ko00790,ko01100,ko01110,ko01240
Ymjm000148	299.11	137.02	300.121	C14H20O7	[M-H]-	Salidroside	红景天苷	Phenolic acids	酚酸类	Phenolic acids	酚酸类	10338-51-9	1	1.67977e+07	8.81735e+06	1.64953e+07	7.49323e+06	1.54959e+07	1.00425e+07	3.85214e+06	3.93002e+06	2.67653e+06	4.66659e+06	5.04908e+06	6.20596e+06	C06046	ko00350,ko01100
pme2743	194.08	91.05	193.074	C10H11NO3	[M+H]+	N-Phenylacetylglycine	N-苯乙酰甘氨酸	Amino acids and derivatives	氨基酸及其衍生物	Amino acids and derivatives	氨基酸及其衍生物	500-98-1	3	40950.8	8744.02	70426.4	21239.6	31957.6	3863.26	14750.4	28654.4	26347.3	27655.9	26012.3	20517.1	C05598	ko00360
Lmhp010515	510.36	184.07	509.348	C25H52NO7P	[M+H]+	LysoPC 17:0(2n isomer)*	溶血磷脂酰胆碱 17:0(2n异构)*	Lipids	脂质	LPC	溶血磷脂酰胆碱	-	1	920836	422500	1.00764e+06	1.96082e+06	4.39011e+06	2.32409e+06	1.78901e+06	1.75706e+06	1.50151e+06	1.28053e+06	1.47921e+06	1.09094e+06	-	-
Lhhp120823	193.08	105.07	192.079	C11H12O3	[M+H]+	Eugenyl formate	甲酸丁子香酚酯	Others	其它类	Others	其它	-	1	396228	307299	906378	285674	1.13786e+06	249144	89855	136608	177906	207638	270280	212524	-	-
Zmfn000481	535.04	323.03	536.044	C14H22N2O16P2	[M-H]-	Uridine-5'-Diphosphate-D-Xylose	尿苷-5'-二磷酸-D-木糖	Nucleotides and derivatives	核苷酸及其衍生物	Nucleotides and derivatives	核苷酸及其衍生物	3616-06-6	1	199496	178187	261028	216859	203128	138281	158722	131410	145916	144678	195964	180696	C00190	ko00520,ko00908,ko01100,ko01250
mws0341	131.07	85.07	132.079	C6H12O3	[M-H]-	2-Hydroxyisocaproic acid	2-羟基异己酸	Organic acids	有机酸	Organic acids	有机酸	20312-37-2	3	201533	226636	196550	189548	190765	56456.5	121135	81659.9	64010.8	109720	103974	137143	C03264	-
Wagp009079	403.14	373.09	402.132	C21H22O8	[M+H]+	3,5,6,7,8,4'-Hexamethoxyflavone	3,5,6,7,8,4'-六甲氧基黄酮	Flavonoids	黄酮	Flavones	黄酮	34170-18-8	1	7978.12	35748.5	5827.75	29939.1	3753.78	21843.3	1914.89	52437.9	6682.4	19687	22511.9	16565.3	-	-
MWSmce394	487.34	469.33	488.35	C30H48O5	[M-H]-	2,3,19-Trihydroxyurs-12-en-28-oic acid (Tormentic acid)	2,3,19-三羟基熊果-12-烯-28-酸 (委陵菜酸)	Terpenoids	萜类	Triterpene	三萜	13850-16-3	1	53821.3	11266.6	16674.3	111009	95755.5	14749.7	8691.26	4341.86	8409.52	41874.9	35085.7	31008.5	-	-
mws0668	283.07	151.03	284.076	C10H12N4O6	[M-H]-	Xanthosine	黄苷	Nucleotides and derivatives	核苷酸及其衍生物	Nucleotides and derivatives	核苷酸及其衍生物	146-80-5	3	83323.4	30813.1	46247.9	94698.6	167252	57215.4	98481.2	24471.6	56908.9	164985	213747	166320	C01762	ko00230,ko00232,ko01100,ko01110,ko01232,ko02010
pmb2507	213.02	96.97	214.024	C5H11O7P	[M-H]-	2-Deoxyribose-1-phosphate*	2-脱氧核糖-1-磷酸*	Nucleotides and derivatives	核苷酸及其衍生物	Nucleotides and derivatives	核苷酸及其衍生物	17210-42-3	3	105747	126775	209213	137842	160516	115072	281229	106421	86908.4	71485	78922.8	95995.6	C00672	ko00030,ko00240,ko01100
pma0702	558.28	207.07	557.274	C29H39N3O8	[M+H]+	N1,N8-Bis(sinapoyl)spermidine	N1,N8-双(芥子酰)亚精胺	Alkaloids	生物碱	Phenolamine	酚胺	-	3	1.38052e+06	88608.5	360612	136470	343060	72572	12430.7	22606.1	27722.7	421479	560050	450158	C21170	-
Wmcp000031	629.2	137.06	628.2	C28H36O16	[M+H]+	inerminoside D	吲哚美辛 D	Terpenoids	萜类	Monoterpenoids	倍萜	-	2	1.19566e+07	1.05013e+07	7.0658e+06	7.56683e+06	1.05826e+07	6.44763e+06	4.73746e+06	2.55216e+06	2.30231e+06	3.40707e+06	4.15601e+06	3.08749e+06	-	-
Lmqp000329	296.07	104.11	295.057	C8H14N3O7P	[M+H]+	5-Aminoimidazole ribonucleotide	5-氨基咪唑核糖核苷酸	Nucleotides and derivatives	核苷酸及其衍生物	Nucleotides and derivatives	核苷酸及其衍生物	25635-88-5	3	22192.2	273237	40641.7	95716.9	65272.3	69824.9	9677.99	19191.1	29253.8	150526	133830	109954	-	-
Jmgn004021	449.11	269.05	450.116	C21H22O11	[M-H]-	6-C-Glucosyl-2-Hydroxynaringenin	6-碳葡萄糖基-2-羟基柚皮素	Flavonoids	黄酮	Flavanones	二氢黄酮	-	2	352393	284376	199858	177133	348351	216479	77094	99005.8	45797.5	147409	198855	163044	-	-
Lmbn002648	163.04	119.05	164.047	C9H8O3	[M-H]-	α-Hydroxycinnamic Acid*	α-羟基肉桂酸*	Phenolic acids	酚酸类	Phenolic acids	酚酸类	5801-57-0	3	91288.2	66436.5	68013.5	153783	121391	64591.2	63552.7	94456.2	78931.3	183699	214417	156749	C02763	ko00360,ko01100
Lmmn001643	163.04	119.05	164.047	C9H8O3	[M-H]-	2-Hydroxycinnamic acid*	2-羟基肉桂酸*	Phenolic acids	酚酸类	Phenolic acids	酚酸类	583-17-5	3	91288.2	66436.5	68013.5	153783	121391	64591.2	63552.7	94456.2	78931.3	183699	214417	156749	C01772	ko00360,ko00999,ko01100,ko01110
Zmjp000182	189.13	70.07	188.127	C7H16N4O2	[M+H]+	N-Monomethyl-L-arginine	N-单甲基-L-精氨酸	Amino acids and derivatives	氨基酸及其衍生物	Amino acids and derivatives	氨基酸及其衍生物	17035-90-4	2	1.91419e+06	136300	329332	94978	1.07767e+06	700230	2.67521e+06	479295	208338	2.4864e+06	2.7515e+06	2.00773e+06	C03884	-
Lmhp009190	679.39	263.24	678.383	C33H58O14	[M+H]+	2-Linoleoylglycerol-1,3-di-O-glucoside*	2-亚油酰甘油酯-1,3-二-O-葡萄糖苷*	Lipids	脂质	Glycerol ester	甘油酯	-	1	128626	118541	94195	150391	86038.5	135712	212748	130796	288709	121822	136718	165372	-	-
pmb3114	561.14	289.07	562.148	C30H26O11	[M-H]-	Epicatechin-epiafzelechin	表儿茶素表阿夫儿茶精	Flavonoids	黄酮	Flavanols	黄烷醇类	-	3	13259.5	53869.6	4100.76	49718.1	70442.1	56669.7	52735	19880.2	27525.6	16221.7	20581.6	22179.2	-	-
Li512114	485.36	453.34	486.371	C31H50O4	[M-H]-	2,3-Dihydroxyurs-12-en-28-oic acid methyl ester (Corosolic acid methyl ester)	2,3-二羟基熊果-12-烯-28-酸 甲酯 (科罗索酸甲酯)	Terpenoids	萜类	Triterpene	三萜	4518-70-1	3	7837.43	2036.87	2273.8	144289	1191.76	1222.57	9	9	9	9766.37	7170.24	9211.51	-	-
Lmdp004461	949.26	339.11	948.254	C43H48O24	[M+H]+	Quercetin-3-O-(6''-O-feruloyl)glucoside-7-O-rutinoside	槲皮素-3-O-(6''-O-阿魏酰)葡萄糖苷-7-O-芸香糖苷	Flavonoids	黄酮	Flavonols	黄酮醇	-	2	8803.21	14509.3	10684.2	7270.21	21772.4	13291	7362.88	9040.37	35038.8	27980.3	26016	20468.3	-	-
pmn001375	535.18	373.13	536.189	C26H32O12	[M-H]-	1-Hydroxypinoresinol-1-O-Glucoside	1-羟基松脂醇-1-O-葡萄糖苷	Lignans and Coumarins	木脂素和香豆素	Lignans	木脂素	81495-71-8	2	455903	350119	135285	40541	119371	54120.2	39694	36295.5	30561.8	281019	383678	321426	-	-
Lmjp002906	479.12	317.07	478.111	C22H22O12	[M+H]+	Rhamnetin-3-O-Glucoside*	鼠李素-3-O-葡萄糖苷*	Flavonoids	黄酮	Flavonols	黄酮醇	27875-34-9	1	468155	637888	408889	1.75797e+06	3.74607e+06	2.25867e+06	234665	432684	304439	220300	302625	260907	-	-
Hmlp003068	627.15	303.05	626.148	C27H30O17	[M+H]+	Meratin	蜡梅苷	Flavonoids	黄酮	Flavones	黄酮	27215-04-9	2	174051	143043	498615	105146	143474	79547	25410.6	48071.3	31494	131440	135381	100067	-	-
MWS1882	132.03	88.04	133.037	C4H7NO4	[M-H]-	Iminodiacetic acid	亚氨基二乙酸	Organic acids	有机酸	Organic acids	有机酸	142-73-4	3	169044	119164	127896	281046	547643	355900	336148	244622	285270	289759	234441	322900	C19911	-
mws0863	213.02	96.97	214.024	C5H11O7P	[M-H]-	2-Deoxyribose-5'-phosphate*	2-脱氧核糖-5'-磷酸*	Nucleotides and derivatives	核苷酸及其衍生物	Nucleotides and derivatives	核苷酸及其衍生物	102916-66-5	3	52588.7	56355.5	87669.7	65746.1	133342	78337.8	145656	61474.2	60674.6	50350.2	51420.6	66231.1	C00673	ko00030,ko01100
mws0628	121.03	92.03	122.037	C7H6O2	[M-H]-	4-Hydroxybenzaldehyde	4-羟基苯甲醛	Phenolic acids	酚酸类	Phenolic acids	酚酸类	123-08-0	3	1.17525e+06	240608	501836	618882	427554	175619	203253	207262	156261	429685	488025	587107	C00633	ko01100
Lmdp004574	803.2	339.11	802.196	C37H38O20	[M+H]+	Quercetin-3-O-(2'''-O-feruloyl)sophoroside	槲皮素-3-O-(2'''-O-阿魏酰)槐糖苷	Flavonoids	黄酮	Flavonols	黄酮醇	-	3	35398.5	34565	19314.9	30252.5	49361	24800.2	11737.8	12553.2	5683.3	19775.4	14346.3	17822.5	-	-
mws2124	154.98	78.96	155.982	C2H5O6P	[M-H]-	2-Phosphoglycolate	2-磷酸乙醇酸	Organic acids	有机酸	Organic acids	有机酸	13147-57-4	3	21817.6	45121.2	35503.9	64241.3	44980.5	40206.8	33174.6	59501.1	70871.1	32588.9	43493.5	43651	-	-
pme1975	103	59.01	104.011	C3H4O4	[M-H]-	Malonic acid	丙二酸	Organic acids	有机酸	Organic acids	有机酸	141-82-2	3	281649	153599	343119	351550	180878	176605	101592	77935.6	106171	159739	188087	219936	C00383	ko00061,ko00240,ko00410,ko01100,ko01212
mws0976	243.06	153.03	244.07	C9H12N2O6	[M-H]-	β-Pseudouridine	β-假尿苷	Nucleotides and derivatives	核苷酸及其衍生物	Nucleotides and derivatives	核苷酸及其衍生物	1445-07-4	3	47034.5	42513.4	35431.4	74511	93900.7	70914.2	44481.7	51140	57187.6	39763.2	48909.9	54897.5	C02067	ko00240,ko01100
Hmgp002327	188.07	118.06	187.063	C11H9O2N	[M+H]+	3-amino-2-naphthoic acid	3-氨基-2-萘甲酸	Alkaloids	生物碱	Alkaloids	生物碱	-	1	8.51167e+06	1.05178e+07	877291	3.64649e+06	2.18325e+07	4.43578e+06	9.76863e+06	1.52171e+06	1.17403e+06	5.8351e+06	6.54904e+06	4.73643e+06	-	-
pmp000316	473.36	455.35	472.355	C30H48O4	[M+H]+	16-Hydroxytrametenolic acid	16-羟基栓菌酸	Terpenoids	萜类	Triterpene	三萜	176390-68-4	2	84177.1	24165.4	79668.3	462886	41427.7	14943.8	11163.7	10092.5	11536.3	62762.6	74795	86710.4	-	-
Zmjp011129	473.36	455.35	472.355	C30H48O4	[M+H]+	1,3-Dihydroxyurs-12-en-28-oic acid (Kaneric acid)	1,3-二羟基熊果-12-烯-28-酸 (Kaneric acid)	Terpenoids	萜类	Triterpene	三萜	107693-87-8	2	84177.1	24165.4	79668.3	462886	41427.7	14943.8	11163.7	10092.5	11536.3	62762.6	74795	86710.4	-	-
pmb0034	277.1	148.06	276.096	C10H16N2O7	[M+H]+	L-α-Glutamyl-L-Glutamic Acid	L-谷氨酰-L-谷氨酸	Amino acids and derivatives	氨基酸及其衍生物	Amino acids and derivatives	氨基酸及其衍生物	3929-61-1	3	32230	24027.6	28881.8	24924.6	32980.5	38571.4	35464.6	26517.2	28918.5	32225	41214.9	30996.1	C01425	-
Cmcp005676	323.18	291.15	322.168	C20H22N2O2	[M+H]+	Perosine	派洛辛碱,佩绕素	Alkaloids	生物碱	Alkaloids	生物碱	-	2	89558	87460.5	74033.9	43586.5	35539.4	31806.7	27339.6	37719.1	23687.8	69808.4	96666.1	85756.4	-	-
Lacp005171	371.21	133.1	370.199	C19H30O7	[M+H]+	3-(3'-Hydroxybutyl)-2,4,4-trimethylcyclohexa-2,5-dienone glucoside	3-(3'-羟基丁基)-2,4,4-三甲基环己烷-2,5-二烯酮葡萄糖苷	Terpenoids	萜类	Sesquiterpenoids	倍半萜	-	1	6952.56	4987.91	3928.08	134593	26142.7	7996.95	9	9	9	499096	679747	552986	-	-
Lssp210188	377.16	163.08	376.152	C20H24O7	[M+H]+	(7'R)-7'-Hydroxylariciresinol	(7'R)-7''-羟基落叶松醇	Others	其它类	Others	其它	-	2	50718.3	41692.8	49185.9	35494.3	45962.6	26589.8	17671.8	57431.4	33523.7	37836.9	51459.1	41627	-	-
Lbhp011918	503.14	179.03	502.132	C21H26O14	[M+H]+	Esculin glucoside(iso-01)	秦皮甲素葡萄糖苷(iso-01)	Lignans and Coumarins	木脂素和香豆素	Coumarins	香豆素	-	2	1.96623e+06	3.99567e+06	830194	1.61444e+06	1.45281e+06	1.84835e+06	2.11208e+06	995406	1.35699e+06	903451	1.24836e+06	1.06257e+06	-	-
HJAP006	509.13	347.08	508.122	C23H24O13	[M+H]+	Syringetin-7-O-glucoside	丁香亭-7-O-葡萄糖苷	Flavonoids	黄酮	Flavonols	黄酮醇	-	3	15322.1	55179.8	52984.8	75512.9	105118	122452	70051.7	27970.7	40377	83160.8	100156	72540.9	-	-
Llhp011709	649.39	469.33	648.387	C36H56O10	[M+H]+	Serratagenic Acid glucoside	三对节酸葡萄糖苷	Terpenoids	萜类	Triterpene Saponin	三萜皂苷	-	2	104950	99966.6	51943.3	32511	51544	56739.3	76621.2	89171.5	87454.8	59315.8	65295.5	46972.6	-	-
mws3133	174.08	86.06	173.069	C7H11NO4	[M+H]+	Oxaceprol	N-乙酰-L-4-羟基脯氨酸	Amino acids and derivatives	氨基酸及其衍生物	Amino acids and derivatives	氨基酸及其衍生物	33996-33-7	3	68653.2	26631.3	64277.2	70710.2	80265.5	21689.4	35145.5	25556.5	12480.2	32132	36301.7	44220.4	-	-
Lhjp111622	359.13	151.04	358.126	C16H22O9	[M+H]+	Dehydroxysecologanic acid	脱氧断马钱子酸	Terpenoids	萜类	Monoterpenoids	倍萜	-	1	205872	3103.79	197787	127762	171610	112287	131197	94849.1	70096.2	93725.2	79811.3	110858	-	-
mws0355	441.08	169.01	442.09	C22H18O10	[M-H]-	Catechin gallate*	儿茶素没食子酸酯*	Flavonoids	黄酮	Flavanols	黄烷醇类	130405-40-2	1	41640.5	40521.6	44441.4	345988	274628	203621	66752	85108.4	40131.7	119076	137051	98313.4	-	-
MWS1900	215.13	153.13	216.136	C11H20O4	[M-H]-	Undecanedioic acid	十一烷二酸	Lipids	脂质	Free fatty acids	游离脂肪酸	1852-04-6	3	7749.44	10663.7	16644.7	7333	7096.46	8640.38	6835.62	9345.84	5589.92	7945.48	9902.47	7253.37	-	-
mws2184	207.07	135.04	208.074	C11H12O4	[M-H]-	Ethyl caffeate	咖啡酸乙酯	Phenolic acids	酚酸类	Phenolic acids	酚酸类	102-37-4	3	33600.7	8028.38	48222.4	23669.6	14595	13649.9	15743.8	11872.1	18704	8261.77	11118.3	8697.24	-	-
MWSmce676	149.05	59.01	150.053	C5H10O5	[M-H]-	D-Arabinose	D-阿拉伯糖	Others	其它类	Saccharides	糖类	10323-20-3	3	57247.5	104050	97678.8	77244.8	59761.1	67601.3	26972.2	95792.9	53697.4	64574.5	59341.4	46394.2	C00216	ko00040,ko00053,ko00520,ko01100,ko01250
Lmrj002087	247.13	86.09	246.122	C10H18N2O5	[M+H]+	L-Isoleucyl-L-Aspartate	L-异亮氨酰-L-天冬氨酸	Amino acids and derivatives	氨基酸及其衍生物	Amino acids and derivatives	氨基酸及其衍生物	-	3	160944	142125	246621	334082	363757	389406	226456	152645	198150	257358	320465	234043	-	-
MWS4309	262.12	188.07	261.111	C13H15N3O3	[M+H]+	Glycyl-tryptophan	甘氨酰-色氨酸	Amino acids and derivatives	氨基酸及其衍生物	Amino acids and derivatives	氨基酸及其衍生物	2390-74-1	3	83741.6	77445	99694.8	52355	41438.9	50813.2	72171.1	38870.1	67469.9	63152.7	81951.1	61436.8	-	-
pme2617	166.05	102.06	165.046	C5H11NO3S	[M+H]+	L-Methionine Sulfoxide	蛋氨酸亚砜	Amino acids and derivatives	氨基酸及其衍生物	Amino acids and derivatives	氨基酸及其衍生物	3226-65-1	3	6.45798e+06	5.64233e+06	6.08119e+06	5.96424e+06	5.88759e+06	6.27018e+06	1.03385e+07	6.84434e+06	6.94928e+06	9.03682e+06	7.55062e+06	1.05433e+07	C02989	ko00270,ko01100
HJAP020	613.15	289.07	612.169	C27H32O16	[M+H]+	Eriodictyol-5,3'-Di-O-glucoside	圣草酚-5,3'-二-O-葡萄糖苷	Flavonoids	黄酮	Flavanones	二氢黄酮	-	3	72503.3	68883	117111	71983.6	108277	65439.5	55226	68710.6	154611	75227.7	104687	97087.6	-	-
Lmsn002494	433.04	301	434.048	C19H14O12	[M-H]-	Ellagic acid-4-O-Xyloside	鞣花酸-4-O-木糖苷	Tannins	鞣质	Tannin	鞣质	139163-18-1	2	97824	115973	119492	106160	106956	110554	180609	187772	140523	146357	127845	104549	-	-
Zjmp102716	473.32	437.3	472.319	C29H44O5	[M+H]+	2,3,23-Trihydroxy-30-norolean-12,20(21)-dien-28-oic acid	2,3,23-三羟基-30-去甲基齐墩果-12,20(21)-二烯-28-酸	Terpenoids	萜类	Triterpene	三萜	-	2	360767	214795	229835	293357	175258	148310	115822	198873	133169	285614	372102	279274	-	-
mws1350	181.05	151	182.058	C9H10O4	[M-H]-	Syringaldehyde; 4-Hydroxy-3,5-Dimethoxybenzaldehyde	丁香醛; 4-羟基-3,5-二甲氧基苯甲醛	Phenolic acids	酚酸类	Phenolic acids	酚酸类	134-96-3	3	40966.1	28795.4	25184.8	26422.6	40255.7	9020.26	15894.6	11342	21364.4	42955.9	30798.8	35993	-	-
pmb0880	482.32	341.31	481.317	C23H48NO7P	[M+H]+	LysoPE 18:0(2n isomer)	溶血磷脂酰乙醇胺 18:0(2n异构)	Lipids	脂质	LPE	溶血磷脂酰乙醇胺	-	3	110371	36400.9	50211.2	50955.9	73236.2	47724.6	80490	57936.7	54252	77474.5	89081.5	63511.8	-	-
pme2755	222.1	138.05	221.09	C8H15NO6	[M+H]+	N-Acetyl-D-glucosamine*	N-乙酰-D-葡萄糖胺*	Others	其它类	Saccharides	糖类	7512-17-6	3	646380	1.03163e+06	1.64995e+06	2.03412e+06	1.36132e+06	1.56006e+06	250299	1.89241e+06	1.6523e+06	522204	595738	726301	C00140	ko00520,ko01100,ko01250,ko02010
pmp000581	475.12	271.06	474.116	C23H22O11	[M+H]+	Apigenin-7-O-(6''-acetyl)glucoside	芹菜素-7-O-(6''-乙酰)葡萄糖苷	Flavonoids	黄酮	Flavones	黄酮	72741-92-5	3	10936.2	9627.21	8765.87	6330.78	7301.72	5225.35	3610.28	3261.33	2692.09	8657.06	6968.53	9811.9	-	-
Jmbp006554	389.12	359.07	388.116	C20H20O8	[M+H]+	Ethyl Rosmarinate	迷迭香酸乙酯	Phenolic acids	酚酸类	Phenolic acids	酚酸类	-	1	12596.7	50116.7	3762.38	67587.7	5691.14	22105.1	1298.29	92737.7	14630.2	25721.7	36000	33482.4	-	-
pme1201	273.08	167.03	274.084	C15H14O5	[M-H]-	Phloretin	根皮素	Flavonoids	黄酮	Chalcones	查耳酮	60-82-2	3	6588.01	19822.1	6082.89	14306.5	44125.6	22271.1	23222.3	16164.3	19149.6	11635.5	10284.6	14309.7	C00774	ko00941,ko01110
Lmhp008742	542.32	184.07	541.317	C28H48NO7P	[M+H]+	LysoPC 20:5	溶血磷脂酰胆碱 20:5	Lipids	脂质	LPC	溶血磷脂酰胆碱	162440-04-2	1	478121	756.135	31685.8	260308	8380.56	32730.8	3496.69	10663.2	3184.54	300514	408588	317536	-	-
MWSmce294	209.11	153.05	208.11	C12H16O3	[M+H]+	Elemicin	榄香素	Phenolic acids	酚酸类	Phenolic acids	酚酸类	487-11-6	2	208503	131762	339941	73086.2	77559	20986	18440.6	31841.9	28609.6	66536.8	77670	55099.1	C10451	-
pme3007	402.99	158.93	404.002	C9H14N2O12P2	[M-H]-	Uridine 5'-diphosphate	尿苷 5'-二磷酸	Nucleotides and derivatives	核苷酸及其衍生物	Nucleotides and derivatives	核苷酸及其衍生物	27821-45-0	3	17111.9	21399.8	25139.8	13761.5	17037.5	25417.5	26627.4	26085	29073.3	21778.6	27702.6	30720.6	C00015	ko00240,ko00908,ko01100,ko01232,ko01240
pmn001646	865.2	577.14	866.206	C45H38O18	[M-H]-	Procyanidin C1	原花青素 C1	Tannins	鞣质	Proanthocyanidins	原花青素	37064-30-5	1	12842.7	71354.8	2595.98	57169.7	33771.2	65223	33089.1	27422.4	17330	22951.8	16337.1	21355.7	C17624	-
pmb0296	357.3	265.25	356.293	C21H40O4	[M+H]+	1-Oleoyl-Sn-Glycerol	单酰甘油酯(18:1)	Lipids	脂质	Glycerol ester	甘油酯	129784-87-8	3	544267	702198	361268	718232	333669	518981	590437	342020	670447	644890	456848	547968	-	-
mws0576	103.04	59.01	104.047	C4H8O3	[M-H]-	3-Hydroxybutyric acid	3-羟基丁酸	Organic acids	有机酸	Organic acids	有机酸	300-85-6	3	346238	197959	395181	408883	173749	172828	167213	202150	52664.9	218030	285349	306478	C01089	ko00650,ko01100
pme0170	217.13	158.08	216.122	C8H16N4O3	[M+H]+	N-Acetyl-L-Arginine	N-乙酰-L-精氨酸	Amino acids and derivatives	氨基酸及其衍生物	Amino acids and derivatives	氨基酸及其衍生物	155-84-0	3	86723.2	16105	26262.8	9001.66	57696.6	7805.32	59547.6	13350.4	18113.9	65741.2	52447.3	47461.5	-	-
MWSHY0046	465.1	303.05	464.096	C21H20O12	[M+H]+	Quercetin-3-O-glucoside (Isoquercitrin)*	槲皮素-3-O-葡萄糖苷(异槲皮苷)*	Flavonoids	黄酮	Flavonols	黄酮醇	482-35-9	1	719581	1.08089e+06	329818	6.04017e+06	6.80339e+06	6.27499e+06	931725	1.63516e+06	1.1672e+06	1.12416e+06	1.40691e+06	1.01485e+06	C05623	ko00944,ko01100,ko01110
Lmhp007598	534.36	184.07	533.348	C27H52NO7P	[M+H]+	LysoPC 19:2(2n isomer)*	溶血磷脂酰胆碱 19:2(2n异构)*	Lipids	脂质	LPC	溶血磷脂酰胆碱	-	2	551207	32446.6	125456	486547	375686	81102.8	42714.4	48710.5	26907.1	149286	189417	137579	-	-
HX1367	147.04	91.06	146.037	C9H6O2	[M+H]+	coumarin(ISO2)	香豆素(ISO2)	Lignans and Coumarins	木脂素和香豆素	Coumarins	香豆素	-	2	279584	358900	95787.3	518756	580120	483242	330715	398881	314589	339203	240424	285907	-	-
Hmgn001653	137.02	93.04	138.032	C7H6O3	[M-H]-	Protocatechualdehyde	原儿茶醛	Phenolic acids	酚酸类	Phenolic acids	酚酸类	139-85-5	3	666307	464669	510507	408806	533965	383348	378339	328705	141699	517763	727227	600179	C16700	ko00950
pmb3072	481.14	319.3	482.142	C22H26O12	[M-H]-	3-O-p-Coumaroylshikimic acid-O-glucoside	3-O-对香豆酰莽草酸-O-葡萄糖苷	Phenolic acids	酚酸类	Phenolic acids	酚酸类	-	3	22423.8	26623.9	27026.2	16576.9	13893.3	12858.5	17828.8	10829.9	11494.1	10833.2	14964	11844.7	-	-
Lmhp009890	546.36	184.07	545.348	C28H52NO7P	[M+H]+	LysoPC 20:3	溶血磷脂酰胆碱 20:3	Lipids	脂质	LPC	溶血磷脂酰胆碱	1199257-41-4	3	481192	8628.47	105220	430740	15450.8	35573.4	46113.8	11173.7	9013.77	94804.9	119927	86835.1	-	-
Jmlp004238	371.2	133.1	370.199	C19H30O7	[M+H]+	Byzantionoside A	Byzantionoside A	Others	其它类	Ketone compounds	酮类化合物	189109-41-9	3	9610.9	976.691	17729	104784	16928.8	2080.58	581.969	10144.4	19386.8	558960	647870	456818	-	-
pme1651	176.07	130.07	175.063	C10H9NO2	[M+H]+	Indole-3-acetic acid (IAA)	吲哚-3-乙酸<植物生长激素>	Alkaloids	生物碱	Plumerane	吲哚类生物碱	87-51-4	3	39947.6	31028.8	48019.9	45041.7	25850	18185.9	25967.7	53328.2	27046	43163.1	50766.5	60912.6	C00954	ko00380,ko01100,ko04075
pmn001511	285.1	123.05	286.105	C13H18O7	[M-H]-	3-Hydroxy-5-Methylphenol-1-O-Glucoside	3-羟基-5-甲基苯酚-1-氧-葡萄糖苷	Phenolic acids	酚酸类	Phenolic acids	酚酸类	-	3	15543.1	20099.3	15320.2	4976.97	18395.6	4884.38	4205.24	935.731	3519.16	23296.4	17476	17496.4	-	-
Yshs000048	471.34	407.33	470.34	C30H46O4	[M+H]+	6-Hydroxy-lupane-20(29)-en-3-one-28-oic acid	6-羟基羽扇豆烷-20(29)-烯-3-酮-28-酸	Terpenoids	萜类	Triterpene	三萜	-	2	89000.4	51525.2	34246.1	120552	73507.6	17842.2	21633.6	12948.7	14819.9	33647.6	43145	47762.2	-	-
Zmgn000216	125	78.96	126.008	C2H7O4P	[M-H]-	2-Hydroxyethylphosphonic acid	2-羟基乙基膦酸	Organic acids	有机酸	Organic acids	有机酸	22987-21-9	3	593556	1.75205e+06	3.65277e+06	1.61891e+06	1.26143e+06	1.83002e+06	566416	804681	895115	162113	198376	230426	C06451	ko00440,ko01100,ko01110
mws0061	463.09	300.03	464.096	C21H20O12	[M-H]-	Quercetin-3-O-galactoside (Hyperin)	槲皮素-3-O-半乳糖苷 (金丝桃苷)	Flavonoids	黄酮	Flavonols	黄酮醇	482-36-0	3	251066	305796	115673	2.23329e+06	2.65661e+06	3.26845e+06	401019	587609	394038	481317	635174	471351	C10073	-
MWS1816	183.14	183.14	184.146	C11H20O2	[M-H]-	10-Undecenoic acid	10-十一烯酸	Lipids	脂质	Free fatty acids	游离脂肪酸	112-38-9	3	23992.3	18337.1	15508.9	19214	12058.5	12940.5	15801.9	21342.8	21101.9	15663.5	12269.5	17436.9	C13910	-
Lskp211385	357.13	307.09	356.126	C20H20O6	[M+H]+	(-)-dihydrosesamin	双氢芝麻脂素	Lignans and Coumarins	木脂素和香豆素	Lignans	木脂素	-	1	139236	29319.4	180225	180847	64646.1	61944.2	64853.8	112864	68374.1	103672	142442	110712	-	-
pmc0960	544.34	184.07	543.332	C28H50NO7P	[M+H]+	LysoPC 20:4	溶血磷脂酰胆碱 20:4	Lipids	脂质	LPC	溶血磷脂酰胆碱	-	3	359654	12670.4	317210	895809	44182.3	49791.1	133265	19059.7	37808.6	138483	185219	138954	-	-
MWS5235	299.26	253.25	300.266	C18H36O3	[M-H]-	12-Hydroxyoctadecanoic acid	12-羟基硬脂酸	Lipids	脂质	Free fatty acids	游离脂肪酸	106-14-9	3	10697	9323.49	11100.3	14107.7	7122.59	15034.6	6465.23	7054.11	9075.63	8308.53	9912.26	6988.08	-	-
MWSslk097	195.06	163.04	194.058	C10H10O4	[M+H]+	Dimethyl phthalate	邻苯二甲酸二甲酯	Phenolic acids	酚酸类	Phenolic acids	酚酸类	131-11-3	1	228754	247983	271025	207860	208537	195308	191631	163206	168198	114984	163913	145565	C11233	-
pmb2319	482.32	184.07	481.317	C23H48NO7P	[M+H]+	LysoPC 15:0*	溶血磷脂酰胆碱 15:0*	Lipids	脂质	LPC	溶血磷脂酰胆碱	108273-89-8	1	840587	1.12649e+06	1.00445e+06	2.722e+06	7.85097e+06	4.74455e+06	7.49289e+06	3.34543e+06	4.39698e+06	2.07568e+06	2.72172e+06	2.00077e+06	-	-
Lmsn003628	547.17	223.06	548.174	C23H32O15	[M-H]-	6'-O-Sinapoylsucrose	6'-O-芥子酰蔗糖	Phenolic acids	酚酸类	Phenolic acids	酚酸类	-	2	95686.5	35411	28218.4	16608.2	65486.4	14234.1	27506.2	9029.82	12221.7	42451.4	60571.4	53178.7	-	-
MWSslk133	257.18	195.18	258.183	C14H26O4	[M-H]-	1,14-Tetradecanedioic Acid	1,14-十四烷二酸	Lipids	脂质	Free fatty acids	游离脂肪酸	821-38-5	3	24573.3	19889.2	24459.6	20155.1	16804.5	16086	16489.8	14734.7	13514.4	16233.3	22822.3	18405.9	-	-
MWSmce333	284.1	152.06	283.092	C10H13N5O5	[M+H]+	Crotonoside; 2-Hydroxyadenosine	巴豆苷; 2-羟基腺苷	Nucleotides and derivatives	核苷酸及其衍生物	Nucleotides and derivatives	核苷酸及其衍生物	1818-71-9	3	823615	555953	695476	1.79096e+06	1.7858e+06	1.16948e+06	929585	1.17752e+06	1.07969e+06	861099	1.1007e+06	792987	C08432	-
Qmyp081607	359.13	121.1	358.126	C16H22O9	[M+H]+	10-Deoxygeniposidic acid	10-脱氧京尼平苷酸	Terpenoids	萜类	Monoterpenoids	倍萜	-	2	182065	241562	140833	143996	289797	179612	109021	230407	184675	119068	166224	130603	C11672	ko00902,ko01110
Lmwp011196	391.28	149.02	390.277	C24H38O4	[M+H]+	Bis(2-ethylhexyl)phthalate	邻苯二甲酸二(2-乙基己基)酯	Phenolic acids	酚酸类	Phenolic acids	酚酸类	117-81-7	2	8.39102e+06	7.74676e+06	1.3213e+07	7.09435e+06	9.10526e+06	7.18196e+06	1.78642e+07	7.53746e+06	8.21869e+06	2.42292e+06	3.21083e+06	3.45312e+06	C03690	-
Hayp001958	257.09	211.09	256.085	C14H12N2O3	[M+H]+	Dichotomine A	Dichotomine A	Alkaloids	生物碱	Alkaloids	生物碱	-	1	2.95417e+06	384906	5.08103e+06	8.7249e+06	511733	252086	170767	275478	185341	1.42962e+06	1.82139e+06	1.30275e+06	-	-
MWS0442	527.16	365.1	504.169	C18H32O16	[M+Na]+	Maltotriose	麦芽三糖	Others	其它类	Saccharides	糖类	1109-28-0	1	1.16346e+06	1.13024e+06	859971	206320	287642	485327	169915	378715	345848	923587	959503	679771	C01835	ko02010
pmd0136	524.37	184.07	523.364	C26H54NO7P	[M+H]+	LysoPC 18:0(2n isomer)	溶血磷脂酰胆碱 18:0(2n异构)	Lipids	脂质	LPC	溶血磷脂酰胆碱	-	1	318886	559641	272816	1.64122e+06	2.50011e+06	1.53781e+06	1.5363e+06	1.60611e+06	1.17539e+06	1.08203e+06	1.34826e+06	952809	-	-
pmf0470	132.07	86.06	131.058	C5H9NO3	[M+H]+	cis-4-Hydroxy-D-proline	顺式-4-羟基-D-脯氨酸	Amino acids and derivatives	氨基酸及其衍生物	Amino acids and derivatives	氨基酸及其衍生物	2584-71-6	3	5.9816e+06	6.45942e+06	2.64986e+06	4.04075e+06	2.4393e+07	2.65915e+06	3.33746e+07	3.47805e+06	4.09838e+06	1.17467e+07	1.45775e+07	1.02809e+07	C03440	ko00470,ko01100
pmb0998	364.07	152.06	363.058	C10H14N5O8P	[M+H]+	Guanosine 5'-monophosphate	鸟苷 5'-单磷酸	Nucleotides and derivatives	核苷酸及其衍生物	Nucleotides and derivatives	核苷酸及其衍生物	85-32-5	3	190390	193140	201127	115317	76435.8	105788	201745	140559	132288	218176	300293	306889	C00144	ko00230,ko01100,ko01232
Rfmb320	144.1	84.08	143.095	C7H13NO2	[M+H]+	1-Methylpiperidine-2-carboxylic acid	1-甲基哌啶-2-羧酸	Organic acids	有机酸	Organic acids	有机酸	7730-87-2	3	801767	895097	696308	879489	729193	698172	1.14422e+06	1.11164e+06	906228	1.04842e+06	728897	954005	-	-
mws2118	435.13	167.04	436.137	C21H24O10	[M-H]-	Phloretin-2'-O-glucoside (Phlorizin)	根皮苷	Flavonoids	黄酮	Chalcones	查耳酮	60-81-1	1	67962.3	143275	35043.2	215444	177385	201850	100735	133628	113518	62205.4	88413.9	84721.7	C01604	ko00941,ko01110
mws4167	463.09	287.06	462.08	C21H18O12	[M+H]+	Luteolin-7-O-glucuronide	木犀草素-7-O-葡萄糖醛酸苷	Flavonoids	黄酮	Flavones	黄酮	29741-10-4	3	109962	103037	170266	181665	141080	59019.1	42950.1	56444.5	84130.5	98321.1	107148	137873	C03515	ko00944
pmp000012	463.09	287.06	462.08	C21H18O12	[M+H]+	Scutellarein-7-O-glucuronide (Scutellarin)	野黄芩素-7-O-葡萄糖醛酸苷 (野黄芩苷)	Flavonoids	黄酮	Flavones	黄酮	27740-01-8	3	109962	103037	170266	181665	141080	59019.1	42950.1	56444.5	84130.5	98321.1	107148	137873	-	-
Lmyn011997	337.31	337.31	338.318	C22H42O2	[M-H]-	Erucic acid	芥酸	Lipids	脂质	Free fatty acids	游离脂肪酸	112-86-7	3	500328	462592	302923	205514	413561	987909	455849	562103	187115	447656	377927	542791	C08316	ko01040
MWSmce148	193.08	161.05	194.079	C7H14O6	[M-H]-	L-Quebrachitol	L-白雀木醇	Others	其它类	Saccharides	糖类	642-38-6	3	61639	67923.5	48812.5	31621.8	65892.2	46523.3	75231.8	56493.3	64750.5	23198.8	33465.1	27916.2	-	-
Zmjn001813	159.07	97.06	160.074	C7H12O4	[M-H]-	Pimelic acid*	庚二酸*	Organic acids	有机酸	Organic acids	有机酸	111-16-0	3	24565.9	27352.3	52891.5	39483.7	30953.3	22987.6	16032.6	17508.9	44426.4	16822.2	24336.2	21871.2	C02656	ko00780,ko01100,ko01240
Lmbn001288	131.03	87.04	132.042	C5H8O4	[M-H]-	2-Hydroxy-2-methyl-3-oxobutanoic acid	2-羟基-2-甲基-3-氧代丁酸	Organic acids	有机酸	Organic acids	有机酸	71698-08-3	3	45969.8	32162	77669.7	31788.9	24670.3	37155.9	20493.8	34393.4	35201.3	27604.6	39837.2	36494.4	C06010	ko00290,ko00650,ko00660,ko00770,ko01100,ko01110,ko01210,ko01230
Lmhp010573	517.34	263.24	516.33	C27H48O9	[M+H]+	1-Linoleoylglycerol-3-O-glucoside*	1-亚油酰甘油酯-3-O-葡萄糖苷*	Lipids	脂质	Glycerol ester	甘油酯	-	2	7384.25	3972.34	8071.1	7453.59	5431.65	5863.94	6898.56	4475.09	6161.15	8174.23	9444.25	11707.8	-	-
pme3200	74.07	57.05	73.064	C2H7N3	[M+H]+	1-Methylguanidine	1-甲基胍	Alkaloids	生物碱	Alkaloids	生物碱	471-29-4	3	13846.2	12116	30931	34400.2	216095	63688	59540.8	10550.3	124576	70613.3	54264.1	78662.4	C02294	-
mws0093	179.07	146.04	180.079	C10H12O3	[M-H]-	Coniferyl alcohol	松柏醇	Phenolic acids	酚酸类	Phenolic acids	酚酸类	458-35-5	3	367704	182575	143670	173680	230477	63514.9	54136.4	55766.7	36045.7	284285	406961	387940	C00590	ko00940,ko00999,ko01100,ko01110
Lmhp001670	231.17	72.08	230.163	C11H22N2O3	[M+H]+	L-Valyl-L-Leucine	L-缬氨酰-L-亮氨酸	Amino acids and derivatives	氨基酸及其衍生物	Amino acids and derivatives	氨基酸及其衍生物	3989-97-7	2	667565	315655	671808	1.52643e+06	1.24957e+06	1.20932e+06	471075	736507	868582	1.02751e+06	1.46455e+06	1.15848e+06	-	-
mws1189	193.04	72.99	194.043	C6H10O7	[M-H]-	D-Galacturonic acid*	D-半乳糖醛酸*	Others	其它类	Saccharides	糖类	685-73-4	3	457950	642097	503695	342716	482622	384347	726807	324873	483199	311129	373525	257635	C00333	ko00040,ko00053,ko00520,ko01100,ko01240,ko01250,ko02010
mad1424	427.05	295.05	426.043	C17H14O13	[M+H]+	Ditartaroyl-hydroxycoumarin	二酒石酰-羟基香豆素	Lignans and Coumarins	木脂素和香豆素	Coumarins	香豆素	-	3	1.00807e+06	865293	1.16623e+06	690602	1.16496e+06	620762	360117	524840	351701	521367	613017	421384	-	-
pme3207	141.02	59.01	142.027	C6H6O4	[M-H]-	Muconic acid	己二烯二酸	Organic acids	有机酸	Organic acids	有机酸	1119-72-8	3	7.06089e+06	5.65147e+06	6.81924e+06	145574	113837	120184	47692.4	100074	273985	3.11074e+06	4.47105e+06	4.26936e+06	C02480	ko01100
Hayp001671	435.14	273.09	434.132	C20H22N2O9	[M+H]+	glucodichotomine B	glucodichotomine B	Alkaloids	生物碱	Alkaloids	生物碱	-	3	4.99842e+06	2.58115e+06	5.32181e+06	405171	674199	638128	54865	187543	202118	1.80061e+06	2.31645e+06	1.6322e+06	-	-
Lmgn001670	137.03	108.02	138.032	C7H6O3	[M-H]-	Salicylic acid	水杨酸	Phenolic acids	酚酸类	Phenolic acids	酚酸类	69-72-7	3	184030	147200	128581	239847	403829	123337	89062.3	110694	54362	100093	119326	145462	C00805	ko00996,ko01100,ko01110,ko04075
mws1089	421.08	241.01	422.082	C12H23O14P	[M-H]-	Sucrose-6-phosphate	蔗糖-6-磷酸	Others	其它类	Saccharides	糖类	-	3	51557.1	110012	68242.7	103815	136421	124568	56783.2	78671.3	70802.7	43944.5	63905	59356	-	-
Hmcp009963	180.14	123.07	180.138	C11H18NO+	[M]+	Candicine	N-甲基大麦芽碱	Alkaloids	生物碱	Phenolamine	酚胺	6656-13-9	1	1.31818e+06	1.17608e+06	1.86578e+06	1.20127e+06	1.26413e+06	248992	271024	459841	331079	480860	695038	556409	C10575	-
Hajp003819	291.09	139.04	290.079	C15H14O6	[M+H]+	rhusopolyphenol F	rhusopolyphenol F	Phenolic acids	酚酸类	Phenolic acids	酚酸类	1445784-13-3	3	1.76543e+06	4.65449e+06	660985	4.06302e+06	4.05265e+06	4.02289e+06	3.26214e+06	3.54951e+06	2.56361e+06	2.53277e+06	1.8886e+06	2.75685e+06	-	-
Qagp003587	219.15	131.05	218.142	C13H18N2O	[M+H]+	N-Monocinnamoylputrescine	N-单肉桂酰基腐胺	Alkaloids	生物碱	Phenolamine	酚胺	-	2	102825	45303.5	101091	66649.1	55610.3	32753.5	23937.3	29212.4	29037.1	57471.6	41941.4	42192.4	-	-
mws0847	150.08	133.05	149.07	C6H7N5	[M+H]+	1-Methyladenine	1-甲基腺嘌呤	Nucleotides and derivatives	核苷酸及其衍生物	Nucleotides and derivatives	核苷酸及其衍生物	5142-22-3	3	32437.9	17997.5	23871.7	35851.5	110865	25883.8	81557.2	13913.9	15824.1	26253.4	38172.6	35708.1	C02216	-
Lmdn000248	827.27	665.22	828.275	C30H52O26	[M-H]-	Verbascose	毛蕊花糖	Others	其它类	Saccharides	糖类	546-62-3	1	16045.2	19847.1	56798.3	57912.9	40539.1	48748.1	31143.5	48112.2	72522.3	26440.3	38824.2	33022.6	C08252	-
HJAP048	213.07	195.07	212.069	C10H12O5	[M+H]+	2,4,5-Trimethoxybenzoic acid	2,4,5-三甲氧基苯甲酸	Phenolic acids	酚酸类	Phenolic acids	酚酸类	-	3	147524	16734.1	41244.4	63130.6	15524.4	2657.08	4479.21	2984.65	8419.14	182934	125150	168632	-	-
pme2165	155.01	111.02	156.017	C5H4N2O4	[M-H]-	Orotic acid (Vitamin B13)	乳清酸 (维生素 B13)	Others	其它类	Vitamin	维生素	65-86-1	3	39835.3	16034.2	31038.5	66801	49703.8	66143.5	34808.1	32256.1	25256.2	29140.6	42805.3	35771.1	C00295	ko00240,ko01100,ko01240
mws2523	421.08	241.01	422.082	C12H23O14P	[M-H]-	Trehalose 6-phosphate	海藻糖-6-磷酸	Others	其它类	Saccharides	糖类	4484-88-2	3	20613	42057.8	9274.25	12397.6	69602.4	55840.9	16808.3	7047.58	33894.2	24521	17632.2	25561.1	C00689	ko00500,ko01100,ko01110
pme1474	298.1	136.06	297.09	C11H15N5O3S	[M+H]+	5'-Deoxy-5'-(methylthio)adenosine	5-脱氧-5-甲硫腺苷	Nucleotides and derivatives	核苷酸及其衍生物	Nucleotides and derivatives	核苷酸及其衍生物	2457-80-9	1	4.22419e+06	2.45204e+06	2.93579e+06	2.596e+06	1.98364e+06	1.73237e+06	5.18969e+06	2.55433e+06	3.49397e+06	4.20801e+06	6.19201e+06	5.18382e+06	C00170	ko00270,ko00908,ko01100
Smcp001137	188.07	118.06	187.063	C11H9NO2	[M+H]+	naphthisoxazol A	naphthisoxazol A	Alkaloids	生物碱	Alkaloids	生物碱	-	3	1.00569e+07	1.27229e+07	1.25353e+06	4.92798e+06	2.21579e+07	5.45505e+06	1.10521e+07	1.95096e+06	1.6496e+06	7.41004e+06	7.74603e+06	5.3353e+06	-	-
Lmqp002170	773.21	449.11	772.206	C33H40O21	[M+H]+	Kaempferol-3-O-sophorotrioside	山柰酚-3-O-槐三糖苷	Flavonoids	黄酮	Flavonols	黄酮醇	80714-53-0	2	218887	76071	435804	535280	290211	190742	411434	353784	328597	248020	357498	278892	C12635	ko00944,ko01110
HJN003	385.11	223.06	386.121	C17H22O10	[M-H]-	1-O-Sinapoyl-β-D-glucose	1-O-芥子酰-D-葡萄糖	Phenolic acids	酚酸类	Phenolic acids	酚酸类	-	3	14412.4	8271.64	17164.1	5079.16	12589.1	10327.9	3288.17	6569.32	3094.7	16366	13411.2	19737.4	C01175	ko00940,ko01110
pme0519	341.11	119.03	342.116	C12H22O11	[M-H]-	D-Sucrose	D-蔗糖	Others	其它类	Saccharides	糖类	57-50-1	1	2.08358e+06	3.5921e+06	1.15965e+06	824080	1.03602e+06	612724	2.18813e+06	1.16385e+06	700831	2.42537e+06	2.02373e+06	2.97109e+06	C00089	ko00052,ko00500,ko01100,ko01110,ko02010
Lskp211422	659.36	335.26	658.356	C33H54O13	[M+H]+	Intergristerone A-22-O-galactoside (Sileneoside C)	Intergristerone A-22-O-galactoside (Sileneoside C)	Steroids	甾体	Steroidal saponins	甾体皂苷	83207-65-2	2	12343.4	11019.5	9344.36	6406.15	7376.51	8957.61	10153.7	4807.72	8499.6	16601.8	21678.7	15155.1	-	-
Lmhp010099	570.36	184.07	569.348	C30H52NO7P	[M+H]+	LysoPC 22:5*	溶血磷脂酰胆碱 22:5*	Lipids	脂质	LPC	溶血磷脂酰胆碱	-	3	7369.49	544.144	2492.89	10990.3	3073.4	3432.38	1317.08	2133.48	3265.49	5810.05	5294.67	3941.79	-	-
Zajp007311	373.13	343.08	372.121	C20H20O7	[M+H]+	3',4',5',5,7-Pentamethoxyflavone*	3',4',5',5,7-五甲氧基黄酮*	Flavonoids	黄酮	Flavones	黄酮	53350-26-8	1	5017.32	33221.7	6758.37	33573.9	4680	14131	1070	66605	8164.31	19500.4	27342	20270.5	-	-
mws0267	105.02	105.02	106.027	C3H6O4	[M-H]-	DL-Glyceric Acid	DL-甘油酸	Organic acids	有机酸	Organic acids	有机酸	473-81-4	3	33249.1	31516.6	62029.7	39951	21462.2	29191.1	57947.9	68100.8	50182.3	52351.9	44724.4	65449.6	C00258	ko00030,ko00260,ko00561,ko00630,ko01100,ko01110,ko01200
mws1080	341.11	179.06	342.116	C12H22O11	[M-H]-	Galactinol	肌醇半乳糖苷	Others	其它类	Saccharides	糖类	3687-64-7	1	4.86e+06	9.86117e+06	2.34301e+06	1.39986e+06	3.35374e+06	2.62382e+06	3.78383e+06	4.48111e+06	2.84382e+06	6.0644e+06	4.81915e+06	4.14917e+06	C01235	ko00052,ko01100
pmb0786	180.09	163.06	179.079	C6H13NO5	[M+H]+	D-Glucosamine	D-氨基葡萄糖	Others	其它类	Saccharides	糖类	3416-24-8	3	1.15847e+06	1.20829e+06	1.07447e+06	1.70633e+06	1.77167e+06	1.47841e+06	754722	909431	1.0387e+06	1.28912e+06	866834	1.11758e+06	C00329	ko00520,ko01100,ko01250
HJN069	575.12	449.09	576.127	C30H24O12	[M-H]-	Tetrahydroxyflavan-(4α-8-epicatechin)	四羟基黄烷酮-(4α-8-表儿茶素)	Flavonoids	黄酮	Flavanols	黄烷醇类	-	2	493441	868406	647331	4.68498e+06	1.54166e+06	3.84151e+06	2.96538e+06	4.25848e+06	1.7882e+06	834447	934011	628489	-	-
Zmhn004909	477.06	169.01	478.075	C21H18O13	[M-H]-	3,4-Digalloylshikimic acid	3,4-二没食子酰莽草酸	Phenolic acids	酚酸类	Phenolic acids	酚酸类	-	3	7845.36	17487	8346.75	87116.3	42017.8	42173.5	12091.4	19196.9	13324.7	25726	21395.3	17329.9	-	-
pme2758	162.04	144.03	163.048	C5H9NO5	[M-H]-	4-Hydroxy-L-glutamic acid	4-羟基-L-谷氨酸	Amino acids and derivatives	氨基酸及其衍生物	Amino acids and derivatives	氨基酸及其衍生物	3913-68-6	3	12133.3	25324.1	9490.16	18117.8	20140.8	16973.1	10802	11854.7	6134.34	22697.2	15854.1	17131.8	C03079	-
mws0470	117.02	73.03	118.027	C4H6O4	[M-H]-	Methylmalonic acid	甲基丙二酸	Organic acids	有机酸	Organic acids	有机酸	516-05-2	3	4.33704e+06	4.68693e+06	2.6044e+07	2.03827e+07	2.37319e+07	1.23934e+07	3.16853e+07	1.22081e+07	1.25493e+07	1.11548e+07	1.64863e+07	1.54999e+07	C02170	ko00240,ko00280,ko00640,ko01100
pmp000236	565.16	367.1	564.148	C26H28O14	[M+H]+	Isovitexin-8-O-xyloside	异牡荆素-8-O-木糖苷	Flavonoids	黄酮	Flavones	黄酮	-	2	17511.4	155651	85862.8	105366	95795.8	15451.1	1988.14	5404.67	14501.2	142472	165679	110709	-	-
Lmsp102910	487.34	423.32	486.334	C30H46O5	[M+H]+	3-Hydroxyolean-12-ene-27,28-dioic acid (Cincholic acid)	3-羟基齐墩果-12-烯-27,28-二酸 (金鸡勒酸)	Terpenoids	萜类	Triterpene	三萜	5948-32-3	2	241240	158442	245794	358941	160552	106898	70606.2	68448.1	33319.2	184576	124198	149332	-	-
MWS2040	94.98	79.96	95.9881	CH4O3S	[M-H]-	Methanesulfonic acid	甲基磺酸	Organic acids	有机酸	Organic acids	有机酸	75-75-2	3	149555	104105	98176.1	94354.9	134171	104805	59493.7	119103	73745.7	59442.4	88045.4	70089.5	C11145	ko00920,ko01100
mws0018	203.22	84.08	202.216	C10H26N4	[M+H]+	Spermine	精胺	Alkaloids	生物碱	Alkaloids	生物碱	71-44-3	3	1.16424e+07	1.12374e+07	1.4268e+07	1.16294e+07	1.12844e+07	1.11983e+07	2.1764e+07	1.49293e+07	1.43211e+07	1.39603e+07	2.0794e+07	1.93442e+07	C00750	ko00330,ko00410,ko00480,ko00770,ko01100,ko01240
mws0232	377.15	243.09	376.138	C17H20N4O6	[M+H]+	Riboflavin (Vitamin B2)	核黄素 (维生素 B2)	Others	其它类	Vitamin	维生素	83-88-5	1	82024.8	64514.6	96627.2	145705	97791.2	123622	50881.5	109215	99668.7	105207	157721	131501	C00255	ko00740,ko01100,ko01110,ko01240,ko02010
HJN055	435.13	273.08	436.137	C21H24O10	[M-H]-	Dihydrocharcone-4'-O-glucoside	二氢查耳酮-4'-O-葡萄糖苷	Flavonoids	黄酮	Chalcones	查耳酮	-	2	73962.8	163727	55301.3	216105	212378	248524	112379	182391	159642	105202	98709.6	141402	-	-
pme1598	463.12	301.07	464.132	C22H24O11	[M-H]-	Hesperetin-5-O-glucoside	橙皮素-5-O-葡萄糖苷	Flavonoids	黄酮	Flavanones	二氢黄酮	69651-80-5	2	121217	175713	54636.1	909784	1.1737e+06	1.75983e+06	132275	292079	220413	208350	287366	204373	-	-
MWStz170	227.14	86.06	226.132	C11H18N2O3	[M+H]+	Cyclo(L-Leu-trans-4-hydroxy-L-Pro)	环(L-亮氨酸-反-4-羟基-L-脯氨酸)	Amino acids and derivatives	氨基酸及其衍生物	Amino acids and derivatives	氨基酸及其衍生物	115006-86-5	3	1404.86	14320.5	7586.27	6667.43	3896.63	8434.51	24348.4	13504.1	13017.4	13081.9	18507.5	19475.8	-	-
Lmgn000224	145.01	57.03	146.022	C5H6O5	[M-H]-	2-Methyl-3-oxosuccinic acid	2-甲基-3-氧代琥珀酸	Organic acids	有机酸	Organic acids	有机酸	-	3	38560.4	64342.8	48129.2	101791	71201.8	72198.5	56545.7	70141.8	88256.8	26343.2	39937.1	35422.3	C06030	ko00660
Lmhp011562	353.27	261.22	352.261	C21H36O4	[M+H]+	1-α-Linolenoyl-glycerol*	1-α-亚麻酸甘油酯*	Lipids	脂质	Glycerol ester	甘油酯	-	1	42879.5	34341.7	36451.2	21121	19641.4	15744	24021.4	10879.4	11101.5	24632.7	26857.9	35977.7	-	-
Lmdp003509	435.09	303.06	434.085	C20H18O11	[M+H]+	Quercetin-3-O-xyloside (Reynoutrin)*	槲皮素-3-O-木糖苷 (瑞诺苷)*	Flavonoids	黄酮	Flavonols	黄酮醇	549-32-6	3	72148.6	145072	54029.7	307501	176160	354983	126084	136443	216268	120990	104512	79276	-	-
mws0255	112.05	95.02	111.043	C4H5N3O	[M+H]+	Cytosine	胞嘧啶	Nucleotides and derivatives	核苷酸及其衍生物	Nucleotides and derivatives	核苷酸及其衍生物	71-30-7	3	386707	291130	433555	418781	722099	370096	300939	251455	261449	186697	285119	250685	C00380	ko00240,ko01100,ko01232
pmb2799	295.23	195.14	296.235	C18H32O3	[M-H]-	12,13-Epoxy-9-Octadecenoic Acid	12,13-环氧-9-十八碳烯酸	Lipids	脂质	Free fatty acids	游离脂肪酸	6799-85-5	2	11355.4	12956.2	12430.8	29660.8	17944.4	11865.6	7058.05	10085.5	9149.61	17447.9	17011.3	11701.2	C14826	ko00591,ko01100
pme0278	191.1	128.07	190.095	C7H14N2O4	[M+H]+	2,6-Diaminooimelic acid	2,6-二氨基庚二酸	Organic acids	有机酸	Organic acids	有机酸	583-93-7	3	219928	68498.1	264557	292636	182825	36886.9	24149.4	21389.2	27129.5	53247.3	53551.4	75342.9	C00666	ko00300,ko00470,ko01100,ko01110,ko01230
Lmhp009682	570.36	184.07	569.348	C30H52NO7P	[M+H]+	LysoPC 22:5(2n isomer)*	溶血磷脂酰胆碱 22:5(2n异构)*	Lipids	脂质	LPC	溶血磷脂酰胆碱	-	3	7135.09	1214.95	2054.72	13601.5	3980.24	2342.78	1527.92	1655.32	2360.49	5093.21	3511.81	3721.7	-	-
pme1261	206.14	76.08	205.131	C9H19NO4	[M+H]+	D-Panthenol	D-泛酰醇	Others	其它类	Saccharides	糖类	81-13-0	3	10030	18049.7	10270.4	11669.6	7079.01	30714.6	9242.56	22292.7	7266.93	8242.11	11791.1	8467.9	C05944	ko00770
pmb0680	741.2	147.3	740.195	C36H36O17	[M+H]+	Vitexin-7-O-(6''-p-coumaroyl)glucoside	牡荆素-7-O-(6''-对香豆酰)葡萄糖苷	Flavonoids	黄酮	Flavones	黄酮	-	3	50289.8	26140.9	18446.7	29445.7	90715.4	34246.9	16919.1	902.476	6927.07	32771.2	22118.1	32689.9	-	-
pme2559	174.04	88.04	175.048	C6H9NO5	[M-H]-	N-Acetyl-L-Aspartic Acid	N-乙酰-L-天冬氨酸	Amino acids and derivatives	氨基酸及其衍生物	Amino acids and derivatives	氨基酸及其衍生物	997-55-7	3	192364	176266	287593	127258	185224	109141	118799	150246	49343.5	72210.9	107216	107101	C01042	ko00250,ko01100
Zmgn000447	184.98	78.96	185.993	C3H7O7P	[M-H]-	3-Phospho-D-glyceric acid	3-磷酸-D-甘油酸	Others	其它类	Saccharides	糖类	820-11-1	3	86644.1	209771	250304	146537	129418	187153	107594	99408.7	121905	93620.5	128683	144115	C00197	ko00010,ko00030,ko00260,ko00270,ko00561,ko00630,ko00710,ko01100,ko01110,ko01200,ko01230,ko01240
Lszp210010	325.14	191.08	324.132	C15H20N2O6	[M+H]+	Tatarine	Tatarine	Alkaloids	生物碱	Alkaloids	生物碱	-	1	168397	975578	40828.4	195505	709727	132540	82611.8	66870.1	380594	463924	408321	300832	-	-
mws2186	435.09	303.05	434.085	C20H18O11	[M+H]+	Avicularin(Quercetin-3-O-α-L-arabinofuranoside)*	扁蓄苷(广寄生苷)*	Flavonoids	黄酮	Flavonols	黄酮醇	572-30-5	3	49690.7	104136	56619.8	192809	168023	252311	77067.5	124495	115354	107009	85481.8	70039	-	-
mws0072	433.11	271.06	432.106	C21H20O10	[M+H]+	Apigenin-5-O-glucoside	芹菜素-5-O-葡萄糖苷	Flavonoids	黄酮	Flavones	黄酮	28757-27-9	2	4.00369e+06	648479	5.21744e+06	2.56043e+06	1.22475e+06	1.38282e+06	888244	283966	1.10566e+06	3.42263e+06	4.53889e+06	3.02818e+06	-	-
Lhfp112926	343.15	163.08	342.147	C20H22O5	[M+H]+	Myricatomentogenin	Myricatomentogenin	Others	其它类	Others	其它	-	3	14975.2	23129.6	16031.8	25553.4	11138.3	8448.51	14861	14911.4	12246.8	11575	17644.4	16800.9	-	-
mws4177	152.07	120.04	151.063	C8H9NO2	[M+H]+	Methyl Anthranilate	邻氨基苯甲酸甲酯	Phenolic acids	酚酸类	Phenolic acids	酚酸类	134-20-3	3	165318	38785	85335.1	62079	38668.9	11439.8	8196.45	11754.3	6778.72	35798.5	54065.4	41207.5	C20634	-
pmb0464	458.15	116.03	457.143	C16H27NO14	[M+H]+	L-Aspartic acid-O-diglucoside	L-天冬氨酸-O-二葡萄糖苷	Amino acids and derivatives	氨基酸及其衍生物	Amino acids and derivatives	氨基酸及其衍生物	-	3	1.14052e+06	787517	530876	1.18627e+06	4.47611e+06	1.71792e+06	803729	1.12359e+06	1.19804e+06	7.54596e+06	1.14033e+07	1.11375e+07	-	-
HJN104	481.14	319.08	482.106	C21H22O13	[M-H]-	Dihydromyricetin-3-O-glucoside	二氢杨梅素-3-O-葡萄糖苷	Flavonoids	黄酮	Flavanonols	二氢黄酮醇	-	3	29829.6	25842.7	29973.8	27792.2	18556.3	23249.8	25422	8053.11	14399.3	9051.96	13340.9	13718.1	-	-
Lahp003793	435.13	147.04	434.121	C21H22O10	[M+H]+	Tadehaginoside(iso-01)	葫芦茶苷(iso-01)	Phenolic acids	酚酸类	Phenolic acids	酚酸类	-	1	81261.3	111414	38843.6	195287	59878.7	19520	13743.2	13750	22108.6	92077.3	59143.4	78567.6	-	-
Wmkp002590	595.19	127.04	594.159	C27H30O15	[M+H]+	5,7-Dihydroxy-4-methoxyflavone-3-O-xylose-(1-6)-glucose	5,7-二羟基-4-甲氧基黄酮-3-O-木糖-(1-6)-葡萄糖	Flavonoids	黄酮	Flavones	黄酮	-	2	747964	1.16601e+06	2.70619e+06	3.93999e+06	5.98514e+06	4.92542e+06	1978896	5.55344e+06	5.17394e+06	1.11224e+06	1.31213e+06	1.70079e+06	-	-
Lmzp002365	465.14	303.09	464.132	C22H24O11	[M+H]+	Hesperetin-7-O-glucoside	橙皮素-7-O-葡萄糖苷	Flavonoids	黄酮	Flavanones	二氢黄酮	31712-49-9	2	71417.4	47495.3	73717.4	19151	40856.4	39375.4	18732.7	35212.4	8037.82	26161.6	19189.9	30010.1	C16422	ko00941
Lmzn001582	387.17	207.1	388.173	C18H28O9	[M-H]-	5'-Glucosyloxyjasmanic acid	5'-葡萄糖基氧代茉莉酸	Phenolic acids	酚酸类	Phenolic acids	酚酸类	-	1	149334	53725.6	42474.2	6087.71	15239.5	11183.7	4075.9	16043.2	3921.64	34850.1	41549.6	53667	-	-
mws0126	524.37	184.07	523.364	C26H54NO7P	[M+H]+	LysoPC 18:0	溶血磷脂酰胆碱 18:0	Lipids	脂质	LPC	溶血磷脂酰胆碱	19420-57-6	1	625932	438062	228030	1.22119e+06	1.87573e+06	1.21014e+06	1.12193e+06	1.14004e+06	824119	817494	1.05615e+06	684638	-	-
Lskp211425	427.36	165.09	426.35	C29H46O2	[M+H]+	Stigmast-4-ene-3,6-dione	豆甾烷-4-烯-3,6-二酮	Steroids	甾体	Steroid	甾体	23670-94-2	2	633129	585077	497983	543994	401369	366807	123820	295197	304994	234852	369193	312108	-	-
pme0257	111.02	67.03	112.027	C4H4N2O2	[M-H]-	Uracil	尿嘧啶	Nucleotides and derivatives	核苷酸及其衍生物	Nucleotides and derivatives	核苷酸及其衍生物	66-22-8	3	9322.69	18766.7	41134.9	13443.6	14868.4	6020.7	56709.6	34761.1	15631.5	19495.1	17615.4	26498.6	C00106	ko00240,ko00410,ko00770,ko01100,ko01232
HJN093	451.09	313.05	452.096	C20H20O12	[M-H]-	2-O-Salicyl-6-O-Galloyl-D-Glucose	2-O-水杨酰-6-O-没食子酰-D-葡萄糖	Phenolic acids	酚酸类	Phenolic acids	酚酸类	-	3	11933.3	9252.73	9567.55	14016.8	9303.29	10586.3	6376.61	11642.7	5910.45	9082.21	9215.73	13167.9	-	-
Zjgp101330	825.42	469.33	824.419	C42H64O16	[M+H]+	glabric acid-GlcA-Glc	光甘草酸-葡萄糖醛酸基-葡萄糖苷	Terpenoids	萜类	Triterpene Saponin	三萜皂苷	-	2	132775	87665.3	52064.4	72009.7	63898.5	49175.5	53253.1	38048.8	24637.9	53193	75348.4	51557	-	-
mws2368	137.06	119.05	138.068	C8H10O2	[M-H]-	Tyrosol; 4-Hydroxyphenylethanol	酪醇; 对羟基苯乙醇	Phenolic acids	酚酸类	Phenolic acids	酚酸类	501-94-0	3	26168.8	20143.5	20378.2	39773.2	43483.4	11771.8	16469.5	17306.9	10340.3	18225.6	12212.7	18785.3	C06044	ko00350,ko01100
Lazp003665	525.19	525.2	524.189	C25H32O12	[M+H]+	Nagilactone C glucoside	竹柏内酯C葡萄糖苷	Terpenoids	萜类	Ditepenoids	二萜	-	2	2.42731e+06	3.64418e+06	1.51807e+06	2.26643e+06	2.55776e+06	2.43452e+06	350360	1.26107e+06	724150	1.90971e+06	1.38005e+06	1.27556e+06	-	-
Lmbp002592	611.16	287.05	610.153	C27H30O16	[M+H]+	Kaempferol-3,7-O-diglucoside	山柰酚-3,7-O-双葡萄糖苷	Flavonoids	黄酮	Flavonols	黄酮醇	25615-14-9	3	893750	163024	542104	194064	256366	121327	125676	87724.8	97239.9	219438	322051	226597	-	-
Smgp104547	547.23	385.17	546.221	C27H34N2O10	[M+H]+	3β-Isodihydrocadambine	3β-异二氢卡丹宾碱	Alkaloids	生物碱	Plumerane	吲哚类生物碱	62014-69-1	2	109605	57314.6	29115.8	15441.7	42315	56353.7	14325.9	6628.22	8627.29	34503.1	54605.9	49038.3	-	-
Lskp211403	287.07	227.05	286.059	C14H10N2O5	[M+H]+	siliendines B	siliendines B	Alkaloids	生物碱	Alkaloids	生物碱	-	1	1.16668e+07	179003	2.95945e+06	9.59471e+06	984495	398922	333330	173771	927692	3.0666e+06	4.53523e+06	3.19819e+06	-	-
mws0361	253.22	235.21	254.225	C16H30O2	[M-H]-	Palmitoleic Acid	棕榈油酸	Lipids	脂质	Free fatty acids	游离脂肪酸	373-49-9	1	11962.1	22033.8	44451.6	29935.4	11218.8	8303.12	10448.9	7010.05	12296.3	8060.45	12072.2	12562.9	C08362	ko00061,ko01100
Lmmn000214	487.17	341.11	488.174	C18H32O15	[M-H]-	Solatriose	茄三糖	Others	其它类	Saccharides	糖类	528-40-5	3	67436.3	43814.6	24787.7	12622.8	137938	55567.2	883200	128054	48654.2	178761	120129	126326	-	-
Cmhp005227	339.11	177.05	338.1	C16H18O8	[M+H]+	4,8-Dihydroxy Naphthol-1-O-glucoside	4,8-二羟基萘酚-1-O-葡萄糖苷	Quinones	醌类	Quinones	醌类	-	2	664208	247791	499274	192139	241617	119614	116586	143750	132293	385878	460400	288299	-	-
pme2493	579.17	287.06	578.164	C27H30O14	[M+H]+	Kaempferol-3,7-O-dirhamnoside (Kaempferitrin)	山柰酚-3,7-O-二鼠李糖苷 (山柰苷)	Flavonoids	黄酮	Flavonols	黄酮醇	482-38-2	3	4031.03	44004.7	2569.1	35810.3	43082.5	76960.8	24304.6	16709.6	12977.8	38232.2	24154.9	30250.8	C16981	-
pmb3101	175.06	115.04	176.069	C7H12O5	[M-H]-	2-Isopropylmalic Acid	2-异丙基苹果酸	Organic acids	有机酸	Organic acids	有机酸	49601-06-1	3	17595.2	34870.6	81095.1	54591.7	39372.8	37118.3	70955.1	14793.5	15579	19187.8	21436.4	29370.3	C02504	ko00290,ko00620,ko01100,ko01110,ko01210,ko01230
pme2292	89.11	72.08	88.1	C4H12N2	[M+H]+	Putrescine	腐胺	Alkaloids	生物碱	Alkaloids	生物碱	110-60-1	3	56393.3	52123.8	75008.9	106394	27951.7	50844.5	254571	37460.2	239183	42040.7	67312.8	56166	C00134	ko00330,ko00470,ko00480,ko00960,ko01100,ko01110,ko02010
mws1090	259.02	96.97	260.03	C6H13O9P	[M-H]-	Glucose-1-phosphate*	葡萄糖-1-磷酸*	Others	其它类	Saccharides	糖类	59-56-3	2	802021	835821	618429	408066	419800	676027	230325	161175	327250	733749	925209	1.16522e+06	C00103	ko00010,ko00040,ko00052,ko00500,ko00520,ko00523,ko00561,ko01100,ko01110,ko01240,ko01250
pmb0711	611.16	303.05	610.153	C27H30O16	[M+H]+	Quercetin-7-O-rutinoside*	槲皮素-7-O-芸香糖苷*	Flavonoids	黄酮	Flavonols	黄酮醇	147714-62-3	3	4223.43	16848.8	28729.1	25000.1	83078.4	36672.2	16886.7	48840.5	17329.9	34694.9	38754.5	24248.2	-	-
mws0612	195.07	121.03	196.074	C10H12O4	[M-H]-	3,4-Dimethoxyphenyl acetic acid	3,4-二甲氧基苯乙酸	Phenolic acids	酚酸类	Phenolic acids	酚酸类	93-40-3	1	96902.5	113820	70744.6	63322	104720	61079.6	67223.7	70821.3	89127	63865.5	97779.4	70878.9	-	-
Lmnp102580	565.16	433.11	564.148	C26H28O14	[M+H]+	Apigenin-6-C-(2''-xylosyl)glucoside	芹菜素-6-C-(2''-木糖基)葡萄糖苷	Flavonoids	黄酮	Flavones	黄酮	-	3	93366.1	471426	416057	479446	1.10851e+06	244291	11377.1	41590.5	30242.5	384609	477987	298766	-	-
Zjgp101310	647.38	453.34	646.372	C36H54O10	[M+H]+	glycyrrhetic acid monoglucuronide	单葡萄糖醛酸基甘草次酸	Terpenoids	萜类	Triterpene Saponin	三萜皂苷	34096-83-8	2	191719	147047	146401	355019	192023	60562.1	103737	44459.1	91605.2	76574.6	123538	104708	-	-
pme0124	173.09	116.07	172.085	C7H12N2O3	[M+H]+	L-Glycyl-L-proline	L-甘氨酰-L-脯氨酸	Amino acids and derivatives	氨基酸及其衍生物	Amino acids and derivatives	氨基酸及其衍生物	704-15-4	3	252822	124392	129546	428513	166487	99115.9	162723	68052.9	533318	324268	487180	341298	-	-
mws0609	344.04	150.04	345.047	C10H12N5O7P	[M-H]-	Guanosine 3',5'-cyclic monophosphate	鸟苷 3',5'-环单磷酸	Nucleotides and derivatives	核苷酸及其衍生物	Nucleotides and derivatives	核苷酸及其衍生物	7665-99-8	2	214311	290013	191814	790539	1.31023e+06	1.10579e+06	260482	253943	553953	612479	511988	809872	C00942	ko00230,ko01100
pme2828	140.03	98.96	139.027	C6H5NO3	[M+H]+	4-Nitrophenol	4-硝基苯酚	Phenolic acids	酚酸类	Phenolic acids	酚酸类	100-02-7	3	1.03653e+07	1.20392e+07	1.08459e+07	1.0668e+07	1.04361e+07	1.24911e+07	8.42069e+06	9.0084e+06	1.26096e+07	8.82286e+06	7.44369e+06	1.17518e+07	C00870	-
mws0889	135.03	75.01	136.037	C4H8O5	[M-H]-	D-Threonic Acid	D-苏糖酸	Others	其它类	Saccharides	糖类	3909-12-4	3	23443.5	68017.4	144130	51852.3	88218.2	43834.4	108884	63176.7	40015.9	49185.4	37557.3	30832.7	C21649	-
mws1336	138.06	120.04	137.048	C7H7NO2	[M+H]+	4-Aminobenzoic acid	4-氨基苯甲酸	Phenolic acids	酚酸类	Phenolic acids	酚酸类	150-13-0	3	29284.7	30406.8	47630.4	26494.3	33512.8	23576.1	49951	34430.9	15610.3	23314.8	24206.1	35066.4	C00568	ko00790,ko01100,ko01240
mws2125	166.98	78.96	167.982	C3H5O6P	[M-H]-	Phosphoenolpyruvate	磷酸烯醇式丙酮酸	Organic acids	有机酸	Organic acids	有机酸	138-08-9	3	20087.7	50365.4	35025.6	50594.7	16333.3	33036.1	31561.5	27605.7	37295.5	23350.4	29460.1	37646.8	C00074	ko00010,ko00020,ko00400,ko00440,ko00620,ko00710,ko00996,ko00999,ko01100,ko01110,ko01200,ko01230,ko01240
mws0009	179.07	91.06	178.063	C10H10O3	[M+H]+	Coniferaldehyde	松柏醛	Phenolic acids	酚酸类	Phenolic acids	酚酸类	20649-42-7	1	118608	64715	94520.9	79171.8	125037	36054.6	23370.6	35422.1	22083.7	97496.7	131298	82973.3	C02666	ko00940,ko01100,ko01110
Lhmp100802	809.43	453.34	808.424	C42H64O15	[M+H]+	Dehydrosoyasaponin I glucuronic acid glucoside(iso-02)	脱氢大豆皂苷元I葡萄糖醛酸葡萄糖苷(iso-02)	Terpenoids	萜类	Triterpene Saponin	三萜皂苷	-	1	937757	849005	1.11455e+06	4.0272e+06	1.01393e+06	210053	187357	186734	203413	342656	557287	443567	-	-
Lskp211482	471.35	205.16	470.34	C30H46O4	[M+H]+	19-Hydroxy-3-oxo-24-norolean-12-en-28-oic acid(ISO1)	19-羟基-3-氧代-24-去甲基齐墩果-12-烯-28-酸(ISO1)	Terpenoids	萜类	Triterpene	三萜	-	2	1.81501e+06	1.68583e+06	1.555e+06	1.66865e+06	1.2963e+06	1.14044e+06	1.4276e+06	1.46281e+06	1.65033e+06	935454	1.51609e+06	1.18826e+06	-	-
pme2125	503.16	179	504.169	C18H32O16	[M-H]-	Raffinose	棉子糖	Others	其它类	Saccharides	糖类	512-69-6	3	6.41058e+06	1.07815e+07	6.2149e+06	2.38642e+06	3.58069e+06	6.23952e+06	5.56023e+06	6.11966e+06	8.82428e+06	3.42538e+06	4.7735e+06	5.62001e+06	C00492	ko00052,ko01100,ko02010
Lacp004368	475.21	209.15	474.21	C22H34O11	[M+H]+	Blumenol B malonyl Glucoside	布卢门醇 B 丙二酰葡萄糖苷	Terpenoids	萜类	Sesquiterpenoids	倍半萜	-	2	13568.2	4022.47	6851.96	25997.8	20761.9	13331.5	9	11010.6	12958.3	15831.2	19250.5	25400	-	-
Lmmp007156	825.43	469.33	824.419	C42H64O16	[M+H]+	Ceanothic acid-3-O-glucuronic acid-glucose	美洲茶酸-3-O-葡萄糖醛酸-葡萄糖	Terpenoids	萜类	Triterpene Saponin	三萜皂苷	-	1	2.55533e+06	4.03316e+06	3.50733e+06	3.45625e+06	3.04399e+06	953798	1.55378e+06	1.26667e+06	1.17597e+06	1.2467e+06	1.89472e+06	2.01782e+06	-	-
pmn001710	521.13	359.08	522.137	C24H26O13	[M-H]-	Rosmarinic acid-3'-O-glucoside	迷迭香酸-3'-O-葡萄糖苷	Phenolic acids	酚酸类	Phenolic acids	酚酸类	910028-78-3	2	249659	63560.6	101899	22605.5	114225	76792.6	17612	10534	13518.1	116629	74345.6	84264.4	-	-
Lmpp003465	481.1	319.04	480.09	C21H20O13	[M+H]+	Myricetin-3-O-β-D-glucoside	杨梅素-3-O-β-D-葡萄糖苷	Flavonoids	黄酮	Flavonols	黄酮醇	19833-12-6	3	97913.3	92830	56883.9	63106.3	180824	90757.9	24942.5	31107.8	30135	33697.1	50535.6	34353.1	-	-
Hmmp003156	595.16	313.07	594.159	C27H30O15	[M+H]+	Isovitexin-7-O-glucoside(Saponarin)	异牡荆素-7-O-葡萄糖苷 (皂草苷)	Flavonoids	黄酮	Flavones	黄酮	20310-89-8	3	59588.3	26854	14074.2	584239	744607	70083.3	27396.5	46138.5	7561.3	87533	109942	67307.7	C08064	-
MWSmce549	303.25	57.07	302.246	C17H34O4	[M+H]+	1-Monomyristin	1-肉豆蔻酸单甘油酯	Lipids	脂质	Free fatty acids	游离脂肪酸	589-68-4	3	728614	881031	1.16784e+06	658384	789756	455937	931556	646371	999878	464681	394491	280678	-	-
Lsjp211253	301.21	255.21	300.209	C20H28O2	[M+H]+	Sugiol	柳杉酚	Terpenoids	萜类	Ditepenoids	二萜	511-05-7	2	294730	42441.6	958496	1.16211e+06	186436	16788.7	29209.4	209094	851831	375731	623274	551622	C21822	ko00904,ko01110
mws4174	222.1	138.05	221.09	C8H15NO6	[M+H]+	N-Acetyl-D-mannosamine*	N-乙酰-D-甘露糖胺*	Others	其它类	Saccharides	糖类	7772-94-3	3	183902	320548	568595	584175	465905	447886	78761	517327	505215	153713	188420	249845	C00645	ko00520,ko01100,ko01250
Lmqp000427	146.08	82.07	145.074	C6H11NO3	[M+H]+	N-Methyl-Trans-4-Hydroxy-L-Proline	N-甲基-反式-4-羟基-L-脯氨酸	Amino acids and derivatives	氨基酸及其衍生物	Amino acids and derivatives	氨基酸及其衍生物	4252-82-8	3	146370	150756	388322	186928	175694	179254	348332	240819	297465	106590	176087	138724	-	-
Lmpp003930	579.15	271.06	578.142	C30H26O12	[M+H]+	Apigenin-7-O-(6''-p-Coumaryl)glucoside	芹菜素-7-O-(6''-对香豆酰)葡萄糖苷	Flavonoids	黄酮	Flavones	黄酮	-	3	76470.2	262034	45292.2	113628	92546.5	155567	120076	99401.4	102512	56927.6	94863.2	78764	-	-
Lmgp002595	167.07	121.03	166.063	C9H10O3	[M+H]+	4'-Hydroxy-3'-methoxyacetophenone (Acetovanillone)	4'-羟基-3'-甲氧基苯乙酮; 香草乙酮	Phenolic acids	酚酸类	Phenolic acids	酚酸类	498-02-2	1	451217	85751.9	651910	335626	164146	340279	234004	306807	270103	367122	316133	219338	C11380	-
pme2459	449.11	287.06	448.101	C21H20O11	[M+H]+	Luteolin-7-O-glucoside (Cynaroside)	木犀草素-7-O-葡萄糖苷 (木犀草苷)	Flavonoids	黄酮	Flavones	黄酮	5373-11-5	3	516828	294180	618535	721001	160196	37448.1	54322.7	32993.4	76735.4	259768	335478	431076	C03951	ko00944
Zmyn000083	338.99	78.96	339.996	C6H14O12P2	[M-H]-	D-Glucose 1,6-bisphosphate	D-葡萄糖-1,6-二磷酸	Others	其它类	Saccharides	糖类	10139-18-1	3	8077.1	4572.98	12639.4	10316	7770.99	6491.07	3464.28	6012.06	9547.47	7985.67	10854.5	6672.75	C01231	ko00500,ko01100
Lmsp004851	291.09	123.04	290.079	C15H14O6	[M+H]+	3-Hydroxyphloretin	3-羟基根皮素	Flavonoids	黄酮	Chalcones	查耳酮	57765-66-9	2	37413.6	369192	57536.4	385501	424751	128841	129099	458291	57086.1	138793	177932	230228	-	-
pme2914	161.05	99.05	162.053	C6H10O5	[M-H]-	3-Hydroxy-3-methylpentane-1,5-dioic acid	3-羟基-3-甲基谷氨酸	Amino acids and derivatives	氨基酸及其衍生物	Amino acids and derivatives	氨基酸及其衍生物	503-49-1	3	440619	783952	765459	2.55418e+06	1.78217e+06	1.96793e+06	214711	1.27869e+06	428940	583153	763784	462000	C03761	-
pme3011	104.07	69.03	103.063	C4H9NO2	[M+H]+	γ-Aminobutyric acid	γ-氨基丁酸	Organic acids	有机酸	Organic acids	有机酸	56-12-2	3	3.84394e+06	2.21845e+06	1.19289e+06	5.6251e+06	1.04751e+07	6.6272e+06	8.3803e+06	7.23344e+06	7.96281e+06	4.3291e+06	7.24559e+06	5.76809e+06	C00334	ko00250,ko00330,ko00410,ko00650,ko00760,ko01100
Lmjp002596	597.14	303.05	596.138	C26H28O16	[M+H]+	Quercetin-3-O-sambubioside	槲皮素-3-O-桑布双糖苷	Flavonoids	黄酮	Flavonols	黄酮醇	83048-35-5	3	21487.4	54659.3	9118.25	53137.1	27728	55832.7	52645.2	27285.5	23479	38105.4	25880.5	24598.3	C12637	ko00944
MWSslk120	208.1	120.08	207.089	C11H13NO3	[M+H]+	N-Acetyl-DL-phenylalanine	N-乙酰基-DL-苯丙氨酸	Amino acids and derivatives	氨基酸及其衍生物	Amino acids and derivatives	氨基酸及其衍生物	2901-75-9	3	226569	152560	184735	189570	216597	51199.3	106544	41771.4	60511	96673	156091	112455	-	-
pmb0962	235.17	118.09	234.158	C10H22N2O4	[M+H]+	L-Lysine-Butanoic Acid	L-赖氨酸丁酸酯	Amino acids and derivatives	氨基酸及其衍生物	Amino acids and derivatives	氨基酸及其衍生物	80407-71-2	3	5522.99	6398.3	28892.5	9	28685.9	1582.46	55587.9	3697.2	1573.99	8429.74	12733.3	14320.8	-	-
zjmp120214	471.35	435.33	470.34	C30H46O4	[M+H]+	22-Hydroxy-oleanonic acid	22-羟基齐墩果酮酸	Terpenoids	萜类	Triterpene	三萜	-	2	259121	265822	593904	617057	626102	429000	351578	216136	569411	193935	331456	281344	-	-
Qayp004737	497.31	443.28	496.304	C27H44O8	[M+H]+	Ponasterone C	松甾酮 C	Steroids	甾体	Steroid	甾体	26191-89-9	3	1053.87	15407.2	5873.41	22532.8	15718.2	15056.8	20237.2	20229.1	26227.5	13813.2	11414.1	18877.3	-	-
pmp001309	465.1	303.1	464.096	C21H20O12	[M+H]+	6-Hydroxykaempferol-7-O-glucoside	6-羟基山柰酚-7-O-葡萄糖苷	Flavonoids	黄酮	Flavonols	黄酮醇	-	1	778613	1.03148e+06	347342	6.01372e+06	5.84001e+06	7.39614e+06	1.03053e+06	1.66536e+06	1.00874e+06	948373	1.50499e+06	1.02798e+06	-	-
mws5038	341.11	89.02	342.116	C12H22O11	[M-H]-	Isomaltulose	异麦芽酮糖	Others	其它类	Saccharides	糖类	13718-94-0	3	2.51534e+06	3.65404e+06	1.02163e+06	314175	933005	677221	1.6261e+06	1.18634e+06	1.23221e+06	1.55058e+06	1.00297e+06	1.70706e+06	C01742	-
mws1299	449.11	299.05	448.101	C21H20O11	[M+H]+	Luteolin-8-C-glucoside (Orientin)	木犀草素-8-C-葡萄糖苷 (荭草素)	Flavonoids	黄酮	Flavones	黄酮	28608-75-5	3	13742.9	4929.08	13441	21552	44985.2	12596.4	8177.65	16684.4	8187	116754	136873	79698.6	C10114	-
pmb2497	197.05	153.06	198.053	C9H10O5	[M-H]-	4-Hydroxy-3-methoxymandelate	4-羟基-3-甲氧基扁桃酸	Phenolic acids	酚酸类	Phenolic acids	酚酸类	55-10-7	3	47869.6	30224.2	29074.3	43001.8	93187.3	30590.2	79465.7	30085.9	31984.2	45898.5	38685.7	63846.7	C05584	ko00350,ko01100
pme2651	742.07	620.02	743.076	C21H28N7O17P3	[M-H]-	NADP (Nicotinamide adenine dinucleotide phosphate)	烟酰胺腺嘌呤二核苷酸磷酸	Nucleotides and derivatives	核苷酸及其衍生物	Nucleotides and derivatives	核苷酸及其衍生物	53-59-8	3	186522	151291	219720	213838	232525	191533	163791	187764	182243	97607.5	163501	120876	C00006	ko00195,ko00480,ko00760,ko01100,ko01240
pmf0293	269.29	209.23	270.292	C18H38O	[M-H]-	1-Octadecanol	正十八醇	Lipids	脂质	Free fatty acids	游离脂肪酸	112-92-5	3	36953.3	28506.7	16287.8	29689.9	29878.4	17367.8	11807.5	32263.6	12437	44723.7	27988.9	30410.6	-	-
Zmbp000449	130.03	70.07	129.025	C5H7NOS	[M+H]+	Epigoitrin	表告依春	Others	其它类	Others	其它	1072-93-1	2	233026	47278.8	140015	91427	318905	91016.3	805690	141468	61384.5	534931	606844	352236	-	-
Lmjp002461	611.16	303.05	610.153	C27H30O16	[M+H]+	Quercetin-3-O-neohesperidoside*	槲皮素-3-O-新橘皮糖苷*	Flavonoids	黄酮	Flavonols	黄酮醇	117611-67-3	3	10132.4	21162.9	17343.5	51793.8	83885.9	18023.6	32231.4	47594.6	24709.8	44521.3	55003	31922.1	-	-
pme0183	152.06	135.03	151.049	C5H5N5O	[M+H]+	Isoguanine	异鸟嘌呤	Nucleotides and derivatives	核苷酸及其衍生物	Nucleotides and derivatives	核苷酸及其衍生物	3373-53-3	3	64388.2	48703.6	68024.7	77388.2	167975	51941.4	140489	41839.6	27312.2	39236.1	62093.3	67041	-	-
mws0120	258.11	104.11	257.103	C8H20NO6P	[M+H]+	Choline Alfoscerate	甘磷酸胆碱 GPC	Lipids	脂质	PC	磷脂酰胆碱	28319-77-9	3	31754.8	545405	189020	699537	288457	483655	30628.8	80888.9	113778	153062	181600	253654	C00670	ko00564,ko00565
Hmqp000191	505.18	127.03	504.169	C18H32O16	[M+H]+	Planteose	植物糖	Others	其它类	Saccharides	糖类	470-57-5	2	487591	375096	667659	545199	535323	797592	254226	731841	721483	262521	440218	431482	C03848	-
Lmmn004625	449.11	287.06	450.116	C21H22O11	[M-H]-	Dihydrokaempferol-7-O-glucoside	二氢山柰酚-7-O-葡萄糖苷	Flavonoids	黄酮	Flavanonols	二氢黄酮醇	-	3	1860.93	1717.97	3944.28	9190.31	12259.7	2673.01	2418.19	810.058	2744.57	4518.94	5827.02	3393.37	-	-
HJN086	449.11	287.06	450.116	C21H22O11	[M-H]-	Eriodictyol-3'-O-glucoside	圣草酚-3'-O-葡萄糖苷	Flavonoids	黄酮	Flavanones	二氢黄酮	-	3	1860.93	1717.97	3944.28	9190.31	12259.7	2673.01	2418.19	810.058	2744.57	4518.94	5827.02	3393.37	-	-
Hmmp004320	1091.56	455.35	1090.56	C53H86O23	[M+H]+	Saponin F	皂角苷 F	Terpenoids	萜类	Triterpene Saponin	三萜皂苷	-	3	22381.4	21186.7	18583.3	11470.3	19756.4	27425.5	16451.4	14968.3	21866.7	21939.9	18451.4	12619.9	-	-
Lhnp110102	557.18	137.06	556.179	C25H32O14	[M+H]+	10-hydroxy-oleuropein	10-羟基橄榄苦苷	Terpenoids	萜类	Monoterpenoids	倍萜	-	2	62298.5	67652.4	31951.8	25827.8	16915.1	17329.7	13764.3	26747.2	3261.48	16924.1	20318.2	11682.2	-	-
mws0045	449.11	303.05	448.101	C21H20O11	[M+H]+	Quercetin-3-O-rhamnoside(Quercitrin)	槲皮素-3-O-鼠李糖苷(槲皮苷)	Flavonoids	黄酮	Flavonols	黄酮醇	522-12-3	3	42829.3	51121.1	50035	76254.5	61900.4	69872	67086.3	78161.3	79512	95289.2	65667.4	58313.2	C01750	ko00944
MWS1912	227.16	153.13	226.157	C13H22O3	[M+H]+	Methyl dihydrojasmonate	二氢茉莉酮酸甲酯	Organic acids	有机酸	Organic acids	有机酸	24851-98-7	3	18039	13676.3	24593.9	9935.94	7177.78	2270.5	6652.99	3832.73	2338.71	6862.38	11531.3	8281.85	-	-
pme2960	273.08	153.02	272.068	C15H12O5	[M+H]+	Naringenin chalcone; 2',4,4',6'-Tetrahydroxychalcone	柚皮素查耳酮	Flavonoids	黄酮	Chalcones	查耳酮	73692-50-9	3	8505.22	13440.9	6082.54	20787.4	16850.7	11356.2	11351.2	25976.4	19820.9	13060	20094.8	12727.3	C06561	ko00941,ko01100,ko01110
mws0248	243.06	110.02	244.07	C9H12N2O6	[M-H]-	Uridine	尿嘧啶核苷	Nucleotides and derivatives	核苷酸及其衍生物	Nucleotides and derivatives	核苷酸及其衍生物	58-96-8	2	182133	112864	151690	312699	359075	227147	183278	256574	314830	169823	225232	295566	C00299	ko00240,ko01100,ko01232,ko02010
MWS0994	351.08	164.03	352.087	C10H16N4O10	[M-H]-	N-Carbamoyl-L-aspartate	N-氨基甲酰基-L-天冬氨酸	Amino acids and derivatives	氨基酸及其衍生物	Amino acids and derivatives	氨基酸及其衍生物	13184-27-5	3	12287.9	9547.21	9081.7	13281.3	8757.43	12111.1	14223.8	6382	8078.79	9688.22	12646.7	16797.7	C00438	ko00240,ko00250,ko01100,ko01240
Cmcp007153	317.21	149.1	316.204	C20H28O3	[M+H]+	Lambertianic acid	兰伯松脂酸	Terpenoids	萜类	Ditepenoids	二萜	-	2	9397.41	4216.66	64193.8	52436.1	12939.3	1843.89	994.641	20906.9	46955	39794.6	41685.1	24022	-	-
MWS1962	153.13	83.05	152.12	C10H16O	[M+H]+	cis-Citral	柠檬醛	Organic acids	有机酸	Organic acids	有机酸	5392-40-5	3	36985.5	34973.9	35501.9	27129.6	32253.7	37423	151130	46065.9	40311.6	52704.9	87283.8	59319.5	C09847	ko01110
pmp000413	433.11	283.06	432.106	C21H20O10	[M+H]+	Genistein-8-C-glucoside	染料木素-8-C-葡萄糖苷	Flavonoids	黄酮	Isoflavones	异黄酮	66026-80-0	3	43976.4	122180	51592.9	617401	199127	93229.9	45608.7	70347.4	28582.5	124645	171532	98687.9	C10420	-
Zjgp101331	825.42	469.33	824.419	C42H64O16	[M+H]+	glyyunnansapogenin A-GlcA-Glc	云南甘草皂苷元A-葡萄糖醛酸基-葡萄糖苷	Terpenoids	萜类	Triterpene Saponin	三萜皂苷	-	1	2.05142e+06	2.58298e+06	2.66531e+06	3.74271e+06	1.86686e+06	944748	998948	1.80312e+06	946093	1.38956e+06	2.23065e+06	1.42159e+06	-	-
mws0044	303.05	125.02	304.058	C15H12O7	[M-H]-	Taxifolin(Dihydroquercetin)	花旗松素(二氢槲皮素)	Flavonoids	黄酮	Flavanonols	二氢黄酮醇	480-18-2	2	19472.9	66628	13340.8	132907	77246.6	126108	111521	60288.6	90458.4	22743.7	30742.9	40538.3	C01617	ko00941,ko01100,ko01110
pmb0475	671.18	509	670.174	C29H34O18	[M+H]+	Gallic acid-4-O-(6'''-feruloyl)sophoroside	没食子酸-4-O-(6'''-阿魏酰)槐糖苷	Phenolic acids	酚酸类	Phenolic acids	酚酸类	-	3	4778.65	23601.3	11191	23834	15797.2	24264.5	19387.9	21700.1	20382.1	11050.7	19520.1	18963.6	-	-
Lhdp091311	825.46	423.36	824.419	C42H64O16	[M+H]+	Soyasaponin H glucuronic acid glucoside	大豆皂苷元H葡萄糖醛酸葡萄糖苷	Terpenoids	萜类	Triterpene Saponin	三萜皂苷	-	2	265256	474025	323750	728234	421879	154738	114620	158074	126772	138645	251525	227081	-	-
pme3313	259.02	96.97	260.03	C6H13O9P	[M-H]-	D-Fructose 6-phosphate*	D-果糖-6-磷酸*	Others	其它类	Saccharides	糖类	643-13-0	2	897203	1.671e+06	1.20893e+06	1.72673e+06	2.19471e+06	2.11174e+06	811919	1.24069e+06	880134	692443	816605	1.19708e+06	C00085	ko00052,ko00500,ko00710,ko01100,ko01110,ko01200
MWSmce486	503.16	383.12	504.169	C18H32O16	[M-H]-	Manninotriose	甘露三糖	Others	其它类	Saccharides	糖类	13382-86-0	3	11205.9	11664.7	25243.9	32645.3	21225.1	19198.2	25352	64469.7	22174	24291.2	30869.9	16836	C05404	ko00052,ko01100
pme3705	193.04	72.99	194.043	C6H10O7	[M-H]-	D-Glucoronic acid*	D-葡萄糖醛酸*	Others	其它类	Saccharides	糖类	6556-12-3	3	383462	422129	444287	305838	321940	318160	473889	372335	375552	324233	289189	176718	C00191	ko00040,ko00053,ko00520,ko00562,ko01100,ko01240,ko01250
Lmhp008801	476.28	335.26	475.27	C23H42NO7P	[M+H]+	LysoPE 18:3*	溶血磷脂酰乙醇胺 18:3*	Lipids	脂质	LPE	溶血磷脂酰乙醇胺	-	1	259043	186238	236224	379683	582493	383237	1.11542e+06	591203	958409	924649	1.50107e+06	934957	-	-
MWSslk140	192.07	56.05	191.062	C7H13NO3S	[M+H]+	N-Acetyl-L-Methionine	N-乙酰-L-蛋氨酸	Amino acids and derivatives	氨基酸及其衍生物	Amino acids and derivatives	氨基酸及其衍生物	65-82-7	3	43088.6	32508.9	21978.3	28803.6	37490.9	32657.9	38257	23712.1	13254.6	32078.2	52555.6	32860.2	C02712	-
pmb1207	339.09	177.05	338.079	C19H14O6	[M+H]+	O-Feruloyl 3-hydroxycoumarin	阿魏酰 3-羟基香豆素	Lignans and Coumarins	木脂素和香豆素	Coumarins	香豆素	-	2	1.05885e+06	1.60304e+06	127951	187492	169239	73019.1	82077.2	72363.5	79372.8	946918	1.71687e+06	1.65573e+06	-	-
pmb0751	321.1	147.04	320.09	C16H16O7	[M+H]+	Trans-5-O-(p-Coumaroyl)shikimate	反式-5-O-对香豆酰莽草酸	Phenolic acids	酚酸类	Phenolic acids	酚酸类	-	3	10421.9	28283.2	17042.8	3562.33	19450.3	14918.8	6050.39	17872.5	4421.77	9645.52	18039.9	14846.6	C02947	ko00940,ko00941,ko00945,ko01100,ko01110
pmn001606	309.28	309.28	310.287	C20H38O2	[M-H]-	Eicosenoic acid	二十碳烯酸	Lipids	脂质	Free fatty acids	游离脂肪酸	26764-41-0	3	1.32816e+06	1.08302e+06	1.05505e+06	709181	1.62112e+06	1.25239e+06	1.58638e+06	1.41653e+06	711999	122728	120204	67817.3	C16526	ko01040
mws0636	313.15	166.09	312.147	C18H20N2O3	[M+H]+	L-Phenylalanyl-L-phenylalanine	L-苯丙氨酰-L-苯丙氨酸	Amino acids and derivatives	氨基酸及其衍生物	Amino acids and derivatives	氨基酸及其衍生物	2577-40-4	3	26741.7	14155.2	20555.7	36971.8	16653.5	19248.1	26771.9	24035.8	26630.9	47058.9	86437.1	62989.6	-	-
Zmpn000095	261.04	78.96	262.045	C6H15O9P	[M-H]-	Sorbitol-6-phosphate	山梨糖醇-6-磷酸	Others	其它类	Saccharides	糖类	20479-58-7	3	13586.1	13697.7	6968.57	9	9	9	2831.61	2705.98	3426.58	9446.11	6680.16	5208.8	C01096	ko00051,ko01100
pmf0440	163.08	91.05	162.068	C10H10O2	[M+H]+	4-MethoxycinnaMaldehyde	4-甲氧基肉桂醛	Phenolic acids	酚酸类	Phenolic acids	酚酸类	1963-36-6	3	65479.2	84585.7	65940.1	59380.8	66893.2	54058.5	67920.8	68909.8	65425.8	28768.4	47701.2	54552.1	C10475	-
pmp001106	595.17	577.16	594.159	C27H30O15	[M+H]+	Vitexin-2''-O-glucoside	牡荆素-2''-O-葡萄糖苷	Flavonoids	黄酮	Flavones	黄酮	61360-94-9	2	35998.1	18647	103845	19542.2	22497.5	18051	18399.6	13331.8	20095.2	26976.9	51129	40316.8	C04024	ko00944
MWSmce598	829.28	325.11	828.275	C30H52O26	[M+H]+	Maltopentaose	麦芽五糖	Others	其它类	Saccharides	糖类	34620-76-3	2	668970	1.7764e+06	4.21799e+06	5.26997e+06	4.38851e+06	4.51456e+06	3.88207e+06	5.2427e+06	6.07604e+06	1.18738e+06	2.25574e+06	1.793e+06	-	-
Zmzn000078	168.99	78.96	169.998	C3H7O6P	[M-H]-	Dihydroxyacetone phosphate	磷酸二羟基丙酮	Others	其它类	Saccharides	糖类	57-04-5	3	44574.3	102466	69658.5	39109.4	14837	26912.1	40143.5	8592.06	20409.1	153702	91035.9	95900.8	C00111	ko00010,ko00040,ko00051,ko00052,ko00561,ko00562,ko00564,ko00640,ko00710,ko00760,ko01100,ko01110,ko01200,ko01230
mws1584	515.12	191.03	516.127	C25H24O12	[M-H]-	1,3-O-Dicaffeoylquinic Acid (Cynarin)	1,3-O-双咖啡酰奎宁酸(洋蓟酸)	Phenolic acids	酚酸类	Phenolic acids	酚酸类	30964-13-7	3	198122	75491.2	232513	75123.1	301429	100046	11159.9	28318.3	22461.9	45657	78667.3	50137.1	C10445	-
Zjgp101332	825.42	469.33	824.419	C42H64O16	[M+H]+	24-hydroxyglucoglycyrrhizin	24-hydroxyglucoglycyrrhizin	Terpenoids	萜类	Triterpene Saponin	三萜皂苷	-	3	2.47258e+06	2.96688e+06	1.93023e+06	3.88765e+06	1.97868e+06	885381	1.31031e+06	1.27731e+06	900605	895263	1.61116e+06	1.65811e+06	-	-
pmb1096	118.07	91.05	117.058	C8H7N	[M+H]+	Indole	吲哚	Alkaloids	生物碱	Plumerane	吲哚类生物碱	120-72-9	1	58329.7	15332.3	16701.2	29364.1	99426.2	17300.2	16337.2	12902.3	22271.5	16424.4	21111.6	11118.9	C00463	ko00380,ko00400,ko00402,ko01100,ko01110
pme1119	269.09	137.05	268.081	C10H12N4O5	[M+H]+	Inosine	肌苷	Nucleotides and derivatives	核苷酸及其衍生物	Nucleotides and derivatives	核苷酸及其衍生物	58-63-9	3	217086	69053.3	159865	293493	149539	84449.4	214354	115293	126993	127137	237758	174928	C00294	ko00230,ko01100,ko01232,ko02010
Zmhn001036	433.11	271.06	434.121	C21H22O10	[M-H]-	Choerospondin	南酸枣苷	Flavonoids	黄酮	Flavanones	二氢黄酮	81202-36-0	2	77214.8	116701	62667.5	170719	60629.6	137846	22806.9	84046.6	27987	72039.6	84634	43789.9	-	-
Hmqp005455	297.24	81.07	296.235	C18H32O3	[M+H]+	15(R)-Hydroxylinoleic Acid	15(R)-羟基亚油酸	Lipids	脂质	Free fatty acids	游离脂肪酸	177931-23-6	3	58283.5	40279.3	49538.4	219390	143940	28080.8	37887.1	21866.2	62392.5	109486	59806.6	113551	-	-
Zmhn002508	471.15	309.1	472.158	C21H28O12	[M-H]-	4-p-Cumaroyl-rhamnosyl-(1→6)-D-glucose	4-对香豆酰鼠李糖基-(1→6)-D-葡萄糖	Phenolic acids	酚酸类	Phenolic acids	酚酸类	-	3	114176	46046.9	20178.9	4343.68	26767.8	14005	6510.04	1754.66	7751.67	18922.1	22321.1	34170.3	-	-
pmf0397	311.3	311.3	312.303	C20H40O2	[M-H]-	Arachidic acid	花生酸(C20:0)	Lipids	脂质	Free fatty acids	游离脂肪酸	506-30-9	3	471628	590042	574934	561447	580593	582973	487773	538143	600582	465005	783674	461273	C06425	ko01040
pma6455	229.01	96.97	230.019	C5H11O8P	[M-H]-	Ribulose-5-phosphate	核酮糖-5-磷酸	Others	其它类	Saccharides	糖类	4300-28-1	3	56566.3	100386	111850	108575	97393	93584	70293.9	88550.7	74678.7	56732.2	49728.9	89859.1	C00117	ko00030,ko00230,ko00440,ko00710,ko00750,ko01100,ko01110,ko01200,ko01230,ko01240
Xmsn002700	465.13	303.05	466.111	C21H22O12	[M-H]-	Taxifolin-3'-O-glucoside	花旗松素-3'-O-葡萄糖苷	Flavonoids	黄酮	Flavanonols	二氢黄酮醇	31106-05-5	2	34373.1	21668.2	6671.91	29604.1	42376.5	45734.8	8426.77	15162	9032.2	9511.17	16796.2	18996.5	-	-
Lmhp009384	679.39	263.24	678.383	C33H58O14	[M+H]+	1-Linoleoylglycerol-2,3-di-O-glucoside*	1-亚油酰甘油酯-2,3-二-O-葡萄糖苷*	Lipids	脂质	Glycerol ester	甘油酯	-	1	154602	141501	57702.5	194813	99252	113777	140825	114940	296913	102532	198103	138595	-	-
Hmln007765	807.46	747.44	808.461	C43H68O14	[M-H]-	silphioside A	罗盘草苷 A	Terpenoids	萜类	Triterpene Saponin	三萜皂苷	58546-61-5	2	42481.1	40137.7	52523.2	7728.96	44158.3	27529.8	8116.61	7334.66	17627.9	10383.5	19534.8	12954.9	-	-
pmb2657	289.12	131.08	290.123	C10H18N4O6	[M-H]-	Argininosuccinic acid	精氨基琥珀酸	Organic acids	有机酸	Organic acids	有机酸	2387-71-5	3	4570.6	6495.81	29713.3	21268.8	33065.6	27091.7	37355.1	18213	26711.4	6857.05	13824.9	10754.9	C03406	ko00220,ko00250,ko01100,ko01110,ko01230
pmb0628	613.18	451.1	612.169	C27H32O16	[M+H]+	Eriodictyol-8-C-glucoside-4'-O-glucoside	圣草酚-8-C-葡萄糖苷-4'-O-葡萄糖苷	Flavonoids	黄酮	Flavanones	二氢黄酮	-	3	128994	24570.7	140972	53743.4	58346.1	38679.8	50821.2	44276.2	31044.6	66629.8	43599.6	35350.1	-	-
Hmjp003123	479.08	303.06	478.075	C21H18O13	[M+H]+	Quercetin-5-O-glucuronide	槲皮素-5-O-葡萄糖醛酸苷	Flavonoids	黄酮	Flavonols	黄酮醇	-	3	13055.1	31440.4	12517.8	16134.8	23481.7	22785.2	6508.77	18675.4	7757.59	35380.3	23442.8	18169.7	-	-
pme1216	122.02	78.03	123.032	C6H5NO2	[M-H]-	2-Picolinic acid	2-吡啶甲酸	Organic acids	有机酸	Organic acids	有机酸	98-98-6	3	69002.5	57487.2	49312.3	59781.8	44724.6	24158.2	9910.41	21598.4	7575.86	12547.4	21700.9	26137.9	C10164	ko00380,ko01100
pmn001525	477.14	169	478.147	C23H26O11	[M-H]-	3,5-Digalloylshikimic acid	3,5-二没食子酰莽草酸	Phenolic acids	酚酸类	Phenolic acids	酚酸类	95753-52-9	3	17082.1	11633.5	9594.14	8972.61	17055.3	8783.19	5139.33	6868.54	11820	19348.9	12960.3	9826.82	-	-
Lasp013837	335.26	81.07	334.25	C21H34O3	[M+H]+	Ent-16beta-Methoxy-19-Kauranoic Acid(iso-03)	对映-16-甲氧基-19-贝壳杉酸(iso-03)	Terpenoids	萜类	Ditepenoids	二萜	-	2	197716	165067	208470	73449	99312.4	67914.5	229280	61076.2	88942.3	114493	170201	86023.3	-	-
mws0057	451.12	289.07	450.116	C21H22O11	[M+H]+	Eriodictyol-7-O-glucoside	圣草酚-7-O-葡萄糖苷	Flavonoids	黄酮	Flavanones	二氢黄酮	38965-51-4	2	149817	114572	140456	23999	63705	24897.4	10030.3	2598.72	12852.8	54175.4	61998.6	29656.5	-	-
Xmyp005654	449.11	287.06	448.101	C21H20O11	[M+H]+	Kaempferol-4'-O-glucoside*	山柰酚-4'-O-葡萄糖苷*	Flavonoids	黄酮	Flavonols	黄酮醇	-	3	144796	243630	90954.1	322927	335474	301570	106154	129137	94406.8	54613.4	56052.5	27610.1	-	-
mws1358	109.03	81.03	110.037	C6H6O2	[M-H]-	Pyrocatechol	邻苯二酚;儿茶酚	Phenolic acids	酚酸类	Phenolic acids	酚酸类	120-80-9	3	19129.8	11455.2	8312.19	11694.3	15505.8	6512.26	3465.39	1062.62	3280.55	6586.27	13610.2	10040.4	C00090	ko01100
Lasp006280	957.5	469.33	956.498	C48H76O19	[M+H]+	3-O-Glucosyl(1→4)rhamnosyl quinovic acid-28-O-glucosyl ester	3-O-葡萄糖基(1→4)鼠李糖基奎诺酸-28-O-葡萄糖基酯	Terpenoids	萜类	Triterpene Saponin	三萜皂苷	-	2	426323	260520	325761	255895	323314	302277	352451	280063	392650	138258	263978	287075	-	-
Lmhp009773	515.32	261.22	514.314	C27H46O9	[M+H]+	1-α-Linolenoyl-glycerol-3-O-glucoside*	1-α-亚麻酸甘油酯-3-O-葡萄糖苷*	Lipids	脂质	Glycerol ester	甘油酯	-	2	7817.2	13965.7	12292.4	5172.14	3662.38	1664.81	9	9	9	8109.22	17340.4	13011.1	-	-
Lmbn001181	531.14	531.13	532.143	C22H28O15	[M-H]-	Fraxetin-7,8-di-O-glucoside	秦皮素-7,8-二-O-葡萄糖苷	Lignans and Coumarins	木脂素和香豆素	Coumarins	香豆素	-	2	746132	1.02003e+06	667325	730978	1.12264e+06	1.02292e+06	480000	1.01161e+06	914025	1.73289e+06	861400	1.11942e+06	-	-
Lsjp211254	423.36	203.18	422.355	C30H46O	[M+H]+	Lupa-1,20(29)-dien-3-one (Glochidone)	羽扇豆烷-1,20(29)-二烯-3-酮 (算盘子酮)	Terpenoids	萜类	Triterpene	三萜	-	2	143474	408883	123533	118243	73509.5	131121	83780.8	103383	105077	120329	72770.5	62460.8	-	-
MWSmce203	341.12	73.03	342.116	C12H22O11	[M-H]-	D-Cellobiose	D-纤维二糖	Others	其它类	Saccharides	糖类	528-50-7	3	17760.6	35330.6	34289.9	41558.5	37456.3	45603.7	42514.3	31049.7	38352.5	38570.2	52353.2	24414	-	-
mws1589	503.16	179.06	504.169	C18H32O16	[M-H]-	D-Panose	D-潘糖	Others	其它类	Saccharides	糖类	33401-87-5	1	2.01837e+06	1.28834e+06	1.08656e+06	1.07122e+06	1.24904e+06	867402	2.1089e+06	2.84835e+06	1.34402e+06	848879	386975	769741	C00713	-
pme3443	207.07	192.04	208.074	C11H12O4	[M-H]-	Sinapinaldehyde	芥子醛	Phenolic acids	酚酸类	Phenolic acids	酚酸类	4206-58-0	3	15920.2	6677.91	9260.33	6745.49	20635.1	2037.18	3581.53	6013.26	3885.88	10209.5	13181	5979.03	C05610	ko00940,ko01100,ko01110
Lmhp009526	515.32	261.22	514.314	C27H46O9	[M+H]+	2-α-Linolenoyl-glycerol-1-O-glucoside*	2-α-亚麻酸甘油酯-1-O-葡萄糖苷*	Lipids	脂质	Glycerol ester	甘油酯	-	2	6780.04	5921.21	9309.41	3427.88	1554.69	4530.58	1871.12	1120.46	2320.3	13653.8	20042.6	9431.54	-	-
pmn001687	295.05	163.04	296.053	C13H12O8	[M-H]-	Cis-Coutaric acid	顺式-对香豆酰酒石酸	Phenolic acids	酚酸类	Phenolic acids	酚酸类	67920-37-0	3	20448.1	19402.6	17482.2	25424	32852.8	17034.4	11543.1	16235.9	26361.6	18464.8	26217.2	39294.3	-	-
pme3096	118.01	74.02	119.022	C3H5NO4	[M-H]-	Aminomalonic acid	氨基丙二酸	Organic acids	有机酸	Organic acids	有机酸	1068-84-4	3	133759	143280	832075	648085	759424	409627	1.08337e+06	412713	403792	366440	224633	500905	C00872	-
mws4175	175.02	85.03	176.032	C6H8O6	[M-H]-	D-Glucurono-6,3-lactone	D-葡萄糖醛酸-6,3-内酯	Others	其它类	Saccharides	糖类	32449-92-6	3	35714.9	85596	70273	114144	124015	43734	54476.5	41769.3	32987.2	38370.9	17028.3	35036.1	C02670	ko00053,ko01100
Zmrp110404	457.37	439.36	456.36	C30H48O3	[M+H]+	3-Hydroxyurs-12-en-24-oic acid (β-Boswellic acid)	3-羟基熊果-12-烯-24-酸 (β-乳香酸)	Terpenoids	萜类	Triterpene	三萜	631-69-6	2	283042	38610.3	126480	289287	303218	50713.2	36733.2	35115.2	32384.3	118522	80599.5	54059.9	-	-
mws0289	480.31	339.29	479.301	C23H46NO7P	[M+H]+	LysoPE 18:1*	溶血磷脂酰乙醇胺 18:1*	Lipids	脂质	LPE	溶血磷脂酰乙醇胺	89576-29-4	3	4.58707e+06	1.75657e+06	1.37522e+06	2.91587e+06	4.66109e+06	4.07598e+06	3.81717e+06	2.21501e+06	2.19511e+06	6.54945e+06	2.84695e+06	5.09648e+06	-	-
mws0032	319.04	153.02	318.038	C15H10O8	[M+H]+	Myricetin	杨梅素	Flavonoids	黄酮	Flavonols	黄酮醇	529-44-2	3	29069.2	92603.7	6379.61	80047.2	33408.4	50263.4	15680.6	45663.5	54930.4	20333.9	46256.1	32844.6	C10107	ko00941,ko00944,ko01110
Lmhp008513	677.37	261.22	676.367	C33H56O14	[M+H]+	2-α-Linolenoyl-glycerol-1,3-di-O-glucoside	2-α-亚麻酸甘油酯-1,3-二-O-葡萄糖苷	Lipids	脂质	Glycerol ester	甘油酯	-	1	39262	14585.5	16392.9	16256.3	11140.8	11310	24617.7	14777.1	18457	21755.5	48356.1	32459.5	-	-
mws0264	341.11	119.03	342.116	C12H22O11	[M-H]-	D-Trehalose	D-海藻糖	Others	其它类	Saccharides	糖类	99-20-7	3	1.53211e+06	2.37184e+06	465456	205083	483343	431196	883283	488174	594539	1.38255e+06	1.01323e+06	584442	C01083	ko00500,ko01100,ko01110,ko02010
Lskp211487	487.34	405.31	486.334	C30H46O5	[M+H]+	2,19-Dihydroxy-3-oxo-24-norolean-12-en-28-oic acid	2,19-二羟基-3-氧代-24-去甲基齐墩果-12-烯-28-酸	Terpenoids	萜类	Triterpene	三萜	-	2	166183	233923	134568	389810	252069	181234	99979.9	94333.5	60059.9	280324	115332	256527	-	-
Hmyn005972	589.52	283.26	590.527	C38H70O4	[M-H]-	Coixenolide	薏苡仁酯	Lipids	脂质	Free fatty acids	游离脂肪酸	-	3	9900.8	4162.21	2142.65	2809.45	9696.63	7244.63	7800.7	5708.06	1840.92	2358.13	2578.12	1056.48	C17566	-
mws4163	665.21	485.15	666.222	C24H42O21	[M-H]-	Nystose	蔗果四糖	Others	其它类	Saccharides	糖类	13133-07-8	1	1.19932e+06	1.50677e+06	2.26451e+06	2.20096e+06	2.11317e+06	2.0065e+06	2.29123e+06	2.25194e+06	2.24447e+06	921509	1.3995e+06	582071	-	-
Lssp210280	423.09	261.04	422.085	C19H18O11	[M+H]+	1,5-dihydroxy ketone-6 murine O-β-D-glucoside	1,5-二羟基 酮-6-O-β-D-葡萄糖苷	Others	其它类	Others	其它	-	2	9356.35	14916.5	40641.1	36529.8	19842.3	35028.8	19124.1	56609.4	39853.5	26943.7	39018.6	62766.5	-	-
Zmzn000079	199	78.96	200.009	C4H9O7P	[M-H]-	D-Erythrose-4-phosphate	D-赤藓糖-4-磷酸	Others	其它类	Saccharides	糖类	585-18-2	3	9437.87	57874.4	27138.3	48375	36416	39237.7	6758.68	23817.4	42601.7	45539.9	22538.6	23030.2	C00279	ko00030,ko00400,ko00710,ko00750,ko01100,ko01110,ko01200,ko01230,ko01240
pmb2787	293.21	275.2	294.219	C18H30O3	[M-H]-	9-Oxo-10E,12Z-octadecadienoic acid	9-过氧-10E,12Z-十八碳二烯酸	Lipids	脂质	Free fatty acids	游离脂肪酸	54232-59-6	3	6489.33	4734.01	3925.8	11306.4	4510.83	5830.92	4906.41	3418.1	2645.42	5292.74	4365.6	9724.59	C14766	ko00591
pme0241	123.04	79.05	122.037	C7H6O2	[M+H]+	Benzoic acid	苯甲酸	Phenolic acids	酚酸类	Phenolic acids	酚酸类	65-85-0	3	98538.2	64918.2	88411	84234.8	92430.4	68540.8	71628.6	82805.2	22785.7	66245.9	54916.9	24514.7	C00180	ko00996,ko01100,ko01110
pmb2857	308.1	146.05	309.106	C11H19NO9	[M-H]-	L-Glutamic acid-O-glycoside	L-谷氨酸-O-葡萄糖苷	Amino acids and derivatives	氨基酸及其衍生物	Amino acids and derivatives	氨基酸及其衍生物	-	3	22736	24406	6498.37	58795.8	56251.3	49789.3	1281.96	23277.6	26245	22645.7	12033.9	31905.4	-	-
mws0582	322.11	130.05	321.099	C11H19N3O6S	[M+H]+	S-(Methyl)glutathione	S-甲基谷胱甘肽	Amino acids and derivatives	氨基酸及其衍生物	Amino acids and derivatives	氨基酸及其衍生物	2922-56-7	3	33823	39662.7	136644	40857.5	113823	114797	2.35546e+06	166905	128329	194415	187359	391183	C11347	-
pmp001161	389.12	328.1	388.116	C20H20O8	[M+H]+	5-Hydroxyauranetin	5-羟基酸橙黄酮	Flavonoids	黄酮	Flavonols	黄酮醇	50439-46-8	1	4195	9199.26	975.619	11818.7	1032.13	6720.74	9	20425.1	2853.47	3139.51	8271.33	5445.75	-	-
MA10039641	341.11	89.02	342.116	C12H22O11	[M-H]-	Lactobiose	乳二糖	Others	其它类	Saccharides	糖类	63-42-3	1	6.28465e+06	3.27266e+06	1.5476e+06	2.15645e+06	1.566e+06	1.38408e+06	1.94702e+06	1.70683e+06	2.03774e+06	2.24237e+06	2.44227e+06	4.87708e+06	C00243	ko00052,ko01100,ko02010
Lhwp110121	489.36	425.34	488.35	C30H48O5	[M+H]+	2,3,19-trihydroxyurs-12-en-28-oic acid (Euscaphic acid)	2,3,19-三羟基熊果-12-烯-28-酸 (蔷薇酸)	Terpenoids	萜类	Triterpene	三萜	53155-25-2	2	259521	24922.7	201507	235399	23759.7	9518.99	11834.2	10590.5	4990.93	83712.4	91479.4	32560.2	C17890	-
pme1841	103.12	86.1	102.116	C5H14N2	[M+H]+	Cadaverine	尸胺	Alkaloids	生物碱	Alkaloids	生物碱	462-94-2	3	45913.7	56086.5	25494.9	48871.8	83184.3	14203.6	130906	45200.1	52127.5	20508	49866.6	27319.7	C01672	ko00310,ko00470,ko00480,ko00960,ko01100,ko01110
Wmnp000001	473.36	455.35	472.355	C30H48O4	[M+H]+	3,12-Dihydroxyoleanan-28,13-olide (Oleanderolide)	3,12-二羟基齐墩果烷-28,13-交酯 (Oleanderolide)	Terpenoids	萜类	Triterpene	三萜	-	3	73273.9	43858.6	35918.3	380870	99385.4	18402.2	13406.5	6807.21	9993.93	86022.4	154350	61233	-	-
pme2134	121.05	59.01	122.058	C4H10O4	[M-H]-	D-Threitol	D-苏糖醇	Others	其它类	Saccharides	糖类	2418-52-2	3	351463	673795	685111	724629	733675	574613	294022	421407	670056	321791	945532	640507	C16884	-
Lmyp003139	617.11	153.02	616.106	C28H24O16	[M+H]+	Quercetin-3-O-(6''-O-galloyl)galactoside	槲皮素-3-O-(6''-O-没食子酰)半乳糖苷	Flavonoids	黄酮	Flavonols	黄酮醇	53171-28-1	3	13699.1	22088.2	13092.7	14850	4464.21	12489.5	5021.5	15964.9	17661	30358.8	13631.3	13914.6	-	-
