# Supplementary material for: Integrated analysis of transcriptomics and metabolomics and high-throughput amplicon sequencing reveals the synergistic effects of secondary metabolites and rhizosphere microbiota on root rot resistance in Psammosilene tunicoides
Source: Front Microbiol. 2025 Apr 14;16:1554406. doi: 10.3389/fmicb.2025.1554406 (PMC12034638; doi:10.3389/fmicb.2025.1554406)
Supplement: Supplementary file 12 [file Table_12.xlsx]

## Sheet: flavone-metabolize
Index	CD1	CD2	CD3	CH1	CH2	CH3
Apigenin-6-C-glucoside (Isovitexin)*	784000	346000	114000	42200	67500	38600
Vitexin-2''-O-rhamnoside	1310000	2600000	345000	118000	170000	63800
Kaempferol-3-O-glucoside (Astragalin)*	512000	614000	262000	49000	104000	48500
Apigenin-8-C-Glucoside (Vitexin)*	433000	159000	59600	18400	26000	13700
Quercetin-3-O-glucoside (Isoquercitrin)*	6040000	6800000	6270000	932000	1640000	1170000
Luteolin-7-O-glucuronide	182000	141000	59000	43000	56400	84100
Isovitexin-8-O-xyloside	105000	95800	15500	1990	5400	14500
Vitexin-7-O-(6''-p-coumaroyl)glucoside	29400	90700	34200	16900	902	6930
Isovitexin-7-O-glucoside(Saponarin)	584000	745000	70100	27400	46100	7560
Rhamnetin; 3,5,3',4'-Tetrahydroxy-7-Methoxyflavone	6660	3660	2480	9	9	9
Genistein-8-C-apiosyl(1→6)glucoside	467000	1350000	205000	11300	32800	37300
Epicatechin-4'-O-β-D-glucopyranoside	208000	1030000	172000	30100	22100	3370
Vaccarin	1170000	3620000	306000	30000	151000	12100
Orientin-2''-O-xyloside	548000	121000	13600	6030	9470	6990

## Sheet: flavone-gene
Index	Group	CD1	CD2	CD3	CH1	CH2	CH3
1	PAL	7.83	2.83	6.09	6.02	5.5	1.11
2	PAL	32.2	5.02	7.9	10.47	28.31	6.1
3	4CL	13.4	10.68	76.15	12.25	22.65	13.33
4	4CL	0.9	0.39	4.46	2.05	4.05	1.11
5	4CL	1.36	0.8	4.67	1	1.67	1.23
6	4CL	10.6	9.55	58.95	26.19	43.7	21.59
7	4CL	14.39	0	0.66	0	0	0
8	4CL	11.42	0	0	0	0	0
9	4CL	45.23	17.17	27.21	13.49	20.1	17.11
10	CHS	5.59	1.5	12.47	0.11	0	0.05
11	CHS	4.36	1.58	4.01	1.73	1.77	0.77
12	CHS	7.94	3.9	8.76	0.48	0	0
13	CHS	3.58	51.25	0.03	3.27	1.84	7.59
14	CHS	2.15	49.77	0.06	3.39	1.34	7.22
15	CHI	5.22	16.13	0.06	2.81	2.12	2.2
16	CHI	8.19	8.56	6.15	8.38	7.12	11.96
17	F3H	5.92	65.9	0.06	7.37	3.97	11.92
18	F3H	4.59	62.14	0.38	8.1	2.86	14.77
19	FLS	4.42	5.88	27.19	12.75	7.82	6.33
20	FLS	1.06	0	0.13	0.54	0	0
21	HIDM	26.85	22.85	2.94	1.87	2.89	0.61
22	HIDM	11.28	16.96	1.74	6.02	18.92	10.72
23	HIDM	5.26	0.23	0	0	1.01	0.79

## Sheet: microorganism
Index	CD1	CD2	CD3	CH1	CH2	CH3
g__Oryzihumus	0.11	0.17	0.09	0.07	0.02	0.05
g__Actinobacteria_unclassified	1.52	1.32	1.42	1.29	0.89	1.14
g__Frankiales_unclassified	0.55	0.47	0.41	0.38	0.08	0.25
g__Saccharopolyspora	0.01	0.04	0.03	0.01	0	0
g__Iamia	0.18	0.18	0.24	0.14	0.12	0.13
g__Geodermatophilus	0.15	0.14	0.15	0.12	0.08	0.12
g__Jatrophihabitans	0.19	0.17	0.21	0.16	0.17	0.16
g__Kibdelosporangium	0.04	0.1	0.07	0.05	0.02	0.03

## Sheet: triterpene-metabolize
Index	CD1	CD2	CD3	CH1	CH2	CH3
3,16-Dihydroxy-23-oxoolean-12-en-28-oic acid (Quillaic acid)	8.70354e+06	3.03342e+06	1.57257e+06	1.22544e+06	915328	746706
Norarjunolic acid	6.53283e+06	217879	191736	25272.8	38032.6	23768
3,24-Dihydroxy-17,21-semiacetal-12(13)oleanolic fruit	1.64766e+07	3.6269e+06	1.29567e+06	727893	629367	925392
2,3-Dihydroxyolean-12-en-28-oic acid (2-Hydroxyoleanolic acid)*	1.66452e+07	3.44802e+06	1.25102e+06	759295	688046	828981
23-Hydroxy-3-oxoolean-12-en-28-oic acid (Hederagonic acid)	369377	174566	66675.6	51699.9	8966.44	7093.9
3,23-Dihydroxy-30-noroleana-12,20(29)-dien-28-oic acid (30-Norhederagenin)	204532	134814	41435.8	37947.3	24911.1	39287.6
3-Oxoolean-12-en-28-oic Acid (Oleanonic acid)	393457	422726	103822	80026	39260.9	43898.6
2,3-Diacetoxy-18-hydroxyoleana-5,12-dien-28-oic acid(ISO-2)	920919	58676.7	27922.8	13810.4	4543.58	8788.71
2,3,23-Trihydroxyolean-12-en-28-oic acid (Arjunolic acid)	26430.9	25790.1	4654.48	3461.37	8387.4	4879.67
2,19-Dihydroxy-3-oxo-24-norolean-12-en-28-oic acid	389810	252069	181234	99979.9	94333.4	60059.9

## Sheet: triterpene-microorganism
Index	Group		CD1	CD2	CD3	CH1	CH2	CH3
1	HMG		0	10.05	0.54	0	0	0
2	HMG		58.3	50.05	53.44	36.73	62.35	68.4
3	HMG		0	9.72	2.21	0	0	0
4	HMG		59.51	26.76	70.1	38.79	47.42	66.96
5	HMG		5.13	1.65	0	0.66	2.55	0.67
6	HMG		51.39	218.72	4.71	40.7	35.7	34.64
7	MK		2.8	5.95	1.39	0.16	1.04	0
8	MK		3.41	13.74	1.63	1.79	1.09	0
9	PPS		1.44	11.38	0.39	0	0.52	0
10	PPS		0.4	6.85	0.29	0	0.08	0
11	PPS		4.68	3.21	19.85	5.49	16.76	11.99
12	SE		0.73	8.31	0.22	0	0.17	0
13	SE		5.8	2.15	4.61	1.43	3.2	0.15
14	SE		2.3	7.79	1.48	2.26	2.53	5.61
15	SE		0.86	0.1	3.77	0.77	4.18	0.39
16	SE		7.11	6.66	0.09	35.75	146.85	66.64
17	CYP72		2.9	1.74	3.13	0.62	2.55	2.79
18	CYP72		55.49	182.82	0.47	60.05	250.15	142.13
19	CYP72		138.35	11.56	628.3	8.73	2.33	78.73
20	CYP72		1.84	2.18	0.69	0.84	0.68	2.76
21	CYP72		22.11	11.05	383.94	26.49	10.7	3.68
22	UGT74		2.48	0.2	107.15	2.92	3.25	1.24
23	UGT74		10.93	22.35	46.73	4.4	34.81	62.35
24	DXS		6.66	16.07	1.19	1.13	0.67	1.83
25	DXS		3.62	1.62	18.4	2.8	3.52	6.88
26	DXS		2.15	2.58	8.98	3	3.94	4.88
